# Supplementary material for: Planar seismic source characterization models developed for probabilistic seismic hazard assessment of Istanbul
Source: Copernicus journal article supplement (doi:10.5194/nhess-17-2365-2017), 2017-12-22
Supplement: Supplementary file 1 [file nhess-17-2365-2017-supplement.zip]

Archive with 5 entries (5 files):
- nhess-17-2365-2017-supplement-title-page.pdf
- Draft_Istanbul_final_clean.docx
- Supplement 2.xlsx
- Supplement 1.docx
- Supplement 3.xlsx
