# Supplementary material for: Planar seismic source characterization models developed for probabilistic seismic hazard assessment of Istanbul
Source: Copernicus journal article supplement (doi:10.5194/nhess-17-2365-2017), 2017-12-22
Supplement: Supplementary file 1 [file nhess-17-2365-2017-supplement.zip › nhess-17-2365-2017-supplement-title-page.pdf]

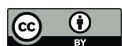

## *Supplement of*

# **Planar seismic source characterization models developed for probabilistic seismic hazard assessment of Istanbul**

**Zeynep Gülerce et al.**

*Correspondence to:* Zeynep Gülerce (zyilmaz@metu.edu.tr)

- nhess-17-2365-2017-supplement-title-page.pdf
- Draft\_Istanbul\_final\_clean.docx
- Supplement 1.docx
- Supplement 2.xlsx
- Supplement 3.xlsx

The copyright of individual parts of the supplement might differ from the CC BY 3.0 License.
