# Supplementary material for: Planar seismic source characterization models developed for probabilistic seismic hazard assessment of Istanbul
Source: Copernicus journal article supplement (doi:10.5194/nhess-17-2365-2017), 2017-12-22
Supplement: Supplementary file 1 [file nhess-17-2365-2017-supplement.zip › Supplement 2.xlsx]

## Sheet: Sheet1
Longitude	Latitude	Activity rate
27.1	39.7	3.58227e-10
27.1	39.75	3.13773e-09
27.1	39.8	2.04454e-08
27.1	39.85	1.00688e-07
27.1	39.9	3.90573e-07
27.1	39.95	1.29851e-06
27.1	40	4.08909e-06
27.1	40.05	1.23745e-05
27.1	40.1	3.2986e-05
27.1	40.15	7.10747e-05
27.1	40.2	0.000118919
27.1	40.25	0.000154327
27.1	40.3	0.000162387
27.1	40.35	0.000167559
27.1	40.4	0.000248562
27.1	40.45	0.000506811
27.1	40.5	0.000953428
27.1	40.55	0.00139226
27.1	40.6	0.00151801
27.1	40.65	0.00122724
27.1	40.7	0.000735136
27.1	40.75	0.000326573
27.1	40.8	0.000107918
27.1	40.85	2.70184e-05
27.1	40.9	5.97103e-06
27.1	40.95	2.73298e-06
27.1	41	3.80541e-06
27.1	41.05	5.83265e-06
27.1	41.1	7.08844e-06
27.1	41.15	6.45363e-06
27.1	41.2	4.3399e-06
27.1	41.25	2.1466e-06
27.1	41.3	7.80628e-07
27.1	41.35	2.08433e-07
27.1	41.4	4.08736e-08
27.1	41.45	5.88455e-09
27.1	41.5	6.2253e-10
27.1	41.55	4.83633e-11
27.1	41.6	2.75892e-12
27.1	41.65	1.15667e-13
27.1	41.7	3.59784e-15
27.1	41.75	9.1572e-17
27.1	41.8	3.48195e-18
27.1	41.85	3.17925e-19
27.1	41.9	3.12562e-20
27.1	41.95	2.35762e-21
27.1	42	1.31044e-22
27.1	42.05	5.35352e-24
27.1	42.1	1.60571e-25
27.1	42.15	3.5373e-27
27.1	42.2	5.72541e-29
27.1	42.25	6.80303e-31
27.15	39.7	1.51801e-09
27.15	39.75	1.31235e-08
27.15	39.8	8.41341e-08
27.15	39.85	4.032e-07
27.15	39.9	1.4765e-06
27.15	39.95	4.37103e-06
27.15	40	1.15684e-05
27.15	40.05	2.98033e-05
27.15	40.1	7.2666e-05
27.15	40.15	0.00015213
27.15	40.2	0.000255654
27.15	40.25	0.000338508
27.15	40.3	0.000360649
27.15	40.35	0.000343525
27.15	40.4	0.000391611
27.15	40.45	0.000640001
27.15	40.5	0.00111135
27.15	40.55	0.00158392
27.15	40.6	0.00171416
27.15	40.65	0.00138569
27.15	40.7	0.000834941
27.15	40.75	0.000375871
27.15	40.8	0.000127602
27.15	40.85	3.45773e-05
27.15	40.9	1.05669e-05
27.15	40.95	8.32001e-06
27.15	41	1.27135e-05
27.15	41.05	1.91481e-05
27.15	41.1	2.304e-05
27.15	41.15	2.08952e-05
27.15	41.2	1.40108e-05
27.15	41.25	6.9172e-06
27.15	41.3	2.50984e-06
27.15	41.35	6.68887e-07
27.15	41.4	1.30941e-07
27.15	41.45	1.88195e-08
27.15	41.5	1.98746e-09
27.15	41.55	1.54119e-10
27.15	41.6	8.77839e-12
27.15	41.65	3.69471e-13
27.15	41.7	1.21496e-14
27.15	41.75	4.81903e-16
27.15	41.8	4.7533e-17
27.15	41.85	6.10595e-18
27.15	41.9	6.22011e-19
27.15	41.95	4.68584e-20
27.15	42	2.5946e-21
27.15	42.05	1.05462e-22
27.15	42.1	3.14811e-24
27.15	42.15	6.90509e-26
27.15	42.2	1.11204e-27
27.15	42.25	1.31546e-29
27.2	39.7	5.46595e-09
27.2	39.75	4.65471e-08
27.2	39.8	2.94054e-07
27.2	39.85	1.38119e-06
27.2	39.9	4.87957e-06
27.2	39.95	1.33881e-05
27.2	40	3.07546e-05
27.2	40.05	6.61795e-05
27.2	40.1	0.00014125
27.2	40.15	0.000279871
27.2	40.2	0.000469449
27.2	40.25	0.000636541
27.2	40.3	0.000699157
27.2	40.35	0.000658682
27.2	40.4	0.000643979
27.2	40.45	0.000838401
27.2	40.5	0.00129073
27.2	40.55	0.00176433
27.2	40.6	0.00188887
27.2	40.65	0.00153012
27.2	40.7	0.000933882
27.2	40.75	0.000431222
27.2	40.8	0.000154396
27.2	40.85	4.90725e-05
27.2	40.9	2.30227e-05
27.2	40.95	2.40779e-05
27.2	41	3.62379e-05
27.2	41.05	5.29471e-05
27.2	41.1	6.29276e-05
27.2	41.15	5.67698e-05
27.2	41.2	3.79849e-05
27.2	41.25	1.87157e-05
27.2	41.3	6.78055e-06
27.2	41.35	1.80411e-06
27.2	41.4	3.52692e-07
27.2	41.45	5.06119e-08
27.2	41.5	5.33622e-09
27.2	41.55	4.13233e-10
27.2	41.6	2.35762e-11
27.2	41.65	1.02366e-12
27.2	41.7	4.51287e-14
27.2	41.75	4.56303e-15
27.2	41.8	7.47244e-16
27.2	41.85	1.02538e-16
27.2	41.9	1.04666e-17
27.2	41.95	7.85471e-19
27.2	42	4.32952e-20
27.2	42.05	1.75222e-21
27.2	42.1	5.20822e-23
27.2	42.15	1.1373e-24
27.2	42.2	1.82314e-26
27.2	42.25	2.14833e-28
27.25	39.7	1.68459e-08
27.25	39.75	1.40662e-07
27.25	39.8	8.73514e-07
27.25	39.85	4.032e-06
27.25	39.9	1.38967e-05
27.25	39.95	3.6359e-05
27.25	40	7.56239e-05
27.25	40.05	0.00013805
27.25	40.1	0.000248908
27.25	40.15	0.000449557
27.25	40.2	0.000741363
27.25	40.25	0.00102988
27.25	40.3	0.00117587
27.25	40.35	0.00113418
27.25	40.4	0.00104649
27.25	40.45	0.00115806
27.25	40.5	0.0015635
27.25	40.55	0.00202206
27.25	40.6	0.00212757
27.25	40.65	0.00172973
27.25	40.7	0.00107555
27.25	40.75	0.000515114
27.25	40.8	0.00020013
27.25	40.85	8.01903e-05
27.25	40.9	5.3933e-05
27.25	40.95	6.17687e-05
27.25	41	8.78704e-05
27.25	41.05	0.000123416
27.25	41.1	0.000144415
27.25	41.15	0.00012954
27.25	41.2	8.6452e-05
27.25	41.25	4.25341e-05
27.25	41.3	1.5386e-05
27.25	41.35	4.08909e-06
27.25	41.4	7.98098e-07
27.25	41.45	1.14422e-07
27.25	41.5	1.20493e-08
27.25	41.55	9.33536e-10
27.25	41.6	5.41925e-11
27.25	41.65	2.82638e-12
27.25	41.7	2.84887e-13
27.25	41.75	5.73406e-14
27.25	41.8	1.05566e-14
27.25	41.85	1.45937e-15
27.25	41.9	1.48497e-16
27.25	41.95	1.1098e-17
27.25	42	6.09211e-19
27.25	42.05	2.45622e-20
27.25	42.1	7.26833e-22
27.25	42.15	1.58046e-23
27.25	42.2	2.52368e-25
27.25	42.25	2.95957e-27
27.3	39.7	4.50076e-08
27.3	39.75	3.65492e-07
27.3	39.8	2.21925e-06
27.3	39.85	1.00497e-05
27.3	39.9	3.392e-05
27.3	39.95	8.59331e-05
27.3	40	0.00016768
27.3	40.05	0.000269838
27.3	40.1	0.000407525
27.3	40.15	0.000643114
27.3	40.2	0.00101639
27.3	40.25	0.0014381
27.3	40.3	0.00171105
27.3	40.35	0.00171572
27.3	40.4	0.00158115
27.3	40.45	0.00161038
27.3	40.5	0.0019546
27.3	40.55	0.00238011
27.3	40.6	0.00245276
27.3	40.65	0.00199957
27.3	40.7	0.00126807
27.3	40.75	0.00063412
27.3	40.8	0.000273989
27.3	40.85	0.000141181
27.3	40.9	0.000119386
27.3	40.95	0.000137306
27.3	41	0.000181449
27.3	41.05	0.000242854
27.3	41.1	0.00027866
27.3	41.15	0.000248216
27.3	41.2	0.000165224
27.3	41.25	8.11763e-05
27.3	41.3	2.93362e-05
27.3	41.35	7.78552e-06
27.3	41.4	1.51836e-06
27.3	41.45	2.17427e-07
27.3	41.5	2.29016e-08
27.3	41.55	1.792e-09
27.3	41.6	1.16169e-10
27.3	41.65	1.17466e-11
27.3	41.7	2.76584e-12
27.3	41.75	6.78055e-13
27.3	41.8	1.26962e-13
27.3	41.85	1.75222e-14
27.3	41.9	1.77643e-15
27.3	41.95	1.32203e-16
27.3	42	7.22855e-18
27.3	42.05	2.90249e-19
27.3	42.1	8.55871e-21
27.3	42.15	1.85427e-22
27.3	42.2	2.94919e-24
27.3	42.25	3.4439e-26
27.35	39.7	1.06206e-07
27.35	39.75	8.28368e-07
27.35	39.8	4.87265e-06
27.35	39.85	2.15179e-05
27.35	39.9	7.09882e-05
27.35	39.95	0.000175395
27.35	40	0.000327957
27.35	40.05	0.000484152
27.35	40.1	0.000626855
27.35	40.15	0.000837709
27.35	40.2	0.00122309
27.35	40.25	0.00173838
27.35	40.3	0.00215179
27.35	40.35	0.00225903
27.35	40.4	0.00214141
27.35	40.45	0.00213103
27.35	40.5	0.00241989
27.35	40.55	0.00279006
27.35	40.6	0.00280735
27.35	40.65	0.00229016
27.35	40.7	0.00148428
27.35	40.75	0.000779936
27.35	40.8	0.000380714
27.35	40.85	0.000244757
27.35	40.9	0.000234725
27.35	40.95	0.000262227
27.35	41	0.000319827
27.35	41.05	0.000404065
27.35	41.1	0.000452498
27.35	41.15	0.000399741
27.35	41.2	0.000265168
27.35	41.25	0.000130093
27.35	41.3	4.69622e-05
27.35	41.35	1.24575e-05
27.35	41.4	2.42854e-06
27.35	41.45	3.47676e-07
27.35	41.5	3.68087e-08
27.35	41.55	3.07373e-09
27.35	41.6	3.24152e-10
27.35	41.65	8.43417e-11
27.35	41.7	2.71741e-11
27.35	41.75	6.8826e-12
27.35	41.8	1.28813e-12
27.35	41.85	1.77124e-13
27.35	41.9	1.78854e-14
27.35	41.95	1.32722e-15
27.35	42	7.23201e-17
27.35	42.05	2.89384e-18
27.35	42.1	8.4999e-20
27.35	42.15	1.83352e-21
27.35	42.2	2.90768e-23
27.35	42.25	3.38335e-25
27.4	39.7	2.26249e-07
27.4	39.75	1.67075e-06
27.4	39.8	9.39936e-06
27.4	39.85	4.0026e-05
27.4	39.9	0.000128346
27.4	39.95	0.00030893
27.4	40	0.000559741
27.4	40.05	0.000780282
27.4	40.1	0.000899287
27.4	40.15	0.00101189
27.4	40.2	0.00130889
27.4	40.25	0.0018266
27.4	40.3	0.00233687
27.4	40.35	0.0025773
27.4	40.4	0.00256519
27.4	40.45	0.00259633
27.4	40.5	0.00286444
27.4	40.55	0.00317579
27.4	40.6	0.00313081
27.4	40.65	0.00256
27.4	40.7	0.00169894
27.4	40.75	0.000943568
27.4	40.8	0.000519438
27.4	40.85	0.00039213
27.4	40.9	0.000399395
27.4	40.95	0.000429319
27.4	41	0.000481903
27.4	41.05	0.000569947
27.4	41.1	0.000619071
27.4	41.15	0.000540887
27.4	41.2	0.000357535
27.4	41.25	0.000175222
27.4	41.3	6.31698e-05
27.4	41.35	1.6749e-05
27.4	41.4	3.264e-06
27.4	41.45	4.68757e-07
27.4	41.5	5.15633e-08
27.4	41.55	6.00217e-09
27.4	41.6	1.63788e-09
27.4	41.65	6.79784e-10
27.4	41.7	2.32476e-10
27.4	41.75	5.90011e-11
27.4	41.8	1.10115e-11
27.4	41.85	1.50919e-12
27.4	41.9	1.5194e-13
27.4	41.95	1.12329e-14
27.4	42	6.09903e-16
27.4	42.05	2.432e-17
27.4	42.1	7.1213e-19
27.4	42.15	1.53185e-20
27.4	42.2	2.41989e-22
27.4	42.25	2.80735e-24
27.45	39.7	4.42638e-07
27.45	39.75	3.06335e-06
27.45	39.8	1.62647e-05
27.45	39.85	6.59893e-05
27.45	39.9	0.000203416
27.45	39.95	0.000473773
27.45	40	0.000832866
27.45	40.05	0.00111412
27.45	40.1	0.00118383
27.45	40.15	0.00114422
27.45	40.2	0.00126495
27.45	40.25	0.00167403
27.45	40.3	0.00219503
27.45	40.35	0.00255135
27.45	40.4	0.00270184
27.45	40.45	0.00286444
27.45	40.5	0.00317752
27.45	40.55	0.00346638
27.45	40.6	0.00338508
27.45	40.65	0.00279006
27.45	40.7	0.0019027
27.45	40.75	0.0011155
27.45	40.8	0.000675287
27.45	40.85	0.000559914
27.45	40.9	0.000582574
27.45	40.95	0.000601947
27.45	41	0.000623914
27.45	41.05	0.000684455
27.45	41.1	0.000715244
27.45	41.15	0.000615784
27.45	41.2	0.000405103
27.45	41.25	0.000198054
27.45	41.3	7.14033e-05
27.45	41.35	1.89233e-05
27.45	41.4	3.69471e-06
27.45	41.45	5.42617e-07
27.45	41.5	7.39806e-08
27.45	41.55	2.04973e-08
27.45	41.6	1.06188e-08
27.45	41.65	4.88476e-09
27.45	41.7	1.68216e-09
27.45	41.75	4.26206e-10
27.45	41.8	7.92909e-11
27.45	41.85	1.08333e-11
27.45	41.9	1.08731e-12
27.45	41.95	8.01385e-14
27.45	42	4.33817e-15
27.45	42.05	1.72472e-16
27.45	42.1	5.03352e-18
27.45	42.15	1.07953e-19
27.45	42.2	1.69998e-21
27.45	42.25	1.9667e-23
27.5	39.7	8.00174e-07
27.5	39.75	5.18228e-06
27.5	39.8	2.5773e-05
27.5	39.85	9.8439e-05
27.5	39.9	0.000288173
27.5	39.95	0.000643806
27.5	40	0.00109302
27.5	40.05	0.00141146
27.5	40.1	0.00141769
27.5	40.15	0.00121583
27.5	40.2	0.00112744
27.5	40.25	0.00135248
27.5	40.3	0.00178681
27.5	40.35	0.00219849
27.5	40.4	0.00251157
27.5	40.45	0.00284714
27.5	40.5	0.00326573
27.5	40.55	0.00359265
27.5	40.6	0.00353384
27.5	40.65	0.0029613
27.5	40.7	0.00207568
27.5	40.75	0.00126772
27.5	40.8	0.00080986
27.5	40.85	0.000697774
27.5	40.9	0.000726487
27.5	40.95	0.00072666
27.5	41	0.000700368
27.5	41.05	0.00070746
27.5	41.1	0.000702617
27.5	41.15	0.000592087
27.5	41.2	0.000386422
27.5	41.25	0.000188368
27.5	41.3	6.78401e-05
27.5	41.35	1.79892e-05
27.5	41.4	3.55806e-06
27.5	41.45	5.97449e-07
27.5	41.5	1.67438e-07
27.5	41.55	1.03836e-07
27.5	41.6	6.3879e-08
27.5	41.65	2.98206e-08
27.5	41.7	1.02573e-08
27.5	41.75	2.59114e-09
27.5	41.8	4.80865e-10
27.5	41.85	6.55222e-11
27.5	41.9	6.55741e-12
27.5	41.95	4.81903e-13
27.5	42	2.60152e-14
27.5	42.05	1.03144e-15
27.5	42.1	3.00281e-17
27.5	42.15	6.41903e-19
27.5	42.2	1.00791e-20
27.5	42.25	1.16255e-22
27.55	39.7	1.31857e-06
27.55	39.75	8.07439e-06
27.55	39.8	3.77254e-05
27.55	39.85	0.000135265
27.55	39.9	0.000373276
27.55	39.95	0.000792736
27.55	40	0.00129194
27.55	40.05	0.00161263
27.55	40.1	0.00155624
27.55	40.15	0.00122794
27.55	40.2	0.000960174
27.55	40.25	0.000987331
27.55	40.3	0.00127499
27.55	40.35	0.00166141
27.55	40.4	0.00207395
27.55	40.45	0.00255308
27.55	40.5	0.0030893
27.55	40.55	0.00350271
27.55	40.6	0.00352
27.55	40.65	0.00301146
27.55	40.7	0.00215698
27.55	40.75	0.00134573
27.55	40.8	0.000873168
27.55	40.85	0.00075399
27.55	40.9	0.000782185
27.55	40.95	0.000768866
27.55	41	0.00070106
27.55	41.05	0.000648476
27.55	41.1	0.000599352
27.55	41.15	0.000486228
27.55	41.2	0.000312044
27.55	41.25	0.000151075
27.55	41.3	5.4279e-05
27.55	41.35	1.44917e-05
27.55	41.4	3.1066e-06
27.55	41.45	9.04477e-07
27.55	41.5	6.37925e-07
27.55	41.55	5.19438e-07
27.55	41.6	3.28649e-07
27.55	41.65	1.53462e-07
27.55	41.7	5.2653e-08
27.55	41.75	1.32705e-08
27.55	41.8	2.45622e-09
27.55	41.85	3.33838e-10
27.55	41.9	3.33319e-11
27.55	41.95	2.44238e-12
27.55	42	1.31546e-13
27.55	42.05	5.2013e-15
27.55	42.1	1.51023e-16
27.55	42.15	3.22076e-18
27.55	42.2	5.04563e-20
27.55	42.25	5.80325e-22
27.6	39.7	1.9373e-06
27.6	39.75	1.13868e-05
27.6	39.8	5.06465e-05
27.6	39.85	0.000171814
27.6	39.9	0.000448
27.6	39.95	0.000903093
27.6	40	0.00141042
27.6	40.05	0.00170724
27.6	40.1	0.0016083
27.6	40.15	0.00121496
27.6	40.2	0.000834076
27.6	40.25	0.000697947
27.6	40.3	0.000825774
27.6	40.35	0.00112796
27.6	40.4	0.00155347
27.6	40.45	0.00209816
27.6	40.5	0.00270703
27.6	40.55	0.00319308
27.6	40.6	0.00329341
27.6	40.65	0.00286616
27.6	40.7	0.00207568
27.6	40.75	0.00129868
27.6	40.8	0.000834422
27.6	40.85	0.000714552
27.6	40.9	0.000751222
27.6	40.95	0.000750703
27.6	41	0.000671309
27.6	41.05	0.000570811
27.6	41.1	0.000473427
27.6	41.15	0.000354941
27.6	41.2	0.000217946
27.6	41.25	0.000103317
27.6	41.3	3.69125e-05
27.6	41.35	1.02954e-05
27.6	41.4	3.25535e-06
27.6	41.45	2.47698e-06
27.6	41.5	2.62746e-06
27.6	41.55	2.24865e-06
27.6	41.6	1.42599e-06
27.6	41.65	6.64736e-07
27.6	41.7	2.27633e-07
27.6	41.75	5.72195e-08
27.6	41.8	1.05669e-08
27.6	41.85	1.43291e-09
27.6	41.9	1.4272e-10
27.6	41.95	1.04389e-11
27.6	42	5.60779e-13
27.6	42.05	2.21233e-14
27.6	42.1	6.40865e-16
27.6	42.15	1.36389e-17
27.6	42.2	2.13103e-19
27.6	42.25	2.44584e-21
27.65	39.7	2.48043e-06
27.65	39.75	1.42046e-05
27.65	39.8	6.10941e-05
27.65	39.85	0.000199092
27.65	39.9	0.000496779
27.65	39.95	0.000959655
27.65	40	0.00144917
27.65	40.05	0.00172212
27.65	40.1	0.00162197
27.65	40.15	0.00123261
27.65	40.2	0.000808131
27.65	40.25	0.00055853
27.65	40.3	0.000543136
27.65	40.35	0.000735309
27.65	40.4	0.00110962
27.65	40.45	0.00164048
27.65	40.5	0.00224346
27.65	40.55	0.00273471
27.65	40.6	0.00286789
27.65	40.65	0.00251157
27.65	40.7	0.00181449
27.65	40.75	0.00112156
27.65	40.8	0.000709709
27.65	40.85	0.000619244
27.65	40.9	0.000695525
27.65	40.95	0.00074932
27.65	41	0.000694141
27.65	41.05	0.000558184
27.65	41.1	0.000401125
27.65	41.15	0.000257384
27.65	41.2	0.000141094
27.65	41.25	6.26855e-05
27.65	41.3	2.22098e-05
27.65	41.35	7.87374e-06
27.65	41.4	6.14228e-06
27.65	41.45	8.26639e-06
27.65	41.5	9.54812e-06
27.65	41.55	8.22314e-06
27.65	41.6	5.20822e-06
27.65	41.65	2.42335e-06
27.65	41.7	8.28022e-07
27.65	41.75	2.07741e-07
27.65	41.8	3.82963e-08
27.65	41.85	5.18228e-09
27.65	41.9	5.15114e-10
27.65	41.95	3.76044e-11
27.65	42	2.01514e-12
27.65	42.05	7.93774e-14
27.65	42.1	2.29535e-15
27.65	42.15	4.87265e-17
27.65	42.2	7.60044e-19
27.65	42.25	8.70574e-21
27.7	39.7	2.72087e-06
27.7	39.75	1.53479e-05
27.7	39.8	6.47093e-05
27.7	39.85	0.000205838
27.7	39.9	0.000500065
27.7	39.95	0.000942877
27.7	40	0.00140402
27.7	40.05	0.00167974
27.7	40.1	0.00163892
27.7	40.15	0.00132636
27.7	40.2	0.000919698
27.7	40.25	0.000597795
27.7	40.3	0.000459417
27.7	40.35	0.000537773
27.7	40.4	0.000832866
27.7	40.45	0.0012992
27.7	40.5	0.00182487
27.7	40.55	0.00223308
27.7	40.6	0.00232476
27.7	40.65	0.00200995
27.7	40.7	0.00142651
27.7	40.75	0.000865385
27.7	40.8	0.000553341
27.7	40.85	0.000536044
27.7	40.9	0.000696736
27.7	40.95	0.000845839
27.7	41	0.000838228
27.7	41.05	0.000663179
27.7	41.1	0.000423265
27.7	41.15	0.000223308
27.7	41.2	9.95979e-05
27.7	41.25	3.79849e-05
27.7	41.3	1.39555e-05
27.7	41.35	1.00273e-05
27.7	41.4	1.62266e-05
27.7	41.45	2.51503e-05
27.7	41.5	2.94054e-05
27.7	41.55	2.5306e-05
27.7	41.6	1.60069e-05
27.7	41.65	7.43439e-06
27.7	41.7	2.53579e-06
27.7	41.75	6.3533e-07
27.7	41.8	1.16878e-07
27.7	41.85	1.5789e-08
27.7	41.9	1.56662e-09
27.7	41.95	1.14162e-10
27.7	42	6.10941e-12
27.7	42.05	2.40087e-13
27.7	42.1	6.93103e-15
27.7	42.15	1.46923e-16
27.7	42.2	2.28843e-18
27.7	42.25	2.61535e-20
27.75	39.7	2.52714e-06
27.75	39.75	1.41544e-05
27.75	39.8	5.91222e-05
27.75	39.85	0.000186119
27.75	39.9	0.000447827
27.75	39.95	0.000842206
27.75	40	0.00127187
27.75	40.05	0.0015872
27.75	40.1	0.0016749
27.75	40.15	0.00151542
27.75	40.2	0.00118487
27.75	40.25	0.000820066
27.75	40.3	0.000565795
27.75	40.35	0.000527049
27.75	40.4	0.000730639
27.75	40.45	0.0011053
27.75	40.5	0.00150452
27.75	40.55	0.00176606
27.75	40.6	0.0017626
27.75	40.65	0.0014675
27.75	40.7	0.00100895
27.75	40.75	0.000603676
27.75	40.8	0.000422054
27.75	40.85	0.000513903
27.75	40.9	0.000794812
27.75	40.95	0.00106206
27.75	41	0.00110236
27.75	41.05	0.000871612
27.75	41.1	0.000525319
27.75	41.15	0.000244238
27.75	41.2	8.99114e-05
27.75	41.25	2.83676e-05
27.75	41.3	1.30404e-05
27.75	41.35	2.02033e-05
27.75	41.4	4.10811e-05
27.75	41.45	6.51417e-05
27.75	41.5	7.62293e-05
27.75	41.55	6.55568e-05
27.75	41.6	4.13925e-05
27.75	41.65	1.92e-05
27.75	41.7	6.53838e-06
27.75	41.75	1.63546e-06
27.75	41.8	3.00454e-07
27.75	41.85	4.05276e-08
27.75	41.9	4.01471e-09
27.75	41.95	2.92152e-10
27.75	42	1.56143e-11
27.75	42.05	6.12844e-13
27.75	42.1	1.76606e-14
27.75	42.15	3.73795e-16
27.75	42.2	5.8119e-18
27.75	42.25	6.63525e-20
27.8	39.7	1.97881e-06
27.8	39.75	1.10599e-05
27.8	39.8	4.61492e-05
27.8	39.85	0.000145505
27.8	39.9	0.000353211
27.8	39.95	0.00068013
27.8	40	0.00107953
27.8	40.05	0.00146681
27.8	40.1	0.00174184
27.8	40.15	0.00180065
27.8	40.2	0.00159706
27.8	40.25	0.00120977
27.8	40.3	0.000835114
27.8	40.35	0.000665082
27.8	40.4	0.000760909
27.8	40.45	0.00102193
27.8	40.5	0.00126945
27.8	40.55	0.00136424
27.8	40.6	0.001257
27.8	40.65	0.000981623
27.8	40.7	0.00064519
27.8	40.75	0.000391957
27.8	40.8	0.000343006
27.8	40.85	0.000554033
27.8	40.9	0.000961558
27.8	40.95	0.00133639
27.8	41	0.00140437
27.8	41.05	0.00110513
27.8	41.1	0.000650206
27.8	41.15	0.000286962
27.8	41.2	9.6346e-05
27.8	41.25	2.80044e-05
27.8	41.3	1.8906e-05
27.8	41.35	4.19979e-05
27.8	41.4	8.94098e-05
27.8	41.45	0.000142184
27.8	41.5	0.000166262
27.8	41.55	0.000142789
27.8	41.6	9.00498e-05
27.8	41.65	4.17211e-05
27.8	41.7	1.41907e-05
27.8	41.75	3.54595e-06
27.8	41.8	6.50552e-07
27.8	41.85	8.76455e-08
27.8	41.9	8.67287e-09
27.8	41.95	6.30314e-10
27.8	42	3.36433e-11
27.8	42.05	1.31892e-12
27.8	42.1	3.79676e-14
27.8	42.15	8.02595e-16
27.8	42.2	1.24627e-17
27.8	42.25	1.42115e-19
27.85	39.7	1.30577e-06
27.85	39.75	7.34098e-06
27.85	39.8	3.09449e-05
27.85	39.85	9.9425e-05
27.85	39.9	0.000249946
27.85	39.95	0.000512001
27.85	40	0.000894617
27.85	40.05	0.00137635
27.85	40.1	0.00186465
27.85	40.15	0.00217254
27.85	40.2	0.00211719
27.85	40.25	0.00171676
27.85	40.3	0.001216
27.85	40.35	0.000901017
27.85	40.4	0.000870574
27.85	40.45	0.000999093
27.85	40.5	0.00108869
27.85	40.55	0.00103421
27.85	40.6	0.000850509
27.85	40.65	0.000605579
27.85	40.7	0.000377254
27.85	40.75	0.000249773
27.85	40.8	0.000309968
27.85	40.85	0.000619763
27.85	40.9	0.0011226
27.85	40.95	0.00156281
27.85	41	0.0016301
27.85	41.05	0.00126859
27.85	41.1	0.000735482
27.85	41.15	0.000317925
27.85	41.2	0.000103611
27.85	41.25	3.11352e-05
27.85	41.3	3.02011e-05
27.85	41.35	7.63676e-05
27.85	41.4	0.000164117
27.85	41.45	0.000261016
27.85	41.5	0.000304952
27.85	41.55	0.000261535
27.85	41.6	0.000164843
27.85	41.65	7.62812e-05
27.85	41.7	2.59287e-05
27.85	41.75	6.47093e-06
27.85	41.8	1.18625e-06
27.85	41.85	1.59672e-07
27.85	41.9	1.57855e-08
27.85	41.95	1.14629e-09
27.85	42	6.11287e-11
27.85	42.05	2.39395e-12
27.85	42.1	6.88433e-14
27.85	42.15	1.45401e-15
27.85	42.2	2.25557e-17
27.85	42.25	2.57038e-19
27.9	39.7	7.40671e-07
27.9	39.75	4.2586e-06
27.9	39.8	1.86119e-05
27.9	39.85	6.32044e-05
27.9	39.9	0.000172817
27.9	39.95	0.0003968
27.9	40	0.000791352
27.9	40.05	0.00138154
27.9	40.1	0.00207222
27.9	40.15	0.0025946
27.9	40.2	0.00266206
27.9	40.25	0.00224
27.9	40.3	0.00162007
27.9	40.35	0.00116688
27.9	40.4	0.00100861
27.9	40.45	0.001001
27.9	40.5	0.000945817
27.9	40.55	0.000777687
27.9	40.6	0.000554552
27.9	40.65	0.000349406
27.9	40.7	0.000206357
27.9	40.75	0.000167023
27.9	40.8	0.000298725
27.9	40.85	0.000665428
27.9	40.9	0.00120874
27.9	40.95	0.00166002
27.9	41	0.00170673
27.9	41.05	0.00131131
27.9	41.1	0.000752433
27.9	41.15	0.000322422
27.9	41.2	0.000104753
27.9	41.25	3.4439e-05
27.9	41.3	4.40736e-05
27.9	41.35	0.000117622
27.9	41.4	0.000253406
27.9	41.45	0.000402681
27.9	41.5	0.000470141
27.9	41.55	0.0004032
27.9	41.6	0.000253925
27.9	41.65	0.000117397
27.9	41.7	3.98703e-05
27.9	41.75	9.94596e-06
27.9	41.8	1.82141e-06
27.9	41.85	2.45103e-07
27.9	41.9	2.42162e-08
27.9	41.95	1.75741e-09
27.9	42	9.36304e-11
27.9	42.05	3.6653e-12
27.9	42.1	1.05306e-13
27.9	42.15	2.2227e-15
27.9	42.2	3.44562e-17
27.9	42.25	3.93341e-19
27.95	39.7	3.88671e-07
27.95	39.75	2.39395e-06
27.95	39.8	1.14837e-05
27.95	39.85	4.39525e-05
27.95	39.9	0.00013779
27.95	39.95	0.000361514
27.95	40	0.000802768
27.95	40.05	0.00150262
27.95	40.1	0.00234033
27.95	40.15	0.00299071
27.95	40.2	0.00310833
27.95	40.25	0.00264649
27.95	40.3	0.0019373
27.95	40.35	0.00138396
27.95	40.4	0.00112363
27.95	40.45	0.00100082
27.95	40.5	0.00083252
27.95	40.55	0.000592952
27.95	40.6	0.000360822
27.95	40.65	0.000195806
27.95	40.7	0.000110858
27.95	40.75	0.000122102
27.95	40.8	0.000285406
27.95	40.85	0.000661622
27.95	40.9	0.00119057
27.95	40.95	0.00161297
27.95	41	0.00164048
27.95	41.05	0.00125267
27.95	41.1	0.000718012
27.95	41.15	0.000309103
27.95	41.2	0.00010195
27.95	41.25	3.69125e-05
27.95	41.3	5.59222e-05
27.95	41.35	0.000152545
27.95	41.4	0.000328822
27.95	41.45	0.000522552
27.95	41.5	0.00060973
27.95	41.55	0.000522552
27.95	41.6	0.000328995
27.95	41.65	0.000152061
27.95	41.7	5.16325e-05
27.95	41.75	1.28727e-05
27.95	41.8	2.35762e-06
27.95	41.85	3.16887e-07
27.95	41.9	3.13081e-08
27.95	41.95	2.27114e-09
27.95	42	1.20943e-10
27.95	42.05	4.73082e-12
27.95	42.1	1.35905e-13
27.95	42.15	2.86789e-15
27.95	42.2	4.44541e-17
27.95	42.25	5.4106e-19
28	39.7	2.27287e-07
28	39.75	1.60606e-06
28	39.8	8.92195e-06
28	39.85	3.92476e-05
28	39.9	0.000137842
28	39.95	0.000390054
28	40	0.000897039
28	40.05	0.00168632
28	40.1	0.0025946
28	40.15	0.00326054
28	40.2	0.0033453
28	40.25	0.00283849
28	40.3	0.00209125
28	40.35	0.00150123
28	40.4	0.00118175
28	40.45	0.000979547
28	40.5	0.000741536
28	40.55	0.000471871
28	40.6	0.000250811
28	40.65	0.000117535
28	40.7	6.48303e-05
28	40.75	9.56023e-05
28	40.8	0.000257038
28	40.85	0.000603503
28	40.9	0.00108126
28	40.95	0.0014618
28	41	0.00149189
28	41.05	0.00115114
28	41.1	0.000671655
28	41.15	0.000296303
28	41.2	0.000100913
28	41.25	3.85903e-05
28	41.3	6.08692e-05
28	41.35	0.000166417
28	41.4	0.000358746
28	41.45	0.000569774
28	41.5	0.000664909
28	41.55	0.000569774
28	41.6	0.000358573
28	41.65	0.00016576
28	41.7	5.62682e-05
28	41.75	1.40281e-05
28	41.8	2.56865e-06
28	41.85	3.45254e-07
28	41.9	3.4093e-08
28	41.95	2.47352e-09
28	42	1.31719e-10
28	42.05	5.15287e-12
28	42.1	1.47961e-13
28	42.15	3.12217e-15
28	42.2	4.90379e-17
28	42.25	1.68424e-18
28.05	39.7	1.76779e-07
28.05	39.75	1.41821e-06
28.05	39.8	8.73687e-06
28.05	39.85	4.14098e-05
28.05	39.9	0.000151974
28.05	39.95	0.000437103
28.05	40	0.000998228
28.05	40.05	0.00183352
28.05	40.1	0.00273298
28.05	40.15	0.003328
28.05	40.2	0.00333665
28.05	40.25	0.00281254
28.05	40.3	0.00210335
28.05	40.35	0.00154275
28.05	40.4	0.00120424
28.05	40.45	0.000953601
28.05	40.5	0.000682898
28.05	40.55	0.000414098
28.05	40.6	0.000211546
28.05	40.65	9.5412e-05
28.05	40.7	5.08887e-05
28.05	40.75	7.73709e-05
28.05	40.8	0.000213103
28.05	40.85	0.000504909
28.05	40.9	0.000915028
28.05	40.95	0.00125942
28.05	41	0.0013184
28.05	41.05	0.00105064
28.05	41.1	0.000636541
28.05	41.15	0.000292671
28.05	41.2	0.000103646
28.05	41.25	3.92303e-05
28.05	41.3	5.67006e-05
28.05	41.35	0.000152701
28.05	41.4	0.000328822
28.05	41.45	0.000522552
28.05	41.5	0.00060973
28.05	41.55	0.000522552
28.05	41.6	0.000328995
28.05	41.65	0.000152061
28.05	41.7	5.16325e-05
28.05	41.75	1.28727e-05
28.05	41.8	2.35762e-06
28.05	41.85	3.16887e-07
28.05	41.9	3.13081e-08
28.05	41.95	2.27114e-09
28.05	42	1.20943e-10
28.05	42.05	4.73082e-12
28.05	42.1	1.35905e-13
28.05	42.15	2.87654e-15
28.05	42.2	6.28757e-17
28.05	42.25	3.12562e-17
28.1	39.7	1.64359e-07
28.1	39.75	1.38119e-06
28.1	39.8	8.83201e-06
28.1	39.85	4.288e-05
28.1	39.9	0.000159326
28.1	39.95	0.000458552
28.1	40	0.0010368
28.1	40.05	0.00186811
28.1	40.1	0.00271222
28.1	40.15	0.00321384
28.1	40.2	0.00316368
28.1	40.25	0.00267935
28.1	40.3	0.00208087
28.1	40.35	0.00160536
28.1	40.4	0.00127412
28.1	40.45	0.000990098
28.1	40.5	0.000704001
28.1	40.55	0.000445752
28.1	40.6	0.000252195
28.1	40.65	0.000127983
28.1	40.7	6.50206e-05
28.1	40.75	6.72866e-05
28.1	40.8	0.000162923
28.1	40.85	0.00038919
28.1	40.9	0.000726833
28.1	40.95	0.00103974
28.1	41	0.00113747
28.1	41.05	0.000949623
28.1	41.1	0.000602465
28.1	41.15	0.000289038
28.1	41.2	0.000105825
28.1	41.25	3.7933e-05
28.1	41.3	4.53536e-05
28.1	41.35	0.000117881
28.1	41.4	0.000253406
28.1	41.45	0.000402681
28.1	41.5	0.000470141
28.1	41.55	0.0004032
28.1	41.6	0.000253925
28.1	41.65	0.000117397
28.1	41.7	3.98703e-05
28.1	41.75	9.94596e-06
28.1	41.8	1.82141e-06
28.1	41.85	2.45103e-07
28.1	41.9	2.42162e-08
28.1	41.95	1.75741e-09
28.1	42	9.36304e-11
28.1	42.05	3.6653e-12
28.1	42.1	1.05375e-13
28.1	42.15	2.41125e-15
28.1	42.2	4.58898e-16
28.1	42.25	7.04693e-16
28.15	39.7	1.6237e-07
28.15	39.75	1.2762e-06
28.15	39.8	8.14703e-06
28.15	39.85	3.99741e-05
28.15	39.9	0.00015021
28.15	39.95	0.000436411
28.15	40	0.00099252
28.15	40.05	0.00178854
28.15	40.1	0.00258076
28.15	40.15	0.00303395
28.15	40.2	0.00298725
28.15	40.25	0.00259633
28.15	40.3	0.0021466
28.15	40.35	0.00178508
28.15	40.4	0.00147892
28.15	40.45	0.00117189
28.15	40.5	0.000872995
28.15	40.55	0.00061492
28.15	40.6	0.000401471
28.15	40.65	0.000230054
28.15	40.7	0.000114301
28.15	40.75	7.16109e-05
28.15	40.8	0.000118884
28.15	40.85	0.000277968
28.15	40.9	0.000541579
28.15	40.95	0.000814531
28.15	41	0.000937168
28.15	41.05	0.00081972
28.15	41.1	0.000541406
28.15	41.15	0.0002688
28.15	41.2	0.000100826
28.15	41.25	3.40757e-05
28.15	41.3	3.15157e-05
28.15	41.35	7.67136e-05
28.15	41.4	0.000164203
28.15	41.45	0.000261016
28.15	41.5	0.000304952
28.15	41.55	0.000261535
28.15	41.6	0.000164843
28.15	41.65	7.62812e-05
28.15	41.7	2.59287e-05
28.15	41.75	6.47093e-06
28.15	41.8	1.18625e-06
28.15	41.85	1.59672e-07
28.15	41.9	1.57873e-08
28.15	41.95	1.14629e-09
28.15	42	6.11287e-11
28.15	42.05	2.39395e-12
28.15	42.1	7.00368e-14
28.15	42.15	5.12001e-15
28.15	42.2	8.26812e-15
28.15	42.25	1.36182e-14
28.2	39.7	2.3213e-07
28.2	39.75	1.20061e-06
28.2	39.8	6.88087e-06
28.2	39.85	3.35049e-05
28.2	39.9	0.000128294
28.2	39.95	0.000383136
28.2	40	0.000897385
28.2	40.05	0.00166175
28.2	40.1	0.00245276
28.2	40.15	0.00293535
28.2	40.2	0.00294746
28.2	40.25	0.0026586
28.2	40.3	0.0023386
28.2	40.35	0.00208606
28.2	40.4	0.00182833
28.2	40.45	0.00152545
28.2	40.5	0.00122465
28.2	40.55	0.000951698
28.2	40.6	0.000680995
28.2	40.65	0.000415481
28.2	40.7	0.000207568
28.2	40.75	9.74185e-05
28.2	40.8	9.04304e-05
28.2	40.85	0.000185773
28.2	40.9	0.000374487
28.2	40.95	0.000591741
28.2	41	0.000711957
28.2	41.05	0.000646401
28.2	41.1	0.000440217
28.2	41.15	0.000224519
28.2	41.2	8.66249e-05
28.2	41.25	2.88173e-05
28.2	41.3	2.00649e-05
28.2	41.35	4.25341e-05
28.2	41.4	8.95828e-05
28.2	41.45	0.000142236
28.2	41.5	0.000166262
28.2	41.55	0.000142789
28.2	41.6	9.00498e-05
28.2	41.65	4.17211e-05
28.2	41.7	1.41907e-05
28.2	41.75	3.54595e-06
28.2	41.8	6.50552e-07
28.2	41.85	8.76455e-08
28.2	41.9	8.6746e-09
28.2	41.95	6.30487e-10
28.2	42	3.36606e-11
28.2	42.05	1.32463e-12
28.2	42.1	5.78076e-14
28.2	42.15	6.11979e-14
28.2	42.2	1.35213e-13
28.2	42.25	2.2227e-13
28.25	39.7	6.9466e-07
28.25	39.75	1.78335e-06
28.25	39.8	6.44152e-06
28.25	39.85	2.752e-05
28.25	39.9	0.000105029
28.25	39.95	0.000324844
28.25	40	0.000798098
28.25	40.05	0.00155209
28.25	40.1	0.00239568
28.25	40.15	0.00296995
28.25	40.2	0.00306681
28.25	40.25	0.00283503
28.25	40.3	0.00257903
28.25	40.35	0.00240779
28.25	40.4	0.00222443
28.25	40.45	0.00197708
28.25	40.5	0.00170603
28.25	40.55	0.00141717
28.25	40.6	0.00106448
28.25	40.65	0.000672174
28.25	40.7	0.000343352
28.25	40.75	0.000147944
28.25	40.8	8.23698e-05
28.25	40.85	0.000119351
28.25	40.9	0.000236973
28.25	40.95	0.000387806
28.25	41	0.000482768
28.25	41.05	0.000450941
28.25	41.1	0.000315849
28.25	41.15	0.000167473
28.25	41.2	7.00195e-05
28.25	41.25	2.64303e-05
28.25	41.3	1.4867e-05
28.25	41.35	2.16735e-05
28.25	41.4	4.17038e-05
28.25	41.45	6.5332e-05
28.25	41.5	7.62985e-05
28.25	41.55	6.55741e-05
28.25	41.6	4.14098e-05
28.25	41.65	1.92173e-05
28.25	41.7	6.5453e-06
28.25	41.75	1.63788e-06
28.25	41.8	3.00973e-07
28.25	41.85	4.06487e-08
28.25	41.9	4.032e-09
28.25	41.95	2.93708e-10
28.25	42	1.5744e-11
28.25	42.05	6.86011e-13
28.25	42.1	2.944e-13
28.25	42.15	8.39612e-13
28.25	42.2	1.87157e-12
28.25	42.25	3.06335e-12
28.3	39.7	2.69665e-06
28.3	39.75	5.03352e-06
28.3	39.8	1.01431e-05
28.3	39.85	2.8333e-05
28.3	39.9	9.35612e-05
28.3	39.95	0.00028506
28.3	40	0.000722336
28.3	40.05	0.00147027
28.3	40.1	0.00237319
28.3	40.15	0.00305471
28.3	40.2	0.00322941
28.3	40.25	0.00301146
28.3	40.3	0.00274854
28.3	40.35	0.00261535
28.3	40.4	0.00252541
28.3	40.45	0.00237838
28.3	40.5	0.00217427
28.3	40.55	0.00188541
28.3	40.6	0.0014592
28.3	40.65	0.000948412
28.3	40.7	0.000503006
28.3	40.75	0.000221233
28.3	40.8	9.63287e-05
28.3	40.85	8.06574e-05
28.3	40.9	0.000136597
28.3	40.95	0.000224865
28.3	41	0.000286789
28.3	41.05	0.000276238
28.3	41.1	0.000204108
28.3	41.15	0.000122119
28.3	41.2	6.59893e-05
28.3	41.25	3.56844e-05
28.3	41.3	2.01687e-05
28.3	41.35	1.47892e-05
28.3	41.4	1.82487e-05
28.3	41.45	2.5773e-05
28.3	41.5	2.96476e-05
28.3	41.55	2.54962e-05
28.3	41.6	1.61505e-05
28.3	41.65	7.52606e-06
28.3	41.7	2.57903e-06
28.3	41.75	6.4986e-07
28.3	41.8	1.20562e-07
28.3	41.85	1.64722e-08
28.3	41.9	1.65968e-09
28.3	41.95	1.23503e-10
28.3	42	6.93622e-12
28.3	42.05	1.06742e-12
28.3	42.1	3.264e-12
28.3	42.15	9.8439e-12
28.3	42.2	2.18638e-11
28.3	42.25	3.56671e-11
28.35	39.7	9.56196e-06
28.35	39.75	1.64342e-05
28.35	39.8	2.56692e-05
28.35	39.85	4.66163e-05
28.35	39.9	0.000109578
28.35	39.95	0.000283676
28.35	40	0.00068359
28.35	40.05	0.00139676
28.35	40.1	0.00231092
28.35	40.15	0.00305644
28.35	40.2	0.00328995
28.35	40.25	0.003072
28.35	40.3	0.00277622
28.35	40.35	0.00264649
28.35	40.4	0.00262919
28.35	40.45	0.00258768
28.35	40.5	0.00245795
28.35	40.55	0.00218984
28.35	40.6	0.00173492
28.35	40.65	0.00116913
28.35	40.7	0.00065799
28.35	40.75	0.000312562
28.35	40.8	0.000132861
28.35	40.85	6.90509e-05
28.35	40.9	7.56757e-05
28.35	40.95	0.000115494
28.35	41	0.000150833
28.35	41.05	0.000156506
28.35	41.1	0.000137548
28.35	41.15	0.000114595
28.35	41.2	9.42185e-05
28.35	41.25	6.9933e-05
28.35	41.3	4.25168e-05
28.35	41.35	2.13795e-05
28.35	41.4	1.16999e-05
28.35	41.45	1.01518e-05
28.35	41.5	1.05202e-05
28.35	41.55	9.08109e-06
28.35	41.6	5.9226e-06
28.35	41.65	2.87481e-06
28.35	41.7	1.0387e-06
28.35	41.75	2.80044e-07
28.35	41.8	5.6493e-08
28.35	41.85	8.55006e-09
28.35	41.9	9.72628e-10
28.35	41.95	8.34422e-11
28.35	42	6.7719e-12
28.35	42.05	8.13666e-12
28.35	42.1	3.23287e-11
28.35	42.15	9.74012e-11
28.35	42.2	2.15525e-10
28.35	42.25	3.50271e-10
28.4	39.7	2.8973e-05
28.4	39.75	4.81557e-05
28.4	39.8	6.88779e-05
28.4	39.85	0.000101483
28.4	39.9	0.000176606
28.4	39.95	0.000349233
28.4	40	0.000708325
28.4	40.05	0.00134123
28.4	40.1	0.00218292
28.4	40.15	0.00291287
28.4	40.2	0.00318444
28.4	40.25	0.00299589
28.4	40.3	0.00268627
28.4	40.35	0.00253579
28.4	40.4	0.00253406
28.4	40.45	0.00253925
28.4	40.5	0.00245276
28.4	40.55	0.00221579
28.4	40.6	0.00180065
28.4	40.65	0.0012781
28.4	40.7	0.000784433
28.4	40.75	0.000416173
28.4	40.8	0.000190962
28.4	40.85	8.14531e-05
28.4	40.9	4.92455e-05
28.4	40.95	5.74444e-05
28.4	41	7.87201e-05
28.4	41.05	0.000102348
28.4	41.1	0.000131754
28.4	41.15	0.000163079
28.4	41.2	0.000172852
28.4	41.25	0.000143481
28.4	41.3	8.97039e-05
28.4	41.35	4.21709e-05
28.4	41.4	1.62335e-05
28.4	41.45	7.53644e-06
28.4	41.5	6.16995e-06
28.4	41.55	5.7773e-06
28.4	41.6	4.41082e-06
28.4	41.65	2.55308e-06
28.4	41.7	1.10772e-06
28.4	41.75	3.584e-07
28.4	41.8	8.62617e-08
28.4	41.85	1.54033e-08
28.4	41.9	2.03589e-09
28.4	41.95	2.00476e-10
28.4	42	2.624e-11
28.4	42.05	6.69925e-11
28.4	42.1	2.70876e-10
28.4	42.15	8.1332e-10
28.4	42.2	1.79373e-09
28.4	42.25	2.90595e-09
28.45	39.7	7.46033e-05
28.45	39.75	0.000120839
28.45	39.8	0.000165224
28.45	39.85	0.000221233
28.45	39.9	0.000326746
28.45	39.95	0.000519784
28.45	40	0.000845147
28.45	40.05	0.0013658
28.45	40.1	0.00206011
28.45	40.15	0.00269319
28.45	40.2	0.00296822
28.45	40.25	0.00283676
28.45	40.3	0.00255135
28.45	40.35	0.002368
28.45	40.4	0.00231265
28.45	40.45	0.00227633
28.45	40.5	0.00217254
28.45	40.55	0.0019667
28.45	40.6	0.00165293
28.45	40.65	0.00126703
28.45	40.7	0.000871093
28.45	40.75	0.000522898
28.45	40.8	0.000264476
28.45	40.85	0.000112588
28.45	40.9	4.93838e-05
28.45	40.95	3.94898e-05
28.45	41	5.85514e-05
28.45	41.05	0.000104908
28.45	41.1	0.000183352
28.45	41.15	0.000269492
28.45	41.2	0.000306681
28.45	41.25	0.000260843
28.45	41.3	0.000164186
28.45	41.35	7.69212e-05
28.45	41.4	2.90422e-05
28.45	41.45	1.34193e-05
28.45	41.5	1.21479e-05
28.45	41.55	1.28554e-05
28.45	41.6	1.08471e-05
28.45	41.65	6.80649e-06
28.45	41.7	3.14638e-06
28.45	41.75	1.06984e-06
28.45	41.8	2.67416e-07
28.45	41.85	4.9159e-08
28.45	41.9	6.64044e-09
28.45	41.95	6.69925e-10
28.45	42	1.32619e-10
28.45	42.05	4.72217e-10
28.45	42.1	1.91481e-09
28.45	42.15	5.73233e-09
28.45	42.2	1.26046e-08
28.45	42.25	2.03589e-08
28.5	39.7	0.000163806
28.5	39.75	0.000258595
28.5	39.8	0.000341968
28.5	39.85	0.000433817
28.5	39.9	0.000587936
28.5	39.95	0.000826466
28.5	40	0.00113678
28.5	40.05	0.00154136
28.5	40.1	0.00204973
28.5	40.15	0.00252195
28.5	40.2	0.00274508
28.5	40.25	0.00266033
28.5	40.3	0.00242162
28.5	40.35	0.00220887
28.5	40.4	0.00205838
28.5	40.45	0.00191827
28.5	40.5	0.00174876
28.5	40.55	0.0015635
28.5	40.6	0.00137462
28.5	40.65	0.00116722
28.5	40.7	0.000911914
28.5	40.75	0.000615784
28.5	40.8	0.000342833
28.5	40.85	0.000158063
28.5	40.9	7.20087e-05
28.5	40.95	5.37601e-05
28.5	41	7.80455e-05
28.5	41.05	0.000148324
28.5	41.1	0.000272779
28.5	41.15	0.000411157
28.5	41.2	0.000472217
28.5	41.25	0.000402854
28.5	41.3	0.000253925
28.5	41.35	0.000120095
28.5	41.4	4.87265e-05
28.5	41.45	2.93708e-05
28.5	41.5	3.28303e-05
28.5	41.55	3.65665e-05
28.5	41.6	3.12735e-05
28.5	41.65	1.97535e-05
28.5	41.7	9.16412e-06
28.5	41.75	3.12389e-06
28.5	41.8	7.82185e-07
28.5	41.85	1.43793e-07
28.5	41.9	1.94249e-08
28.5	41.95	1.99438e-09
28.5	42	6.47611e-10
28.5	42.05	2.816e-09
28.5	42.1	1.14162e-08
28.5	42.15	3.4093e-08
28.5	42.2	7.47417e-08
28.5	42.25	1.20355e-07
28.55	39.7	0.000308757
28.55	39.75	0.0004736
28.55	39.8	0.000608692
28.55	39.85	0.00074413
28.55	39.9	0.000960001
28.55	39.95	0.00126322
28.55	40	0.00157942
28.55	40.05	0.00188714
28.55	40.1	0.00221233
28.55	40.15	0.00249254
28.55	40.2	0.00260152
28.55	40.25	0.00250811
28.55	40.3	0.00230746
28.55	40.35	0.00208087
28.55	40.4	0.00184908
28.55	40.45	0.00159533
28.55	40.5	0.00134521
28.55	40.55	0.00116013
28.55	40.6	0.0010707
28.55	40.65	0.00102089
28.55	40.7	0.000905341
28.55	40.75	0.000682552
28.55	40.8	0.000421536
28.55	40.85	0.000222098
28.55	40.9	0.000123503
28.55	40.95	0.000104147
28.55	41	0.00013523
28.55	41.05	0.000219849
28.55	41.1	0.0003712
28.55	41.15	0.000542098
28.55	41.2	0.000616303
28.55	41.25	0.000524282
28.55	41.3	0.000330898
28.55	41.35	0.000159568
28.55	41.4	7.39806e-05
28.55	41.45	6.14574e-05
28.55	41.5	7.97925e-05
28.55	41.55	9.09493e-05
28.55	41.6	7.79417e-05
28.55	41.65	4.91936e-05
28.55	41.7	2.27979e-05
28.55	41.75	7.76476e-06
28.55	41.8	1.94076e-06
28.55	41.85	3.56498e-07
28.55	41.9	4.81211e-08
28.55	41.95	5.10444e-09
28.55	42	2.91114e-09
28.55	42.05	1.41821e-08
28.55	42.1	5.74444e-08
28.55	42.15	1.71036e-07
28.55	42.2	3.74141e-07
28.55	42.25	6.00909e-07
28.6	39.7	0.000503352
28.6	39.75	0.000747936
28.6	39.8	0.000934574
28.6	39.85	0.0011117
28.6	39.9	0.00139261
28.6	39.95	0.00176779
28.6	40	0.00210335
28.6	40.05	0.00234206
28.6	40.1	0.00252541
28.6	40.15	0.00262746
28.6	40.2	0.00258076
28.6	40.25	0.00241471
28.6	40.3	0.00221233
28.6	40.35	0.00199438
28.6	40.4	0.00172696
28.6	40.45	0.00140074
28.6	40.5	0.00107831
28.6	40.55	0.000866941
28.6	40.6	0.000820931
28.6	40.65	0.000870574
28.6	40.7	0.000870401
28.6	40.75	0.000737385
28.6	40.8	0.000519092
28.6	40.85	0.000324498
28.6	40.9	0.000221752
28.6	40.95	0.000205665
28.6	41	0.000239395
28.6	41.05	0.00031533
28.6	41.1	0.000452671
28.6	41.15	0.000614228
28.6	41.2	0.000680649
28.6	41.25	0.00057479
28.6	41.3	0.000363417
28.6	41.35	0.000181968
28.6	41.4	0.000103559
28.6	41.45	0.00011648
28.6	41.5	0.000165656
28.6	41.55	0.000190962
28.6	41.6	0.000163754
28.6	41.65	0.000103248
28.6	41.7	4.78098e-05
28.6	41.75	1.62612e-05
28.6	41.8	4.06141e-06
28.6	41.85	7.44995e-07
28.6	41.9	1.00515e-07
28.6	41.95	1.13886e-08
28.6	42	1.16567e-08
28.6	42.05	6.02811e-08
28.6	42.1	2.43719e-07
28.6	42.15	7.24239e-07
28.6	42.2	1.58028e-06
28.6	42.25	2.53233e-06
28.65	39.7	0.00071559
28.65	39.75	0.00102884
28.65	39.8	0.00124835
28.65	39.85	0.00145055
28.65	39.9	0.00178335
28.65	39.95	0.0022227
28.65	40	0.00258422
28.65	40.05	0.00279352
28.65	40.1	0.00290422
28.65	40.15	0.00289384
28.65	40.2	0.00271049
28.65	40.25	0.00243546
28.65	40.3	0.00218984
28.65	40.35	0.00198227
28.65	40.4	0.00172523
28.65	40.45	0.00137306
28.65	40.5	0.000994769
28.65	40.55	0.000733233
28.65	40.6	0.000676498
28.65	40.65	0.000770076
28.65	40.7	0.000861925
28.65	40.75	0.000830444
28.65	40.8	0.000674768
28.65	40.85	0.000492973
28.65	40.9	0.000385557
28.65	40.95	0.00037293
28.65	41	0.00040199
28.65	41.05	0.000439871
28.65	41.1	0.000511482
28.65	41.15	0.000609903
28.65	41.2	0.000641557
28.65	41.25	0.000532584
28.65	41.3	0.000337817
28.65	41.35	0.000180757
28.65	41.4	0.000135507
28.65	41.45	0.000194595
28.65	41.5	0.000291287
28.65	41.55	0.000337817
28.65	41.6	0.000289557
28.65	41.65	0.000182314
28.65	41.7	8.43936e-05
28.65	41.75	2.86789e-05
28.65	41.8	7.15763e-06
28.65	41.85	1.31166e-06
28.65	41.9	1.77124e-07
28.65	41.95	2.27114e-08
28.65	42	4.05795e-08
28.65	42.05	2.16216e-07
28.65	42.1	8.7265e-07
28.65	42.15	2.58768e-06
28.65	42.2	5.63546e-06
28.65	42.25	9.0119e-06
28.7	39.7	0.000896001
28.7	39.75	0.001248
28.7	39.8	0.00146854
28.7	39.85	0.00166417
28.7	39.9	0.00201514
28.7	39.95	0.00248735
28.7	40	0.00287654
28.7	40.05	0.00310833
28.7	40.1	0.00324325
28.7	40.15	0.00324152
28.7	40.2	0.00301319
28.7	40.25	0.00264822
28.7	40.3	0.00233687
28.7	40.35	0.00212238
28.7	40.4	0.00189233
28.7	40.45	0.00153721
28.7	40.5	0.0011117
28.7	40.55	0.000786509
28.7	40.6	0.00068826
28.7	40.65	0.00079239
28.7	40.7	0.000954639
28.7	40.75	0.00101674
28.7	40.8	0.000917277
28.7	40.85	0.000736174
28.7	40.9	0.00061492
28.7	40.95	0.000603676
28.7	41	0.000623222
28.7	41.05	0.000601255
28.7	41.1	0.000565968
28.7	41.15	0.000557146
28.7	41.2	0.000528952
28.7	41.25	0.000422054
28.7	41.3	0.000268108
28.7	41.35	0.000160363
28.7	41.4	0.000164982
28.7	41.45	0.000280735
28.7	41.5	0.00043226
28.7	41.55	0.00050266
28.7	41.6	0.000430703
28.7	41.65	0.000271222
28.7	41.7	0.000125406
28.7	41.75	4.2586e-05
28.7	41.8	1.06223e-05
28.7	41.85	1.94595e-06
28.7	41.9	2.63265e-07
28.7	41.95	4.17903e-08
28.7	42	1.21029e-07
28.7	42.05	6.54011e-07
28.7	42.1	2.63611e-06
28.7	42.15	7.80282e-06
28.7	42.2	1.69617e-05
28.7	42.25	2.70876e-05
28.75	39.7	0.000999266
28.75	39.75	0.00135749
28.75	39.8	0.00155036
28.75	39.85	0.00170154
28.75	39.9	0.00201341
28.75	39.95	0.00247006
28.75	40	0.00287827
28.75	40.05	0.00318444
28.75	40.1	0.003456
28.75	40.15	0.00360995
28.75	40.2	0.00347676
28.75	40.25	0.00310833
28.75	40.3	0.00274681
28.75	40.35	0.00252368
28.75	40.4	0.00231265
28.75	40.45	0.0019546
28.75	40.5	0.00147719
28.75	40.55	0.00108316
28.75	40.6	0.000932152
28.75	40.65	0.00101933
28.75	40.7	0.0012058
28.75	40.75	0.00130923
28.75	40.8	0.00122309
28.75	40.85	0.00101933
28.75	40.9	0.000879222
28.75	40.95	0.000874552
28.75	41	0.000890466
28.75	41.05	0.000805882
28.75	41.1	0.000649687
28.75	41.15	0.000512692
28.75	41.2	0.000407698
28.75	41.25	0.000296822
28.75	41.3	0.000186292
28.75	41.35	0.000130941
28.75	41.4	0.000182833
28.75	41.45	0.000345773
28.75	41.5	0.000540195
28.75	41.55	0.000629276
28.75	41.6	0.000539157
28.75	41.65	0.000339373
28.75	41.7	0.000156869
28.75	41.75	5.32584e-05
28.75	41.8	1.32774e-05
28.75	41.85	2.432e-06
28.75	41.9	3.30898e-07
28.75	41.95	7.30812e-08
28.75	42	3.06854e-07
28.75	42.05	1.66867e-06
28.75	42.1	6.71655e-06
28.75	42.15	1.98573e-05
28.75	42.2	4.30876e-05
28.75	42.25	6.86876e-05
28.8	39.7	0.00100895
28.8	39.75	0.00135317
28.8	39.8	0.00150729
28.8	39.85	0.00158461
28.8	39.9	0.00179719
28.8	39.95	0.00217427
28.8	40	0.00258076
28.8	40.05	0.00299935
28.8	40.1	0.00349233
28.8	40.15	0.00392649
28.8	40.2	0.00402509
28.8	40.25	0.0037639
28.8	40.3	0.0034266
28.8	40.35	0.00323114
28.8	40.4	0.00306162
28.8	40.45	0.00270011
28.8	40.5	0.00216908
28.8	40.55	0.00170984
28.8	40.6	0.00150158
28.8	40.65	0.00152441
28.8	40.7	0.00163546
28.8	40.75	0.00166642
28.8	40.8	0.00151957
28.8	40.85	0.0012762
28.8	40.9	0.0011347
28.8	40.95	0.00115961
28.8	41	0.00119057
28.8	41.05	0.00105963
28.8	41.1	0.000793947
28.8	41.15	0.000529644
28.8	41.2	0.000337298
28.8	41.25	0.000205492
28.8	41.3	0.000120701
28.8	41.35	0.000101276
28.8	41.4	0.000179892
28.8	41.45	0.000360995
28.8	41.5	0.000568563
28.8	41.55	0.00066266
28.8	41.6	0.000567871
28.8	41.65	0.000357363
28.8	41.7	0.000165189
28.8	41.75	5.60779e-05
28.8	41.8	1.39797e-05
28.8	41.85	2.56e-06
28.8	41.9	3.52865e-07
28.8	41.95	1.22015e-07
28.8	42	6.58509e-07
28.8	42.05	3.59092e-06
28.8	42.1	1.44363e-05
28.8	42.15	4.26206e-05
28.8	42.2	9.24023e-05
28.8	42.25	0.000147131
28.85	39.7	0.000946163
28.85	39.75	0.00126945
28.85	39.8	0.00138967
28.85	39.85	0.00138638
28.85	39.9	0.0014656
28.85	39.95	0.00171468
28.85	40	0.00208779
28.85	40.05	0.00261362
28.85	40.1	0.0033453
28.85	40.15	0.00409773
28.85	40.2	0.00449557
28.85	40.25	0.00443157
28.85	40.3	0.00421881
28.85	40.35	0.00414617
28.85	40.4	0.00409081
28.85	40.45	0.00376736
28.85	40.5	0.00320692
28.85	40.55	0.00271049
28.85	40.6	0.00245103
28.85	40.65	0.00234206
28.85	40.7	0.00222962
28.85	40.75	0.0020307
28.85	40.8	0.00173665
28.85	40.85	0.00145661
28.85	40.9	0.00135732
28.85	40.95	0.00145021
28.85	41	0.00152026
28.85	41.05	0.00136476
28.85	41.1	0.00101016
28.85	41.15	0.000628757
28.85	41.2	0.000341622
28.85	41.25	0.00016787
28.85	41.3	8.34422e-05
28.85	41.35	7.56066e-05
28.85	41.4	0.000153981
28.85	41.45	0.000318271
28.85	41.5	0.000503352
28.85	41.55	0.000587071
28.85	41.6	0.000503179
28.85	41.65	0.000316714
28.85	41.7	0.000146422
28.85	41.75	4.97125e-05
28.85	41.8	1.2397e-05
28.85	41.85	2.27114e-06
28.85	41.9	3.21038e-07
28.85	41.95	1.9027e-07
28.85	42	1.19421e-06
28.85	42.05	6.51763e-06
28.85	42.1	2.61708e-05
28.85	42.15	7.72152e-05
28.85	42.2	0.000167248
28.85	42.25	0.000266033
28.9	39.7	0.000857428
28.9	39.75	0.00115494
28.9	39.8	0.00124921
28.9	39.85	0.00118227
28.9	39.9	0.00114024
28.9	39.95	0.00125579
28.9	40	0.00156541
28.9	40.05	0.00214141
28.9	40.1	0.00303741
28.9	40.15	0.00403546
28.9	40.2	0.00469276
28.9	40.25	0.00484844
28.9	40.3	0.00483979
28.9	40.35	0.00500065
28.9	40.4	0.00515806
28.9	40.45	0.00495568
28.9	40.5	0.00444022
28.9	40.55	0.00397838
28.9	40.6	0.0036999
28.9	40.65	0.00340238
28.9	40.7	0.00293017
28.9	40.75	0.00236108
28.9	40.8	0.00185946
28.9	40.85	0.00156281
28.9	40.9	0.00155451
28.9	40.95	0.0017453
28.9	41	0.00186292
28.9	41.05	0.0016922
28.9	41.1	0.00126634
28.9	41.15	0.000782185
28.9	41.2	0.000401817
28.9	41.25	0.000173492
28.9	41.3	7.04693e-05
28.9	41.35	5.53168e-05
28.9	41.4	0.000113557
28.9	41.45	0.000236627
28.9	41.5	0.000374833
28.9	41.55	0.000437449
28.9	41.6	0.000375179
28.9	41.65	0.000236281
28.9	41.7	0.000109267
28.9	41.75	3.712e-05
28.9	41.8	9.25925e-06
28.9	41.85	1.6979e-06
28.9	41.9	2.52368e-07
28.9	41.95	2.67935e-07
28.9	42	1.82833e-06
28.9	42.05	9.97709e-06
28.9	42.1	4.00433e-05
28.9	42.15	0.000118037
28.9	42.2	0.000255481
28.9	42.25	0.000406141
28.95	39.7	0.000791352
28.95	39.75	0.00105323
28.95	39.8	0.00112311
28.95	39.85	0.00102469
28.95	39.9	0.000915547
28.95	39.95	0.000935958
28.95	40	0.00116584
28.95	40.05	0.0017107
28.95	40.1	0.00263092
28.95	40.15	0.00370854
28.95	40.2	0.00449557
28.95	40.25	0.00482076
28.95	40.3	0.00503525
28.95	40.35	0.00547633
28.95	40.4	0.00591222
28.95	40.45	0.00591568
28.95	40.5	0.00554725
28.95	40.55	0.00521514
28.95	40.6	0.00497644
28.95	40.65	0.00448346
28.95	40.7	0.00359957
28.95	40.75	0.00261881
28.95	40.8	0.00190962
28.95	40.85	0.00163166
28.95	40.9	0.00173665
28.95	40.95	0.00201168
28.95	41	0.00215006
28.95	41.05	0.00195633
28.95	41.1	0.00147633
28.95	41.15	0.000919698
28.95	41.2	0.000469622
28.95	41.25	0.000195287
28.95	41.3	7.07287e-05
28.95	41.35	4.13579e-05
28.95	41.4	7.28563e-05
28.95	41.45	0.000148791
28.95	41.5	0.000235071
28.95	41.55	0.000274335
28.95	41.6	0.000235243
28.95	41.65	0.000148307
28.95	41.7	6.86357e-05
28.95	41.75	2.33341e-05
28.95	41.8	5.82401e-06
28.95	41.85	1.07001e-06
28.95	41.9	1.75049e-07
28.95	41.95	3.31244e-07
28.95	42	2.35935e-06
28.95	42.05	1.2883e-05
28.95	42.1	5.16844e-05
28.95	42.15	0.000152286
28.95	42.2	0.000329514
28.95	42.25	0.00052359
29	39.7	0.000775958
29	39.75	0.000994423
29	39.8	0.00104061
29	39.85	0.000948931
29	39.9	0.000843936
29	39.95	0.000830617
29	40	0.000988196
29	40.05	0.00143464
29	40.1	0.00224
29	40.15	0.00321211
29	40.2	0.00396281
29	40.25	0.00435373
29	40.3	0.004736
29	40.35	0.00541579
29	40.4	0.00611287
29	40.45	0.00635157
29	40.5	0.0061959
29	40.55	0.00605406
29	40.6	0.00589492
29	40.65	0.00525319
29	40.7	0.00403546
29	40.75	0.00274162
29	40.8	0.00191135
[truncated: 1,537 more rows]
