# Supplementary material for: Planar seismic source characterization models developed for probabilistic seismic hazard assessment of Istanbul
Source: Copernicus journal article supplement (doi:10.5194/nhess-17-2365-2017), 2017-12-22
Supplement: Supplementary file 1 [file nhess-17-2365-2017-supplement.zip › Supplement 3.xlsx]

## Sheet: CNEAM_580_part1
	The logic tree branches associated with these rates are coded as follows:
	Slip rate=1, Lower bound in Table 1,			Slip rate=2, Median in Table 1,			Slip rate=3, Upper bound in Table 1,
	B-value=1, Weichert (1980) - Zone specific				B-value=2, ZMAP-zone-specific			B-value=3, Regional value - Table 2
	Mmax=1, Mmax1 in Table 6, Mmax=2, Mmax2 in Table 6, Mmax=3, Mmax3 in Table 6
	Codes for Each Column
Slip rate	1	1	1	1	1	1	1	1	1	2	2	2	2	2	2	2	2	2	3	3	3	3	3	3	3	3	3
B-value	1	1	1	2	2	2	3	3	3	1	1	1	2	2	2	3	3	3	1	1	1	2	2	2	3	3	3
Mmax	1	2	3	1	2	3	1	2	3	1	2	3	1	2	3	1	2	3	1	2	3	1	2	3	1	2	3
North_Cinarcik		Weights /Earthquake Rates
Magnitude	0.0375	0.075	0.0375	0.0375	0.075	0.0375	0.05	0.1	0.05	0.01875	0.0375	0.01875	0.01875	0.0375	0.01875	0.025	0.05	0.025	0.01875	0.0375	0.01875	0.01875	0.0375	0.01875	0.025	0.05	0.025
4.05	0.07329	0.05598	0.04276	0.06445	0.04855	0.03658	0.08332	0.06453	0.04997	0.0793	0.06057	0.04627	0.06973	0.05253	0.03958	0.09015	0.06982	0.05407	0.06728	0.05139	0.03926	0.05917	0.04457	0.03358	0.07649	0.05924	0.04588
4.15	0.06209	0.04743	0.03623	0.05511	0.04152	0.03128	0.06994	0.05417	0.04195	0.06718	0.05132	0.0392	0.05963	0.04492	0.03384	0.07568	0.05861	0.04539	0.057	0.04354	0.03326	0.05059	0.03811	0.02871	0.06421	0.04973	0.03851
4.25	0.05261	0.04018	0.03069	0.04712	0.0355	0.02674	0.05871	0.04547	0.03522	0.05692	0.04348	0.03321	0.05099	0.03841	0.02894	0.06353	0.0492	0.0381	0.0483	0.03689	0.02818	0.04326	0.03259	0.02455	0.0539	0.04174	0.03233
4.35	0.04457	0.03404	0.026	0.04029	0.03035	0.02287	0.04929	0.03817	0.02956	0.04822	0.03684	0.02814	0.0436	0.03284	0.02474	0.05333	0.0413	0.03199	0.04092	0.03125	0.02387	0.03699	0.02787	0.02099	0.04525	0.03504	0.02714
4.45	0.03776	0.02884	0.02203	0.03445	0.02596	0.01955	0.04138	0.03204	0.02482	0.04086	0.03121	0.02384	0.03728	0.02808	0.02116	0.04477	0.03467	0.02685	0.03467	0.02648	0.02023	0.03163	0.02383	0.01795	0.03798	0.02942	0.02278
4.55	0.03199	0.02444	0.01867	0.02946	0.02219	0.01672	0.03473	0.0269	0.02083	0.03462	0.02644	0.0202	0.03187	0.02401	0.01809	0.03758	0.0291	0.02254	0.02937	0.02243	0.01714	0.02705	0.02037	0.01535	0.03189	0.02469	0.01913
4.65	0.02711	0.0207	0.01581	0.02519	0.01898	0.0143	0.02916	0.02258	0.01749	0.02933	0.0224	0.01711	0.02725	0.02053	0.01547	0.03155	0.02443	0.01892	0.02488	0.01901	0.01452	0.02313	0.01742	0.01312	0.02677	0.02073	0.01605
4.75	0.02296	0.01754	0.0134	0.02154	0.01623	0.01222	0.02448	0.01896	0.01468	0.02485	0.01898	0.0145	0.0233	0.01756	0.01323	0.02648	0.02051	0.01588	0.02108	0.0161	0.0123	0.01977	0.0149	0.01122	0.02247	0.0174	0.01348
4.85	0.01946	0.01486	0.01135	0.01842	0.01387	0.01045	0.02055	0.01591	0.01232	0.02105	0.01608	0.01228	0.01993	0.01501	0.01131	0.02223	0.01722	0.01333	0.01786	0.01364	0.01042	0.01691	0.01274	0.009596	0.01886	0.01461	0.01131
4.95	0.01648	0.01259	0.009617	0.01575	0.01186	0.008938	0.01725	0.01336	0.01035	0.01783	0.01362	0.01041	0.01704	0.01284	0.00967	0.01866	0.01445	0.01119	0.01513	0.01156	0.008829	0.01446	0.01089	0.008205	0.01583	0.01226	0.009497
5.05	0.01397	0.01067	0.008148	0.01347	0.01014	0.007642	0.01448	0.01121	0.008684	0.01511	0.01154	0.008816	0.01457	0.01098	0.008269	0.01567	0.01213	0.009396	0.01282	0.009793	0.00748	0.01236	0.009313	0.007016	0.01329	0.01029	0.007973
5.15	0.01183	0.009038	0.006903	0.01151	0.008674	0.006535	0.01215	0.009413	0.00729	0.0128	0.009778	0.007469	0.01246	0.009385	0.00707	0.01315	0.01018	0.007888	0.01086	0.008297	0.006337	0.01057	0.007963	0.005999	0.01116	0.008642	0.006693
5.25	0.01002	0.007657	0.005849	0.009845	0.007417	0.005588	0.0102	0.007902	0.00612	0.01085	0.008284	0.006328	0.01065	0.008025	0.006046	0.01104	0.00855	0.006622	0.009203	0.007029	0.005369	0.009038	0.006809	0.00513	0.009367	0.007254	0.005618
5.35	0.008493	0.006487	0.004955	0.008418	0.006342	0.004778	0.008565	0.006634	0.005137	0.009189	0.007019	0.005361	0.009108	0.006862	0.005169	0.009267	0.007177	0.005559	0.007797	0.005955	0.004549	0.007728	0.005822	0.004386	0.007863	0.00609	0.004716
5.45	0.007195	0.005496	0.004198	0.007198	0.005423	0.004085	0.00719	0.005569	0.004313	0.007785	0.005947	0.004542	0.007788	0.005867	0.00442	0.00778	0.006025	0.004666	0.006606	0.005046	0.003854	0.006608	0.004978	0.00375	0.006601	0.005112	0.003959
5.55	0.006096	0.004656	0.003557	0.006155	0.004637	0.003493	0.006036	0.004675	0.00362	0.006596	0.005038	0.003848	0.00666	0.005017	0.00378	0.006531	0.005058	0.003917	0.005596	0.004275	0.003265	0.005651	0.004257	0.003207	0.005541	0.004291	0.003324
5.65	0.005165	0.003945	0.003013	0.005263	0.003965	0.002987	0.005067	0.003924	0.003039	0.005588	0.004268	0.00326	0.005694	0.00429	0.003232	0.005482	0.004246	0.003288	0.004741	0.003622	0.002766	0.004832	0.00364	0.002742	0.004652	0.003602	0.00279
5.75	0.004376	0.003342	0.002553	0.0045	0.00339	0.002554	0.004253	0.003294	0.002551	0.004734	0.003616	0.002762	0.004869	0.003668	0.002763	0.004602	0.003564	0.00276	0.004017	0.003068	0.002344	0.004131	0.003112	0.002345	0.003905	0.003024	0.002342
5.85	0.003707	0.002832	0.002163	0.003848	0.002899	0.002184	0.003571	0.002765	0.002142	0.004011	0.003064	0.00234	0.004163	0.003136	0.002363	0.003863	0.002992	0.002317	0.003403	0.0026	0.001986	0.003533	0.002661	0.002005	0.003278	0.002539	0.001966
5.95	0.003141	0.002399	0.001833	0.00329	0.002479	0.001867	0.002997	0.002321	0.001798	0.003398	0.002596	0.001983	0.00356	0.002682	0.00202	0.003243	0.002512	0.001945	0.002883	0.002202	0.001682	0.003021	0.002276	0.001714	0.002752	0.002131	0.00165
6.05	0.002661	0.002033	0.001553	0.002813	0.002119	0.001597	0.002516	0.001949	0.001509	0.002879	0.002199	0.00168	0.003044	0.002293	0.001728	0.002722	0.002108	0.001633	0.002443	0.001866	0.001425	0.002583	0.001946	0.001466	0.00231	0.001789	0.001385
6.15	0.002255	0.001722	0.001315	0.002406	0.001812	0.001365	0.002112	0.001636	0.001267	0.002439	0.001863	0.001423	0.002603	0.001961	0.001477	0.002285	0.00177	0.001371	0.00207	0.001581	0.001208	0.002208	0.001664	0.001253	0.001939	0.001502	0.001163
6.25	0.00191	0.001459	0.001114	0.002057	0.00155	0.001167	0.001773	0.001373	0.001064	0.002067	0.001579	0.001206	0.002226	0.001677	0.001263	0.001918	0.001486	0.001151	0.001754	0.001339	0.001023	0.001888	0.001423	0.001072	0.001628	0.001261	0.0009763
6.35	0.001618	0.001236	0.0009442	0.001759	0.001325	0.0009982	0.001488	0.001153	0.0008928	0.001751	0.001337	0.001022	0.001903	0.001434	0.00108	0.00161	0.001247	0.000966	0.001486	0.001135	0.0008668	0.001615	0.001216	0.0009164	0.001366	0.001058	0.0008196
6.45	0.007059	0.001047	0.0007999	0.007051	0.001133	0.0008535	0.007067	0.0009677	0.0007495	0.007638	0.001133	0.0008655	0.007629	0.001226	0.0009235	0.007646	0.001047	0.0008109	0.006481	0.0009614	0.0007344	0.006473	0.00104	0.0007836	0.006487	0.0008884	0.000688
6.55	0.00768	0.00238	0.0006777	0.007656	0.002423	0.0007298	0.007702	0.002339	0.0006291	0.008309	0.002575	0.0007333	0.008283	0.002622	0.0007897	0.008333	0.002531	0.0006807	0.00705	0.002185	0.0006222	0.007028	0.002225	0.00067	0.00707	0.002148	0.0005776
6.65	0.00768	0.004575	0.0005742	0.007656	0.00456	0.0006241	0.007702	0.004588	0.0005281	0.008309	0.00495	0.0006212	0.008283	0.004934	0.0006752	0.008333	0.004964	0.0005714	0.00705	0.0042	0.0005271	0.007028	0.004186	0.0005729	0.00707	0.004212	0.0004848
6.75	0.00768	0.004575	0.002505	0.007656	0.00456	0.002502	0.007702	0.004588	0.002507	0.008309	0.00495	0.00271	0.008283	0.004934	0.002707	0.008333	0.004964	0.002713	0.00705	0.0042	0.002299	0.007028	0.004186	0.002297	0.00707	0.004212	0.002302
6.85	0.00768	0.004575	0.002725	0.007656	0.00456	0.002716	0.007702	0.004588	0.002733	0.008309	0.00495	0.002948	0.008283	0.004934	0.002939	0.008333	0.004964	0.002957	0.00705	0.0042	0.002502	0.007028	0.004186	0.002494	0.00707	0.004212	0.002509
6.95	0.000768	0.004575	0.002725	0.0007656	0.00456	0.002716	0.0007702	0.004588	0.002733	0.000831	0.00495	0.002948	0.0008283	0.004934	0.002939	0.0008333	0.004964	0.002957	0.0007051	0.0042	0.002502	0.0007028	0.004186	0.002494	0.0007071	0.004212	0.002509
7.05	0	0.002745	0.002725	0	0.002736	0.002716	0	0.002753	0.002733	0	0.00297	0.002948	0	0.00296	0.002939	0	0.002978	0.002957	0	0.00252	0.002502	0	0.002512	0.002494	0	0.002527	0.002509
7.15	0	0	0.002725	0	0	0.002716	0	0	0.002733	0	0	0.002948	0	0	0.002939	0	0	0.002957	0	0	0.002502	0	0	0.002494	0	0	0.002509
7.25	0	0	0.0002725	0	0	0.0002716	0	0	0.0002733	0	0	0.0002948	0	0	0.0002939	0	0	0.0002957	0	0	0.0002502	0	0	0.0002494	0	0	0.0002509
Hersek-Golcuk	Weights /Earthquake Rates
Magnitude	0.0375	0.075	0.0375	0.0375	0.075	0.0375	0.05	0.1	0.05	0.01875	0.0375	0.01875	0.01875	0.0375	0.01875	0.025	0.05	0.025	0.01875	0.0375	0.01875	0.01875	0.0375	0.01875	0.025	0.05	0.025
4.05	0.05271	0.04026	0.03076	0.04551	0.03428	0.02583	0.06104	0.04727	0.03661	0.04716	0.03603	0.02752	0.04072	0.03068	0.02311	0.05461	0.0423	0.03276	0.05826	0.0445	0.03399	0.0503	0.03789	0.02855	0.06747	0.05225	0.04047
4.15	0.04466	0.03411	0.02606	0.03891	0.02932	0.02209	0.05124	0.03968	0.03073	0.03996	0.03052	0.02331	0.03482	0.02623	0.01976	0.04585	0.03551	0.0275	0.04936	0.0377	0.0288	0.04301	0.0324	0.02441	0.05663	0.04386	0.03397
4.25	0.03784	0.0289	0.02208	0.03327	0.02507	0.01888	0.04301	0.03331	0.0258	0.03385	0.02586	0.01975	0.02977	0.02243	0.0169	0.03849	0.02981	0.02308	0.04182	0.03194	0.0244	0.03678	0.02771	0.02087	0.04754	0.03682	0.02852
4.35	0.03206	0.02449	0.0187	0.02845	0.02143	0.01615	0.03611	0.02797	0.02166	0.02868	0.02191	0.01673	0.02546	0.01918	0.01445	0.03231	0.02502	0.01938	0.03543	0.02706	0.02067	0.03145	0.02369	0.01785	0.03991	0.03091	0.02394
4.45	0.02716	0.02075	0.01585	0.02433	0.01833	0.01381	0.03031	0.02348	0.01818	0.0243	0.01856	0.01418	0.02177	0.0164	0.01235	0.02712	0.021	0.01627	0.03002	0.02293	0.01751	0.02689	0.02026	0.01526	0.0335	0.02595	0.02009
4.55	0.02301	0.01758	0.01343	0.0208	0.01567	0.01181	0.02545	0.01971	0.01526	0.02059	0.01573	0.01201	0.01861	0.01402	0.01056	0.02277	0.01763	0.01366	0.02543	0.01943	0.01484	0.02299	0.01732	0.01305	0.02812	0.02178	0.01687
4.65	0.01949	0.01489	0.01137	0.01779	0.0134	0.01009	0.02136	0.01654	0.01281	0.01744	0.01332	0.01018	0.01591	0.01199	0.009032	0.01911	0.0148	0.01146	0.02155	0.01646	0.01257	0.01966	0.01481	0.01116	0.02361	0.01828	0.01416
4.75	0.01652	0.01262	0.009637	0.01521	0.01146	0.008632	0.01793	0.01389	0.01076	0.01478	0.01129	0.008622	0.01361	0.01025	0.007723	0.01604	0.01243	0.009623	0.01826	0.01394	0.01065	0.01681	0.01266	0.00954	0.01982	0.01535	0.01189
4.85	0.01399	0.01069	0.008164	0.013	0.009797	0.007381	0.01505	0.01166	0.009029	0.01252	0.009564	0.007305	0.01164	0.008766	0.006604	0.01347	0.01043	0.008078	0.01547	0.01181	0.009024	0.01437	0.01083	0.008158	0.01664	0.01288	0.009979
4.95	0.01186	0.009056	0.006917	0.01112	0.008377	0.006311	0.01264	0.009786	0.007579	0.01061	0.008102	0.006189	0.009949	0.007495	0.005647	0.01131	0.008756	0.006781	0.0131	0.01001	0.007645	0.01229	0.009259	0.006975	0.01397	0.01082	0.008377
5.05	0.01004	0.007672	0.00586	0.009508	0.007163	0.005396	0.01061	0.008215	0.006362	0.008987	0.006865	0.005243	0.008507	0.006409	0.004828	0.009491	0.00735	0.005693	0.0111	0.00848	0.006477	0.01051	0.007917	0.005964	0.01172	0.00908	0.007032
5.15	0.00851	0.0065	0.004965	0.00813	0.006125	0.004614	0.008905	0.006896	0.005341	0.007614	0.005816	0.004442	0.007274	0.00548	0.004129	0.007967	0.00617	0.004779	0.009406	0.007184	0.005488	0.008986	0.00677	0.0051	0.009842	0.007622	0.005903
5.25	0.00721	0.005507	0.004207	0.006952	0.005237	0.003945	0.007475	0.005789	0.004483	0.006451	0.004927	0.003764	0.00622	0.004686	0.00353	0.006688	0.00518	0.004012	0.007969	0.006087	0.004649	0.007684	0.005788	0.004361	0.008262	0.006399	0.004955
5.35	0.006108	0.004666	0.003564	0.005944	0.004478	0.003374	0.006275	0.00486	0.003764	0.005465	0.004175	0.003189	0.005319	0.004007	0.003019	0.005614	0.004348	0.003368	0.006751	0.005157	0.003939	0.00657	0.00495	0.003729	0.006936	0.005371	0.00416
5.45	0.005175	0.003953	0.003019	0.005083	0.003829	0.002885	0.005268	0.00408	0.003159	0.00463	0.003537	0.002702	0.004548	0.003426	0.002581	0.004713	0.00365	0.002827	0.00572	0.004369	0.003337	0.005618	0.004232	0.003188	0.005822	0.004509	0.003492
5.55	0.004385	0.003349	0.002558	0.004346	0.003274	0.002467	0.004422	0.003425	0.002652	0.003923	0.002997	0.002289	0.003889	0.00293	0.002207	0.003956	0.003064	0.002373	0.004846	0.003702	0.002827	0.004804	0.003619	0.002726	0.004887	0.003785	0.002931
5.65	0.003715	0.002837	0.002167	0.003716	0.0028	0.002109	0.003712	0.002875	0.002226	0.003324	0.002539	0.001939	0.003325	0.002505	0.001887	0.003321	0.002572	0.001992	0.004106	0.003136	0.002395	0.004107	0.003094	0.002331	0.004103	0.003177	0.002461
5.75	0.003147	0.002404	0.001836	0.003178	0.002394	0.001803	0.003116	0.002413	0.001869	0.002816	0.002151	0.001643	0.002843	0.002142	0.001614	0.002788	0.002159	0.001672	0.003478	0.002657	0.002029	0.003512	0.002646	0.001993	0.003444	0.002667	0.002066
5.85	0.002666	0.002037	0.001556	0.002717	0.002047	0.001542	0.002616	0.002026	0.001569	0.002386	0.001822	0.001392	0.002431	0.001831	0.00138	0.002341	0.001813	0.001404	0.002947	0.002251	0.001719	0.003003	0.002262	0.001704	0.002891	0.002239	0.001734
5.95	0.002259	0.001726	0.001318	0.002323	0.00175	0.001319	0.002196	0.001701	0.001317	0.002021	0.001544	0.001179	0.002079	0.001566	0.00118	0.001965	0.001522	0.001178	0.002497	0.001907	0.001457	0.002568	0.001934	0.001457	0.002427	0.00188	0.001456
6.05	0.001914	0.001462	0.001117	0.001987	0.001497	0.001127	0.001843	0.001428	0.001106	0.001712	0.001308	0.0009991	0.001777	0.001339	0.001009	0.001649	0.001277	0.0009893	0.002115	0.001616	0.001234	0.002196	0.001654	0.001246	0.002037	0.001578	0.001222
6.15	0.001622	0.001239	0.0009461	0.001699	0.00128	0.0009641	0.001547	0.001198	0.0009281	0.001451	0.001108	0.0008465	0.00152	0.001145	0.0008626	0.001385	0.001072	0.0008304	0.001792	0.001369	0.001046	0.001877	0.001414	0.001066	0.00171	0.001325	0.001026
6.25	0.001374	0.001049	0.0008015	0.001452	0.001094	0.0008243	0.001299	0.001006	0.0007791	0.001229	0.0009389	0.0007172	0.0013	0.000979	0.0007376	0.001162	0.0009001	0.0006971	0.001518	0.00116	0.0008859	0.001605	0.001209	0.0009111	0.001436	0.001112	0.0008612
6.35	0.001164	0.000889	0.0006791	0.001242	0.0009356	0.0007049	0.00109	0.0008445	0.0006541	0.001041	0.0007955	0.0006076	0.001111	0.0008371	0.0006307	0.0009757	0.0007556	0.0005852	0.001286	0.0009826	0.0007506	0.001373	0.001034	0.0007791	0.001205	0.0009334	0.0007229
6.45	0.0009861	0.0007532	0.0005753	0.001062	0.0008	0.0006027	0.0009154	0.0007089	0.0005491	0.0008823	0.0006739	0.0005148	0.0009502	0.0007158	0.0005393	0.0008191	0.0006343	0.0004913	0.00109	0.0008325	0.0006359	0.001174	0.0008842	0.0006661	0.001012	0.0007836	0.0006069
6.55	0.0008355	0.0006381	0.0004874	0.000908	0.0006841	0.0005153	0.0007684	0.0005951	0.0004609	0.0007475	0.000571	0.0004361	0.0008124	0.0006121	0.0004611	0.0006876	0.0005325	0.0004124	0.0009234	0.0007053	0.0005388	0.001004	0.0007561	0.0005696	0.0008493	0.0006578	0.0005094
6.65	0.003645	0.0005407	0.000413	0.00364	0.0005849	0.0004407	0.003648	0.0004996	0.0003869	0.003261	0.0004837	0.0003695	0.003257	0.0005234	0.0003943	0.003264	0.000447	0.0003462	0.004028	0.0005976	0.0004564	0.004024	0.0006465	0.000487	0.004032	0.0005522	0.0004276
6.75	0.003965	0.001229	0.0003499	0.003952	0.001251	0.0003768	0.003976	0.001208	0.0003248	0.003547	0.001099	0.0003131	0.003536	0.001119	0.0003371	0.003558	0.001081	0.0002906	0.004382	0.001358	0.0003867	0.004368	0.001383	0.0004165	0.004395	0.001335	0.000359
6.85	0.003965	0.002362	0.0002964	0.003952	0.002354	0.0003222	0.003976	0.002368	0.0002727	0.003547	0.002113	0.0002652	0.003536	0.002106	0.0002883	0.003558	0.002119	0.000244	0.004382	0.00261	0.0003276	0.004368	0.002602	0.0003561	0.004395	0.002618	0.0003014
6.95	0.003965	0.002362	0.001293	0.003952	0.002354	0.001292	0.003976	0.002368	0.001294	0.003547	0.002113	0.001157	0.003536	0.002106	0.001156	0.003558	0.002119	0.001158	0.004382	0.00261	0.001429	0.004368	0.002602	0.001428	0.004395	0.002618	0.001431
7.05	0.003965	0.002362	0.001407	0.003952	0.002354	0.001402	0.003976	0.002368	0.001411	0.003547	0.002113	0.001259	0.003536	0.002106	0.001255	0.003558	0.002119	0.001262	0.004382	0.00261	0.001555	0.004368	0.002602	0.00155	0.004395	0.002618	0.001559
7.15	0.0003965	0.002362	0.001407	0.0003952	0.002354	0.001402	0.0003976	0.002368	0.001411	0.0003548	0.002113	0.001259	0.0003536	0.002106	0.001255	0.0003558	0.002119	0.001262	0.0004382	0.00261	0.001555	0.0004368	0.002602	0.00155	0.0004395	0.002618	0.001559
7.25	0	0.001417	0.001407	0	0.001413	0.001402	0	0.001421	0.001411	0	0.001268	0.001259	0	0.001264	0.001255	0	0.001271	0.001262	0	0.001566	0.001555	0	0.001561	0.00155	0	0.001571	0.001559
7.35	0	0	0.001407	0	0	0.001402	0	0	0.001411	0	0	0.001259	0	0	0.001255	0	0	0.001262	0	0	0.001555	0	0	0.00155	0	0	0.001559
7.45	0	0	0.0001407	0	0	0.0001402	0	0	0.0001411	0	0	0.0001259	0	0	0.0001255	0	0	0.0001262	0	0	0.0001555	0	0	0.000155	0	0	0.0001559
Izmit	Weights /Earthquake Rates
Magnitude	0.0375	0.075	0.0375	0.0375	0.075	0.0375	0.05	0.1	0.05	0.01875	0.0375	0.01875	0.01875	0.0375	0.01875	0.025	0.05	0.025	0.01875	0.0375	0.01875	0.01875	0.0375	0.01875	0.025	0.05	0.025
4.05	0.05007	0.03825	0.02922	0.04432	0.03339	0.02515	0.05656	0.0438	0.03392	0.0448	0.03422	0.02614	0.03965	0.02987	0.02251	0.05061	0.03919	0.03035	0.05534	0.04227	0.03229	0.04898	0.0369	0.0278	0.06251	0.04841	0.03749
4.15	0.04242	0.0324	0.02475	0.0379	0.02855	0.02151	0.04748	0.03677	0.02848	0.03796	0.02899	0.02215	0.03391	0.02554	0.01924	0.04248	0.0329	0.02548	0.04689	0.03582	0.02736	0.04188	0.03155	0.02377	0.05248	0.04064	0.03147
4.25	0.03594	0.02745	0.02097	0.0324	0.02441	0.01839	0.03986	0.03087	0.02391	0.03216	0.02456	0.01876	0.02899	0.02184	0.01645	0.03566	0.02762	0.02139	0.03973	0.03034	0.02318	0.03581	0.02698	0.02033	0.04405	0.03412	0.02642
4.35	0.03045	0.02326	0.01777	0.02771	0.02087	0.01572	0.03346	0.02591	0.02007	0.02725	0.02081	0.0159	0.02479	0.01868	0.01407	0.02994	0.02318	0.01796	0.03366	0.02571	0.01964	0.03062	0.02307	0.01738	0.03698	0.02864	0.02218
4.45	0.0258	0.01971	0.01505	0.02369	0.01785	0.01345	0.02809	0.02175	0.01685	0.02308	0.01763	0.01347	0.0212	0.01597	0.01203	0.02513	0.01946	0.01507	0.02851	0.02178	0.01664	0.02618	0.01973	0.01486	0.03104	0.02404	0.01862
4.55	0.02186	0.0167	0.01275	0.02026	0.01526	0.0115	0.02358	0.01826	0.01414	0.01956	0.01494	0.01141	0.01813	0.01365	0.01029	0.0211	0.01634	0.01265	0.02416	0.01845	0.0141	0.02239	0.01687	0.01271	0.02606	0.02018	0.01563
4.65	0.01852	0.01415	0.0108	0.01732	0.01305	0.009831	0.01979	0.01533	0.01187	0.01657	0.01266	0.009667	0.0155	0.01168	0.008796	0.01771	0.01371	0.01062	0.02047	0.01563	0.01194	0.01914	0.01442	0.01087	0.02188	0.01694	0.01312
4.75	0.01569	0.01198	0.009154	0.01481	0.01116	0.008406	0.01661	0.01287	0.009966	0.01404	0.01072	0.00819	0.01325	0.009983	0.007521	0.01487	0.01151	0.008917	0.01734	0.01325	0.01012	0.01637	0.01233	0.009291	0.01836	0.01422	0.01101
4.85	0.01329	0.01015	0.007755	0.01266	0.009541	0.007188	0.01395	0.0108	0.008366	0.01189	0.009085	0.006939	0.01133	0.008536	0.006431	0.01248	0.009665	0.007485	0.01469	0.01122	0.008572	0.014	0.01055	0.007944	0.01542	0.01194	0.009246
4.95	0.01126	0.008602	0.006571	0.01083	0.008158	0.006146	0.01171	0.009068	0.007023	0.01008	0.007697	0.005879	0.009689	0.007299	0.005499	0.01048	0.008113	0.006283	0.01245	0.009508	0.007262	0.01197	0.009017	0.006793	0.01294	0.01002	0.007762
5.05	0.009541	0.007288	0.005567	0.009259	0.006976	0.005255	0.009829	0.007612	0.005895	0.008537	0.006521	0.004981	0.008285	0.006241	0.004702	0.008794	0.006811	0.005275	0.01055	0.008055	0.006153	0.01023	0.00771	0.005808	0.01086	0.008413	0.006516
5.15	0.008084	0.006175	0.004716	0.007917	0.005965	0.004493	0.008251	0.00639	0.004949	0.007233	0.005525	0.00422	0.007084	0.005337	0.00402	0.007382	0.005717	0.004428	0.008935	0.006825	0.005213	0.008751	0.006592	0.004966	0.009119	0.007063	0.00547
5.25	0.006849	0.005231	0.003996	0.00677	0.0051	0.003842	0.006926	0.005364	0.004154	0.006128	0.004681	0.003575	0.006057	0.004563	0.003438	0.006197	0.004799	0.003717	0.00757	0.005782	0.004416	0.007483	0.005637	0.004247	0.007655	0.005929	0.004592
5.35	0.005802	0.004432	0.003385	0.005789	0.004361	0.003285	0.005814	0.004503	0.003487	0.005192	0.003966	0.003029	0.005179	0.003902	0.00294	0.005202	0.004029	0.00312	0.006413	0.004899	0.003742	0.006398	0.00482	0.003631	0.006426	0.004977	0.003854
5.45	0.004916	0.003755	0.002868	0.00495	0.003729	0.002809	0.004881	0.00378	0.002928	0.004398	0.00336	0.002566	0.004429	0.003336	0.002514	0.004367	0.003382	0.002619	0.005433	0.00415	0.00317	0.005471	0.004121	0.003105	0.005395	0.004178	0.003236
5.55	0.004165	0.003181	0.00243	0.004232	0.003188	0.002402	0.004097	0.003173	0.002458	0.003727	0.002846	0.002174	0.003787	0.002853	0.002149	0.003666	0.002839	0.002199	0.004603	0.003516	0.002686	0.004678	0.003524	0.002655	0.004529	0.003507	0.002716
5.65	0.003529	0.002695	0.002059	0.003619	0.002726	0.002054	0.00344	0.002664	0.002063	0.003157	0.002412	0.001842	0.003238	0.002439	0.001838	0.003077	0.002383	0.001846	0.0039	0.002979	0.002275	0.004	0.003013	0.00227	0.003802	0.002944	0.00228
5.75	0.00299	0.002284	0.001744	0.003094	0.002331	0.001756	0.002887	0.002236	0.001732	0.002675	0.002043	0.001561	0.002769	0.002086	0.001571	0.002583	0.002001	0.00155	0.003304	0.002524	0.001928	0.00342	0.002577	0.001941	0.003191	0.002472	0.001914
5.85	0.002533	0.001935	0.001478	0.002646	0.001993	0.001502	0.002424	0.001877	0.001454	0.002266	0.001731	0.001322	0.002367	0.001784	0.001344	0.002169	0.00168	0.001301	0.002799	0.002138	0.001633	0.002924	0.002203	0.00166	0.002679	0.002075	0.001607
5.95	0.002146	0.001639	0.001252	0.002262	0.001704	0.001284	0.002035	0.001576	0.00122	0.00192	0.001467	0.00112	0.002024	0.001525	0.001149	0.001821	0.00141	0.001092	0.002372	0.001812	0.001384	0.002501	0.001884	0.001419	0.002249	0.001742	0.001349
6.05	0.001818	0.001389	0.001061	0.001935	0.001457	0.001098	0.001708	0.001323	0.001024	0.001627	0.001243	0.0009491	0.001731	0.001304	0.0009824	0.001528	0.001184	0.0009166	0.002009	0.001535	0.001172	0.002138	0.001611	0.001214	0.001888	0.001462	0.001132
6.15	0.00154	0.001177	0.0008987	0.001654	0.001246	0.0009388	0.001434	0.00111	0.00086	0.001378	0.001053	0.0008041	0.00148	0.001115	0.00084	0.001283	0.0009936	0.0007695	0.001702	0.0013	0.0009933	0.001828	0.001377	0.001038	0.001585	0.001227	0.0009505
6.25	0.001305	0.0009968	0.0007614	0.001414	0.001066	0.0008028	0.001204	0.0009322	0.0007219	0.001168	0.0008919	0.0006812	0.001266	0.0009534	0.0007183	0.001077	0.0008341	0.0006459	0.001442	0.001102	0.0008415	0.001563	0.001178	0.0008873	0.00133	0.00103	0.0007979
6.35	0.004	0.0008445	0.0006451	0.004031	0.0009111	0.0006864	0.003971	0.0007825	0.000606	0.003579	0.0007556	0.0005772	0.003607	0.0008152	0.0006142	0.003553	0.0007002	0.0005422	0.004421	0.0009334	0.000713	0.004455	0.001007	0.0007587	0.004389	0.0008649	0.0006698
6.45	0.005893	0.001	0.0005465	0.005874	0.001056	0.0005869	0.005909	0.0009483	0.0005087	0.005272	0.0008949	0.000489	0.005256	0.0009452	0.0005251	0.005287	0.0008485	0.0004552	0.006513	0.001105	0.000604	0.006492	0.001168	0.0006487	0.006531	0.001048	0.0005623
6.55	0.005893	0.00351	0.000463	0.005874	0.003499	0.0005019	0.005909	0.00352	0.0004271	0.005272	0.003141	0.0004143	0.005256	0.003131	0.000449	0.005287	0.003149	0.0003821	0.006513	0.003879	0.0005118	0.006492	0.003867	0.0005547	0.006531	0.003891	0.000472
6.65	0.005893	0.00351	0.001419	0.005874	0.003499	0.00143	0.005909	0.00352	0.001409	0.005272	0.003141	0.00127	0.005256	0.003131	0.00128	0.005287	0.003149	0.001261	0.006513	0.003879	0.001569	0.006492	0.003867	0.001581	0.006531	0.003891	0.001557
6.75	0.005893	0.00351	0.002091	0.005874	0.003499	0.002084	0.005909	0.00352	0.002097	0.005272	0.003141	0.001871	0.005256	0.003131	0.001865	0.005287	0.003149	0.001876	0.006513	0.003879	0.002311	0.006492	0.003867	0.002304	0.006531	0.003891	0.002317
6.85	0.002357	0.00351	0.002091	0.00235	0.003499	0.002084	0.002364	0.00352	0.002097	0.002109	0.003141	0.001871	0.002102	0.003131	0.001865	0.002115	0.003149	0.001876	0.002605	0.003879	0.002311	0.002597	0.003867	0.002304	0.002613	0.003891	0.002317
6.95	0	0.003159	0.002091	0	0.003149	0.002084	0	0.003168	0.002097	0	0.002826	0.001871	0	0.002818	0.001865	0	0.002835	0.001876	0	0.003492	0.002311	0	0.003481	0.002304	0	0.003501	0.002317
7.05	0	0	0.002091	0	0	0.002084	0	0	0.002097	0	0	0.001871	0	0	0.001865	0	0	0.001876	0	0	0.002311	0	0	0.002304	0	0	0.002317
7.15	0	0	0.0008363	0	0	0.0008337	0	0	0.0008387	0	0	0.0007483	0	0	0.0007459	0	0	0.0007504	0	0	0.0009243	0	0	0.0009214	0	0	0.000927
Sapanca-Akyazi		Weights /Earthquake Rates
Magnitude	0.0375	0.075	0.0375	0.0375	0.075	0.0375	0.05	0.1	0.05	0.01875	0.0375	0.01875	0.01875	0.0375	0.01875	0.025	0.05	0.025	0.01875	0.0375	0.01875	0.01875	0.0375	0.01875	0.025	0.05	0.025
4.05	0.05137	0.03924	0.02997	0.04492	0.03384	0.0255	0.05872	0.04548	0.03522	0.04596	0.03511	0.02681	0.04019	0.03028	0.02281	0.05254	0.04069	0.03151	0.05677	0.04337	0.03312	0.04965	0.0374	0.02818	0.0649	0.05026	0.03893
4.15	0.04352	0.03324	0.02539	0.03841	0.02894	0.0218	0.04929	0.03817	0.02956	0.03894	0.02974	0.02272	0.03437	0.02589	0.01951	0.0441	0.03416	0.02645	0.0481	0.03674	0.02806	0.04245	0.03198	0.02409	0.05448	0.04219	0.03268
4.25	0.03687	0.02816	0.02151	0.03284	0.02474	0.01864	0.04138	0.03205	0.02482	0.03299	0.0252	0.01925	0.02939	0.02214	0.01668	0.03702	0.02867	0.02221	0.04075	0.03113	0.02378	0.0363	0.02735	0.0206	0.04573	0.03542	0.02743
4.35	0.03124	0.02386	0.01823	0.02808	0.02116	0.01594	0.03474	0.0269	0.02083	0.02795	0.02135	0.01631	0.02513	0.01893	0.01426	0.03108	0.02407	0.01864	0.03453	0.02637	0.02014	0.03104	0.02338	0.01762	0.03839	0.02973	0.02303
4.45	0.02647	0.02022	0.01544	0.02401	0.01809	0.01363	0.02916	0.02258	0.01749	0.02368	0.01809	0.01382	0.02149	0.01619	0.01219	0.02609	0.02021	0.01565	0.02925	0.02234	0.01707	0.02654	0.02	0.01506	0.03223	0.02496	0.01933
4.55	0.02242	0.01713	0.01308	0.02053	0.01547	0.01165	0.02448	0.01896	0.01468	0.02006	0.01532	0.01171	0.01837	0.01384	0.01043	0.0219	0.01696	0.01314	0.02478	0.01893	0.01446	0.02269	0.0171	0.01288	0.02705	0.02095	0.01623
4.65	0.019	0.01451	0.01108	0.01756	0.01323	0.009965	0.02055	0.01591	0.01232	0.017	0.01298	0.009917	0.01571	0.01183	0.008916	0.01839	0.01424	0.01103	0.021	0.01604	0.01225	0.01941	0.01462	0.01101	0.02271	0.01759	0.01362
4.75	0.01609	0.01229	0.00939	0.01501	0.01131	0.00852	0.01725	0.01336	0.01035	0.0144	0.011	0.008402	0.01343	0.01012	0.007623	0.01543	0.01195	0.009257	0.01779	0.01359	0.01038	0.01659	0.0125	0.009417	0.01907	0.01477	0.01144
4.85	0.01364	0.01042	0.007956	0.01284	0.009671	0.007285	0.01448	0.01121	0.008685	0.0122	0.009319	0.007118	0.01149	0.008653	0.006519	0.01296	0.01003	0.007771	0.01507	0.01151	0.008793	0.01419	0.01069	0.008052	0.016	0.01239	0.009599
4.95	0.01155	0.008824	0.00674	0.01098	0.008269	0.00623	0.01216	0.009414	0.007291	0.01034	0.007895	0.006031	0.009821	0.007399	0.005574	0.01088	0.008423	0.006523	0.01277	0.009753	0.00745	0.01213	0.00914	0.006885	0.01344	0.0104	0.008058
5.05	0.009788	0.007476	0.005711	0.009386	0.007071	0.005327	0.0102	0.007903	0.00612	0.008757	0.006689	0.005109	0.008398	0.006326	0.004766	0.00913	0.007071	0.005476	0.01082	0.008263	0.006312	0.01037	0.007815	0.005887	0.01128	0.008735	0.006765
5.15	0.008292	0.006334	0.004838	0.008025	0.006046	0.004555	0.008566	0.006634	0.005138	0.00742	0.005667	0.004329	0.00718	0.005409	0.004075	0.007664	0.005936	0.004597	0.009165	0.007001	0.005347	0.00887	0.006682	0.005034	0.009468	0.007332	0.005679
5.25	0.007026	0.005366	0.004099	0.006862	0.00517	0.003895	0.007191	0.005569	0.004313	0.006286	0.004801	0.003668	0.00614	0.004625	0.003485	0.006434	0.004983	0.003859	0.007765	0.005931	0.004531	0.007584	0.005714	0.004305	0.007948	0.006155	0.004767
5.35	0.005952	0.004547	0.003473	0.005868	0.00442	0.00333	0.006036	0.004675	0.003621	0.005326	0.004068	0.003107	0.00525	0.003955	0.00298	0.005401	0.004183	0.003239	0.006579	0.005025	0.003838	0.006485	0.004886	0.003681	0.006672	0.005167	0.004002
5.45	0.005043	0.003852	0.002942	0.005017	0.00378	0.002847	0.005067	0.003924	0.003039	0.004512	0.003446	0.002633	0.004489	0.003382	0.002548	0.004534	0.003511	0.002719	0.005574	0.004257	0.003252	0.005545	0.004178	0.003147	0.005601	0.004337	0.003359
5.55	0.004272	0.003263	0.002493	0.00429	0.003232	0.002435	0.004254	0.003294	0.002551	0.003823	0.00292	0.00223	0.003838	0.002892	0.002178	0.003806	0.002948	0.002283	0.004722	0.003607	0.002755	0.004742	0.003572	0.002691	0.004702	0.003641	0.00282
5.65	0.00362	0.002765	0.002112	0.003668	0.002763	0.002082	0.003571	0.002765	0.002142	0.003239	0.002474	0.00189	0.003282	0.002473	0.001863	0.003195	0.002474	0.001916	0.004001	0.003056	0.002334	0.004054	0.003054	0.002301	0.003947	0.003057	0.002367
5.75	0.003067	0.002343	0.001789	0.003137	0.002363	0.00178	0.002998	0.002322	0.001798	0.002744	0.002096	0.001601	0.002806	0.002114	0.001593	0.002682	0.002077	0.001609	0.00339	0.002589	0.001978	0.003467	0.002612	0.001968	0.003313	0.002566	0.001987
5.85	0.002598	0.001985	0.001516	0.002682	0.00202	0.001522	0.002516	0.001949	0.001509	0.002325	0.001776	0.001356	0.0024	0.001808	0.001362	0.002251	0.001744	0.00135	0.002872	0.002194	0.001676	0.002964	0.002233	0.001682	0.002781	0.002154	0.001668
5.95	0.002201	0.001681	0.001284	0.002293	0.001728	0.001302	0.002112	0.001636	0.001267	0.00197	0.001504	0.001149	0.002052	0.001546	0.001165	0.00189	0.001464	0.001134	0.002433	0.001858	0.00142	0.002535	0.00191	0.001439	0.002335	0.001808	0.0014
6.05	0.001865	0.001425	0.001088	0.001961	0.001477	0.001113	0.001773	0.001373	0.001064	0.001669	0.001275	0.0009736	0.001755	0.001322	0.0009958	0.001587	0.001229	0.0009516	0.002061	0.001575	0.001203	0.002167	0.001633	0.00123	0.00196	0.001518	0.001176
6.15	0.00158	0.001207	0.0009219	0.001677	0.001263	0.0009516	0.001489	0.001153	0.0008928	0.001414	0.00108	0.0008249	0.0015	0.00113	0.0008514	0.001332	0.001031	0.0007989	0.001746	0.001334	0.001019	0.001853	0.001396	0.001052	0.001645	0.001274	0.0009868
6.25	0.001339	0.001023	0.0007811	0.001434	0.00108	0.0008137	0.00125	0.0009678	0.0007495	0.001198	0.0009149	0.0006988	0.001283	0.0009664	0.000728	0.001118	0.0008659	0.0006706	0.00148	0.00113	0.0008633	0.001585	0.001194	0.0008993	0.001381	0.00107	0.0008284
6.35	0.001134	0.0008663	0.0006617	0.001226	0.0009235	0.0006958	0.001049	0.0008124	0.0006292	0.001015	0.0007751	0.0005921	0.001097	0.0008263	0.0006225	0.0009386	0.0007269	0.0005629	0.001254	0.0009575	0.0007314	0.001355	0.001021	0.000769	0.001159	0.0008979	0.0006954
6.45	0.002151	0.000734	0.0005606	0.002208	0.0007897	0.0005949	0.002098	0.000682	0.0005282	0.001925	0.0006567	0.0005016	0.001976	0.0007066	0.0005323	0.001878	0.0006102	0.0004726	0.002377	0.0008112	0.0006197	0.00244	0.0008728	0.0006575	0.002319	0.0007538	0.0005838
6.55	0.004873	0.0006218	0.000475	0.004858	0.0006752	0.0005087	0.004887	0.0005725	0.0004434	0.00436	0.0005564	0.000425	0.004346	0.0006042	0.0004551	0.004372	0.0005122	0.0003967	0.005386	0.0006873	0.000525	0.005369	0.0007463	0.0005622	0.005401	0.0006328	0.00049
6.65	0.004873	0.002435	0.0004024	0.004858	0.002438	0.000435	0.004887	0.002432	0.0003722	0.00436	0.002178	0.0003601	0.004346	0.002181	0.0003892	0.004372	0.002176	0.000333	0.005386	0.002691	0.0004448	0.005369	0.002694	0.0004808	0.005401	0.002688	0.0004114
6.75	0.004873	0.002903	0.0007632	0.004858	0.002893	0.0007835	0.004887	0.002911	0.0007445	0.00436	0.002597	0.0006829	0.004346	0.002589	0.000701	0.004372	0.002604	0.0006662	0.005386	0.003208	0.0008436	0.005369	0.003198	0.0008659	0.005401	0.003217	0.0008229
6.85	0.004873	0.002903	0.001729	0.004858	0.002893	0.001724	0.004887	0.002911	0.001734	0.00436	0.002597	0.001547	0.004346	0.002589	0.001542	0.004372	0.002604	0.001551	0.005386	0.003208	0.001911	0.005369	0.003198	0.001905	0.005401	0.003217	0.001916
6.95	0.003411	0.002903	0.001729	0.0034	0.002893	0.001724	0.003421	0.002911	0.001734	0.003052	0.002597	0.001547	0.003042	0.002589	0.001542	0.003061	0.002604	0.001551	0.00377	0.003208	0.001911	0.003758	0.003198	0.001905	0.003781	0.003217	0.001916
7.05	0	0.002903	0.001729	0	0.002893	0.001724	0	0.002911	0.001734	0	0.002597	0.001547	0	0.002589	0.001542	0	0.002604	0.001551	0	0.003208	0.001911	0	0.003198	0.001905	0	0.003217	0.001916
7.15	0	0.0005805	0.001729	0	0.0005787	0.001724	0	0.0005822	0.001734	0	0.0005194	0.001547	0	0.0005178	0.001542	0	0.0005209	0.001551	0	0.0006416	0.001911	0	0.0006396	0.001905	0	0.0006434	0.001916
7.25	0	0	0.00121	0	0	0.001206	0	0	0.001214	0	0	0.001083	0	0	0.001079	0	0	0.001086	0	0	0.001338	0	0	0.001333	0	0	0.001341
Karadere	Weights /Earthquake Rates
Magnitude	0.0375	0.075	0.0375	0.0375	0.075	0.0375	0.05	0.1	0.05	0.01875	0.0375	0.01875	0.01875	0.0375	0.01875	0.025	0.05	0.025	0.01875	0.0375	0.01875	0.01875	0.0375	0.01875	0.025	0.05	0.025
4.05	0.02534	0.01936	0.01479	0.02262	0.01704	0.01284	0.02839	0.02199	0.01703	0.02027	0.01549	0.01183	0.01809	0.01363	0.01027	0.02271	0.01759	0.01362	0.03041	0.02323	0.01774	0.02714	0.02045	0.0154	0.03407	0.02638	0.02043
4.15	0.02147	0.0164	0.01253	0.01934	0.01457	0.01098	0.02383	0.01846	0.01429	0.01718	0.01312	0.01002	0.01547	0.01165	0.00878	0.01906	0.01476	0.01143	0.02576	0.01968	0.01503	0.02321	0.01748	0.01317	0.0286	0.02215	0.01715
4.25	0.01819	0.01389	0.01061	0.01654	0.01246	0.009385	0.02	0.01549	0.012	0.01455	0.01112	0.00849	0.01323	0.009966	0.007508	0.016	0.01239	0.009599	0.02183	0.01667	0.01274	0.01984	0.01495	0.01126	0.02401	0.01859	0.0144
4.35	0.01541	0.01177	0.008992	0.01414	0.01065	0.008024	0.01679	0.01301	0.01007	0.01233	0.009417	0.007193	0.01131	0.008521	0.00642	0.01343	0.0104	0.008058	0.01849	0.01413	0.01079	0.01697	0.01278	0.009629	0.02015	0.01561	0.01209
4.45	0.01306	0.009973	0.007618	0.01209	0.009108	0.006861	0.0141	0.01092	0.008455	0.01045	0.007979	0.006094	0.009672	0.007286	0.005489	0.01128	0.008734	0.006764	0.01567	0.01197	0.009142	0.01451	0.01093	0.008234	0.01692	0.0131	0.01015
4.55	0.01106	0.00845	0.006454	0.01034	0.007788	0.005867	0.01183	0.009165	0.007098	0.00885	0.00676	0.005163	0.00827	0.00623	0.004694	0.009467	0.007332	0.005678	0.01327	0.01014	0.007745	0.0124	0.009345	0.00704	0.0142	0.011	0.008517
4.65	0.009372	0.007159	0.005468	0.008839	0.006659	0.005017	0.009934	0.007694	0.005958	0.007498	0.005727	0.004374	0.007071	0.005327	0.004013	0.007947	0.006155	0.004767	0.01125	0.00859	0.006562	0.01061	0.007991	0.00602	0.01192	0.009232	0.00715
4.75	0.00794	0.006065	0.004633	0.007558	0.005694	0.00429	0.008339	0.006458	0.005002	0.006352	0.004852	0.003706	0.006047	0.004555	0.003432	0.006671	0.005167	0.004001	0.009528	0.007278	0.005559	0.00907	0.006833	0.005147	0.01001	0.00775	0.006002
4.85	0.006727	0.005139	0.003925	0.006463	0.004869	0.003668	0.007001	0.005422	0.004199	0.005382	0.004111	0.00314	0.00517	0.003895	0.002934	0.0056	0.004337	0.003359	0.008073	0.006166	0.00471	0.007755	0.005842	0.004401	0.008401	0.006506	0.005039
4.95	0.0057	0.004353	0.003325	0.005526	0.004163	0.003136	0.005877	0.004551	0.003525	0.00456	0.003483	0.00266	0.004421	0.00333	0.002509	0.004701	0.003641	0.00282	0.006839	0.005224	0.00399	0.006631	0.004996	0.003764	0.007052	0.005461	0.00423
5.05	0.004829	0.003688	0.002817	0.004725	0.00356	0.002682	0.004933	0.003821	0.002959	0.003863	0.002951	0.002254	0.00378	0.002848	0.002145	0.003947	0.003056	0.002367	0.005795	0.004426	0.003381	0.00567	0.004272	0.003218	0.00592	0.004585	0.003551
5.15	0.004091	0.003125	0.002387	0.00404	0.003044	0.002293	0.004141	0.003207	0.002484	0.003273	0.0025	0.00191	0.003232	0.002435	0.001834	0.003313	0.002566	0.001987	0.004909	0.00375	0.002864	0.004848	0.003653	0.002752	0.004969	0.003849	0.002981
5.25	0.003466	0.002648	0.002022	0.003455	0.002603	0.001961	0.003476	0.002692	0.002085	0.002773	0.002118	0.001618	0.002764	0.002082	0.001569	0.002781	0.002154	0.001668	0.004159	0.003177	0.002427	0.004146	0.003123	0.002353	0.004172	0.003231	0.002502
5.35	0.002937	0.002243	0.001713	0.002954	0.002225	0.001677	0.002918	0.00226	0.00175	0.002349	0.001794	0.001371	0.002363	0.00178	0.001341	0.002335	0.001808	0.0014	0.003524	0.002692	0.002056	0.003545	0.002671	0.002012	0.003502	0.002712	0.0021
5.45	0.002488	0.0019	0.001452	0.002526	0.001903	0.001434	0.00245	0.001897	0.001469	0.00199	0.00152	0.001161	0.002021	0.001522	0.001147	0.00196	0.001518	0.001175	0.002986	0.00228	0.001742	0.003031	0.002283	0.00172	0.00294	0.002277	0.001763
5.55	0.002108	0.00161	0.00123	0.00216	0.001627	0.001226	0.002057	0.001593	0.001233	0.001686	0.001288	0.0009838	0.001728	0.001302	0.0009806	0.001645	0.001274	0.0009868	0.002529	0.001932	0.001476	0.002592	0.001953	0.001471	0.002468	0.001911	0.00148
5.65	0.001786	0.001364	0.001042	0.001847	0.001391	0.001048	0.001726	0.001337	0.001035	0.001429	0.001091	0.0008335	0.001477	0.001113	0.0008385	0.001381	0.00107	0.0008284	0.002143	0.001637	0.00125	0.002216	0.00167	0.001258	0.002072	0.001604	0.001243
5.75	0.001513	0.001156	0.0008827	0.001579	0.00119	0.0008962	0.001449	0.001122	0.0008692	0.00121	0.0009245	0.0007062	0.001263	0.0009517	0.000717	0.001159	0.0008979	0.0006954	0.001816	0.001387	0.001059	0.001895	0.001428	0.001075	0.001739	0.001347	0.001043
5.85	0.001282	0.0009791	0.0007479	0.00135	0.001017	0.0007663	0.001217	0.0009422	0.0007297	0.001025	0.0007833	0.0005983	0.00108	0.0008138	0.0006131	0.0009732	0.0007537	0.0005837	0.001538	0.001175	0.0008975	0.00162	0.001221	0.0009196	0.00146	0.001131	0.0008756
5.95	0.001086	0.0008295	0.0006336	0.001155	0.0008698	0.0006553	0.001021	0.0007909	0.0006125	0.0008688	0.0006636	0.0005069	0.0009236	0.0006958	0.0005242	0.000817	0.0006327	0.00049	0.001303	0.0009954	0.0007604	0.001385	0.001044	0.0007863	0.001225	0.0009491	0.000735
6.05	0.0009201	0.0007028	0.0005368	0.0009872	0.0007437	0.0005603	0.0008573	0.0006639	0.0005142	0.0007361	0.0005622	0.0004295	0.0007898	0.000595	0.0004482	0.0006858	0.0005312	0.0004114	0.001104	0.0008434	0.0006442	0.001185	0.0008925	0.0006723	0.001029	0.0007967	0.000617
6.15	0.0007795	0.0005954	0.0004548	0.0008441	0.0006359	0.0004791	0.0007197	0.0005574	0.0004316	0.0006236	0.0004764	0.0003639	0.0006753	0.0005087	0.0003833	0.0005757	0.0004459	0.0003453	0.0009354	0.0007145	0.0005458	0.001013	0.0007631	0.0005749	0.0008636	0.0006688	0.000518
6.25	0.002075	0.0005045	0.0003853	0.002101	0.0005438	0.0004097	0.002051	0.0004679	0.0003624	0.00166	0.0004036	0.0003083	0.00168	0.000435	0.0003277	0.001641	0.0003743	0.0002899	0.00249	0.0006054	0.0004624	0.002521	0.0006525	0.0004916	0.002462	0.0005615	0.0004348
6.35	0.003462	0.0004274	0.0003265	0.003451	0.000465	0.0003503	0.003472	0.0003928	0.0003042	0.00277	0.0003419	0.0002612	0.002761	0.000372	0.0002802	0.002778	0.0003142	0.0002433	0.004155	0.0005129	0.0003918	0.004141	0.000558	0.0004203	0.004166	0.0004713	0.000365
6.45	0.003462	0.002062	0.0002766	0.003451	0.002056	0.0002995	0.003472	0.002068	0.0002553	0.00277	0.00165	0.0002213	0.002761	0.001645	0.0002396	0.002778	0.001654	0.0002043	0.004155	0.002475	0.0003319	0.004141	0.002467	0.0003594	0.004166	0.002482	0.0003064
6.55	0.003462	0.002062	0.0007362	0.003451	0.002056	0.0007453	0.003472	0.002068	0.0007278	0.00277	0.00165	0.000589	0.002761	0.001645	0.0005963	0.002778	0.001654	0.0005822	0.004155	0.002475	0.0008835	0.004141	0.002467	0.0008944	0.004166	0.002482	0.0008734
6.65	0.003462	0.002062	0.001228	0.003451	0.002056	0.001225	0.003472	0.002068	0.001232	0.00277	0.00165	0.0009827	0.002761	0.001645	0.0009796	0.002778	0.001654	0.0009855	0.004155	0.002475	0.001474	0.004141	0.002467	0.001469	0.004166	0.002482	0.001478
6.75	0.001731	0.002062	0.001228	0.001726	0.002056	0.001225	0.001736	0.002068	0.001232	0.001385	0.00165	0.0009827	0.00138	0.001645	0.0009796	0.001389	0.001654	0.0009855	0.002077	0.002475	0.001474	0.002071	0.002467	0.001469	0.002083	0.002482	0.001478
6.85	0	0.002062	0.001228	0	0.002056	0.001225	0	0.002068	0.001232	0	0.00165	0.0009827	0	0.001645	0.0009796	0	0.001654	0.0009855	0	0.002475	0.001474	0	0.002467	0.001469	0	0.002482	0.001478
6.95	0	9.833e-09	0.001228	0	9.803e-09	0.001225	0	9.862e-09	0.001232	0	7.867e-09	0.0009827	0	7.842e-09	0.0009796	0	7.889e-09	0.0009855	0	1.18e-08	0.001474	0	1.176e-08	0.001469	0	1.183e-08	0.001478
7.05	0	0	0.0006142	0	0	0.0006123	0	0	0.0006159	0	0	0.0004914	0	0	0.0004898	0	0	0.0004928	0	0	0.000737	0	0	0.0007347	0	0	0.0007391
Cinarcik+Hersek-Golcuk			Weights /Earthquake Rates
Magnitude	0.0375	0.075	0.0375	0.0375	0.075	0.0375	0.05	0.1	0.05	0.01875	0.0375	0.01875	0.01875	0.0375	0.01875	0.025	0.05	0.025	0.01875	0.0375	0.01875	0.01875	0.0375	0.01875	0.025	0.05	0.025
4.05	0.06421	0.04904	0.03746	0.05417	0.04081	0.03074	0.07608	0.05892	0.04563	0.05815	0.04442	0.03393	0.04906	0.03696	0.02784	0.0689	0.05336	0.04133	0.07026	0.05367	0.04099	0.05928	0.04466	0.03364	0.08326	0.06448	0.04994
4.15	0.0544	0.04155	0.03174	0.04632	0.03489	0.02629	0.06387	0.04946	0.03831	0.04927	0.03763	0.02874	0.04195	0.0316	0.02381	0.05784	0.0448	0.03469	0.05953	0.04547	0.03473	0.05069	0.03819	0.02877	0.06989	0.05413	0.04192
4.25	0.04609	0.0352	0.02689	0.03961	0.02984	0.02248	0.05361	0.04152	0.03216	0.04174	0.03188	0.02435	0.03587	0.02702	0.02036	0.04856	0.0376	0.02912	0.05043	0.03852	0.02943	0.04334	0.03265	0.0246	0.05867	0.04544	0.03519
4.35	0.03905	0.02982	0.02278	0.03387	0.02551	0.01922	0.04501	0.03486	0.02699	0.03536	0.02701	0.02063	0.03067	0.02311	0.01741	0.04076	0.03157	0.02445	0.04273	0.03264	0.02493	0.03706	0.02792	0.02103	0.04925	0.03814	0.02954
4.45	0.03308	0.02527	0.0193	0.02896	0.02182	0.01643	0.03778	0.02926	0.02266	0.02996	0.02288	0.01748	0.02623	0.01976	0.01488	0.03422	0.0265	0.02052	0.0362	0.02765	0.02112	0.03169	0.02387	0.01798	0.04135	0.03202	0.0248
4.55	0.02803	0.02141	0.01635	0.02476	0.01865	0.01405	0.03172	0.02456	0.01902	0.02538	0.01939	0.01481	0.02242	0.01689	0.01273	0.02872	0.02225	0.01723	0.03067	0.02343	0.01789	0.0271	0.02041	0.01538	0.03471	0.02688	0.02082
4.65	0.02375	0.01814	0.01385	0.02117	0.01595	0.01202	0.02662	0.02062	0.01597	0.02151	0.01643	0.01255	0.01917	0.01445	0.01088	0.02411	0.01867	0.01446	0.02599	0.01985	0.01516	0.02317	0.01745	0.01315	0.02914	0.02256	0.01748
4.75	0.02012	0.01537	0.01174	0.0181	0.01364	0.01027	0.02235	0.01731	0.01341	0.01822	0.01392	0.01063	0.0164	0.01235	0.009305	0.02024	0.01568	0.01214	0.02202	0.01682	0.01284	0.01981	0.01492	0.01124	0.02446	0.01894	0.01467
4.85	0.01704	0.01302	0.009944	0.01548	0.01166	0.008785	0.01876	0.01453	0.01125	0.01544	0.01179	0.009006	0.01402	0.01056	0.007956	0.01699	0.01316	0.01019	0.01865	0.01425	0.01088	0.01694	0.01276	0.009614	0.02053	0.0159	0.01231
4.95	0.01444	0.01103	0.008425	0.01324	0.009971	0.007512	0.01575	0.0122	0.009447	0.01308	0.009989	0.00763	0.01199	0.009031	0.006803	0.01426	0.01105	0.008555	0.0158	0.01207	0.00922	0.01448	0.01091	0.008221	0.01724	0.01335	0.01034
5.05	0.01223	0.009345	0.007138	0.01132	0.008526	0.006423	0.01322	0.01024	0.00793	0.01108	0.008463	0.006465	0.01025	0.007722	0.005817	0.01197	0.009273	0.007182	0.01339	0.01023	0.007811	0.01239	0.009331	0.007029	0.01447	0.01121	0.008678
5.15	0.01037	0.007917	0.006048	0.009677	0.00729	0.005492	0.0111	0.008595	0.006657	0.009387	0.00717	0.005477	0.008764	0.006603	0.004974	0.01005	0.007785	0.006029	0.01134	0.008664	0.006618	0.01059	0.007978	0.00601	0.01215	0.009406	0.007285
5.25	0.008782	0.006708	0.005124	0.008275	0.006234	0.004696	0.009317	0.007216	0.005588	0.007953	0.006075	0.00464	0.007494	0.005646	0.004253	0.008438	0.006535	0.005061	0.00961	0.007341	0.005607	0.009055	0.006822	0.005139	0.0102	0.007896	0.006115
5.35	0.00744	0.005683	0.004341	0.007075	0.00533	0.004016	0.007821	0.006057	0.004691	0.006738	0.005147	0.003931	0.006408	0.004827	0.003637	0.007083	0.005486	0.004249	0.008142	0.006219	0.00475	0.007743	0.005833	0.004394	0.008559	0.006629	0.005134
5.45	0.006303	0.004815	0.003678	0.00605	0.004558	0.003434	0.006566	0.005085	0.003938	0.005709	0.004361	0.003331	0.005479	0.004128	0.00311	0.005946	0.004605	0.003566	0.006898	0.005269	0.004025	0.006621	0.004988	0.003758	0.007185	0.005564	0.004309
5.55	0.00534	0.004079	0.003116	0.005173	0.003897	0.002936	0.005512	0.004268	0.003306	0.004837	0.003694	0.002822	0.004685	0.00353	0.002659	0.004992	0.003866	0.002994	0.005844	0.004464	0.00341	0.005661	0.004265	0.003213	0.006031	0.004671	0.003618
5.65	0.004525	0.003456	0.00264	0.004423	0.003332	0.00251	0.004627	0.003583	0.002775	0.004098	0.00313	0.002391	0.004006	0.003018	0.002274	0.00419	0.003245	0.002513	0.004951	0.003782	0.002889	0.004841	0.003647	0.002747	0.005063	0.003921	0.003037
5.75	0.003833	0.002928	0.002237	0.003782	0.002849	0.002147	0.003884	0.003008	0.00233	0.003472	0.002652	0.002026	0.003425	0.002581	0.001944	0.003518	0.002724	0.00211	0.004195	0.003204	0.002448	0.004139	0.003118	0.002349	0.00425	0.003292	0.002549
5.85	0.003248	0.002481	0.001895	0.003234	0.002436	0.001836	0.00326	0.002525	0.001956	0.002941	0.002247	0.001716	0.002929	0.002207	0.001662	0.002953	0.002287	0.001771	0.003554	0.002715	0.002074	0.003539	0.002666	0.002009	0.003568	0.002763	0.00214
5.95	0.002752	0.002102	0.001605	0.002765	0.002083	0.001569	0.002737	0.00212	0.001642	0.002492	0.001903	0.001454	0.002504	0.001887	0.001421	0.002479	0.00192	0.001487	0.003011	0.0023	0.001757	0.003026	0.00228	0.001718	0.002995	0.00232	0.001796
6.05	0.002331	0.001781	0.00136	0.002365	0.001781	0.001342	0.002298	0.001779	0.001378	0.002111	0.001613	0.001232	0.002142	0.001613	0.001215	0.002081	0.001612	0.001248	0.002551	0.001949	0.001488	0.002588	0.001949	0.001469	0.002514	0.001947	0.001508
6.15	0.001975	0.001509	0.001152	0.002022	0.001523	0.001148	0.001929	0.001494	0.001157	0.001789	0.001366	0.001044	0.001831	0.001379	0.001039	0.001747	0.001353	0.001048	0.002161	0.001651	0.001261	0.002213	0.001667	0.001256	0.002111	0.001635	0.001266
6.25	0.001673	0.001278	0.0009763	0.001729	0.001302	0.0009812	0.001619	0.001254	0.0009711	0.001515	0.001158	0.0008842	0.001566	0.00118	0.0008886	0.001466	0.001136	0.0008795	0.001831	0.001399	0.001068	0.001892	0.001425	0.001074	0.001772	0.001372	0.001063
6.35	0.001418	0.001083	0.0008271	0.001478	0.001114	0.000839	0.001359	0.001053	0.0008152	0.001284	0.0009807	0.0007491	0.001339	0.001009	0.0007598	0.001231	0.0009533	0.0007383	0.001551	0.001185	0.0009052	0.001618	0.001219	0.0009181	0.001487	0.001152	0.0008921
6.45	0.001201	0.0009174	0.0007008	0.001264	0.0009523	0.0007174	0.001141	0.0008836	0.0006843	0.001088	0.0008309	0.0006347	0.001145	0.0008624	0.0006497	0.001033	0.0008003	0.0006198	0.001314	0.001004	0.0007669	0.001383	0.001042	0.0007851	0.001249	0.000967	0.0007489
6.55	0.001018	0.0007773	0.0005937	0.001081	0.0008142	0.0006134	0.0009578	0.0007418	0.0005745	0.0009216	0.000704	0.0005377	0.0009789	0.0007374	0.0005555	0.0008674	0.0006718	0.0005203	0.001114	0.0008506	0.0006497	0.001183	0.0008911	0.0006713	0.001048	0.0008118	0.0006287
6.65	0.0008621	0.0006585	0.000503	0.0009242	0.0006962	0.0005245	0.000804	0.0006227	0.0004822	0.0007808	0.0005964	0.0004556	0.000837	0.0006306	0.000475	0.0007282	0.0005639	0.0004368	0.0009435	0.0007207	0.0005505	0.001011	0.0007619	0.000574	0.0008799	0.0006814	0.0005277
6.75	0.0007304	0.0005579	0.0004262	0.0007902	0.0005953	0.0004485	0.0006749	0.0005227	0.0004048	0.0006615	0.0005053	0.000386	0.0007157	0.0005392	0.0004062	0.0006113	0.0004734	0.0003666	0.0007993	0.0006106	0.0004664	0.0008648	0.0006515	0.0004908	0.0007386	0.000572	0.000443
6.85	0.00166	0.0004727	0.0003611	0.00169	0.000509	0.0003835	0.001632	0.0004388	0.0003398	0.001503	0.0004281	0.000327	0.001531	0.000461	0.0003473	0.001478	0.0003974	0.0003078	0.001816	0.0005173	0.0003951	0.00185	0.0005571	0.0004197	0.001786	0.0004802	0.0003719
6.95	0.003191	0.0004005	0.0003059	0.003181	0.0004353	0.0003279	0.0032	0.0003684	0.0002853	0.00289	0.0003627	0.000277	0.002881	0.0003942	0.000297	0.002898	0.0003336	0.0002584	0.003492	0.0004383	0.0003348	0.003481	0.0004763	0.0003588	0.003502	0.0004031	0.0003122
7.05	0.003191	0.001747	0.0002592	0.003181	0.001745	0.0002804	0.0032	0.001749	0.0002395	0.00289	0.001582	0.0002347	0.002881	0.00158	0.0002539	0.002898	0.001584	0.0002169	0.003492	0.001912	0.0002836	0.003481	0.00191	0.0003068	0.003502	0.001914	0.0002621
7.15	0.003191	0.001901	0.0005889	0.003181	0.001895	0.0005997	0.0032	0.001906	0.0005789	0.00289	0.001721	0.0005334	0.002881	0.001716	0.0005432	0.002898	0.001726	0.0005243	0.003492	0.00208	0.0006445	0.003481	0.002073	0.0006563	0.003502	0.002086	0.0006336
7.25	0.003191	0.001901	0.001132	0.003181	0.001895	0.001129	0.0032	0.001906	0.001135	0.00289	0.001721	0.001025	0.002881	0.001716	0.001022	0.002898	0.001726	0.001028	0.003492	0.00208	0.001239	0.003481	0.002073	0.001235	0.003502	0.002086	0.001242
7.35	0.001914	0.001901	0.001132	0.001908	0.001895	0.001129	0.00192	0.001906	0.001135	0.001734	0.001721	0.001025	0.001728	0.001716	0.001022	0.001739	0.001726	0.001028	0.002095	0.00208	0.001239	0.002088	0.002073	0.001235	0.002101	0.002086	0.001242
7.45	0	0.001901	0.001132	0	0.001895	0.001129	0	0.001906	0.001135	0	0.001721	0.001025	0	0.001716	0.001022	0	0.001726	0.001028	0	0.00208	0.001239	0	0.002073	0.001235	0	0.002086	0.001242
7.55	0	0.0001901	0.001132	0	0.0001895	0.001129	0	0.0001906	0.001135	0	0.0001721	0.001025	0	0.0001716	0.001022	0	0.0001726	0.001028	0	0.000208	0.001239	0	0.0002073	0.001235	0	0.0002086	0.001242
7.65	0	0	0.0006793	0	0	0.0006771	0	0	0.0006812	0	0	0.0006152	0	0	0.0006132	0	0	0.0006169	0	0	0.0007433	0	0	0.000741	0	0	0.0007454
Hersek-Golcuk+Izmit			Weights /Earthquake Rates
Magnitude	0.0375	0.075	0.0375	0.0375	0.075	0.0375	0.05	0.1	0.05	0.01875	0.0375	0.01875	0.01875	0.0375	0.01875	0.025	0.05	0.025	0.01875	0.0375	0.01875	0.01875	0.0375	0.01875	0.025	0.05	0.025
4.05	0.05527	0.04222	0.03225	0.04672	0.0352	0.02652	0.06538	0.05063	0.03921	0.04946	0.03778	0.02885	0.0418	0.03149	0.02372	0.05849	0.0453	0.03508	0.06109	0.04667	0.03564	0.05164	0.0389	0.02931	0.07226	0.05596	0.04334
4.15	0.04683	0.03577	0.02732	0.03995	0.0301	0.02267	0.05488	0.0425	0.03292	0.0419	0.03201	0.02445	0.03574	0.02693	0.02029	0.0491	0.03803	0.02945	0.05176	0.03954	0.0302	0.04415	0.03326	0.02506	0.06066	0.04698	0.03638
4.25	0.03968	0.03031	0.02315	0.03416	0.02573	0.01939	0.04607	0.03568	0.02763	0.0355	0.02712	0.02071	0.03056	0.02302	0.01735	0.04122	0.03192	0.02472	0.04385	0.0335	0.02559	0.03775	0.02844	0.02143	0.05092	0.03944	0.03054
4.35	0.03361	0.02568	0.01961	0.02921	0.022	0.01658	0.03867	0.02995	0.0232	0.03008	0.02297	0.01755	0.02613	0.01969	0.01483	0.0346	0.0268	0.02075	0.03715	0.02838	0.02168	0.03228	0.02432	0.01832	0.04274	0.0331	0.02564
4.45	0.02848	0.02175	0.01662	0.02497	0.01881	0.01417	0.03247	0.02514	0.01947	0.02548	0.01946	0.01487	0.02235	0.01683	0.01268	0.02905	0.0225	0.01742	0.03148	0.02404	0.01837	0.0276	0.0208	0.01567	0.03588	0.02779	0.02152
4.55	0.02413	0.01843	0.01408	0.02136	0.01609	0.01212	0.02725	0.02111	0.01635	0.02159	0.01649	0.0126	0.01911	0.01439	0.01084	0.02438	0.01888	0.01463	0.02667	0.02037	0.01556	0.0236	0.01778	0.0134	0.03012	0.02333	0.01807
4.65	0.02044	0.01561	0.01193	0.01826	0.01376	0.01036	0.02288	0.01772	0.01372	0.01829	0.01397	0.01067	0.01634	0.01231	0.009273	0.02047	0.01585	0.01228	0.02259	0.01726	0.01318	0.02018	0.0152	0.01145	0.02529	0.01958	0.01517
4.75	0.01732	0.01323	0.0101	0.01561	0.01176	0.008861	0.01921	0.01487	0.01152	0.0155	0.01184	0.009041	0.01397	0.01052	0.007929	0.01718	0.01331	0.01031	0.01914	0.01462	0.01117	0.01726	0.013	0.009794	0.02123	0.01644	0.01273
4.85	0.01467	0.01121	0.008561	0.01335	0.01006	0.007577	0.01612	0.01249	0.00967	0.01313	0.01003	0.00766	0.01195	0.008999	0.00678	0.01442	0.01117	0.008652	0.01622	0.01239	0.009462	0.01476	0.01112	0.008375	0.01782	0.0138	0.01069
4.95	0.01243	0.009496	0.007253	0.01142	0.0086	0.006479	0.01353	0.01048	0.008117	0.01112	0.008496	0.00649	0.01021	0.007695	0.005797	0.01211	0.009378	0.007263	0.01374	0.0105	0.008017	0.01262	0.009505	0.007161	0.01496	0.01158	0.008972
5.05	0.01053	0.008045	0.006145	0.009761	0.007354	0.00554	0.01136	0.008799	0.006814	0.009424	0.007198	0.005498	0.008734	0.00658	0.004957	0.01017	0.007873	0.006097	0.01164	0.008892	0.006792	0.01079	0.008128	0.006123	0.01256	0.009725	0.007532
5.15	0.008923	0.006816	0.005206	0.008346	0.006288	0.004737	0.009537	0.007386	0.00572	0.007984	0.006098	0.004658	0.007468	0.005626	0.004238	0.008533	0.006609	0.005118	0.009863	0.007533	0.005754	0.009225	0.00695	0.005236	0.01054	0.008164	0.006322
5.25	0.00756	0.005775	0.004411	0.007137	0.005377	0.00405	0.008006	0.0062	0.004802	0.006764	0.005167	0.003947	0.006386	0.004811	0.003624	0.007163	0.005548	0.004296	0.008356	0.006383	0.004875	0.007888	0.005942	0.004477	0.008849	0.006853	0.005307
5.35	0.006405	0.004892	0.003737	0.006102	0.004597	0.003463	0.006721	0.005205	0.004031	0.005731	0.004377	0.003344	0.00546	0.004113	0.003099	0.006013	0.004657	0.003607	0.007079	0.005407	0.00413	0.006745	0.005081	0.003828	0.007428	0.005753	0.004455
5.45	0.005427	0.004145	0.003166	0.005218	0.003931	0.002961	0.005642	0.004369	0.003384	0.004855	0.003709	0.002833	0.004669	0.003517	0.00265	0.005048	0.003909	0.003028	0.005998	0.004581	0.003499	0.005767	0.004345	0.003273	0.006236	0.004829	0.00374
5.55	0.004598	0.003512	0.002682	0.004462	0.003361	0.002532	0.004736	0.003668	0.002841	0.004114	0.003142	0.0024	0.003992	0.003007	0.002266	0.004238	0.003282	0.002542	0.005081	0.003881	0.002965	0.004931	0.003715	0.002799	0.005235	0.004054	0.00314
5.65	0.003895	0.002975	0.002273	0.003815	0.002874	0.002165	0.003976	0.003079	0.002385	0.003485	0.002662	0.002033	0.003413	0.002572	0.001937	0.003557	0.002755	0.002134	0.004305	0.003288	0.002512	0.004217	0.003177	0.002393	0.004394	0.003403	0.002636
5.75	0.0033	0.002521	0.001925	0.003262	0.002458	0.001851	0.003337	0.002585	0.002002	0.002953	0.002255	0.001723	0.002919	0.002199	0.001657	0.002986	0.002313	0.001791	0.003647	0.002786	0.002128	0.003606	0.002716	0.002046	0.003689	0.002857	0.002213
5.85	0.002796	0.002136	0.001631	0.002789	0.002101	0.001583	0.002802	0.00217	0.00168	0.002502	0.001911	0.00146	0.002496	0.00188	0.001416	0.002507	0.001941	0.001504	0.00309	0.00236	0.001803	0.003083	0.002323	0.00175	0.003097	0.002398	0.001857
5.95	0.002369	0.001809	0.001382	0.002385	0.001797	0.001354	0.002352	0.001821	0.001411	0.002119	0.001619	0.001237	0.002134	0.001608	0.001211	0.002104	0.00163	0.001262	0.002618	0.002	0.001528	0.002636	0.001986	0.001496	0.002599	0.002013	0.001559
6.05	0.002007	0.001533	0.001171	0.002039	0.001536	0.001157	0.001974	0.001529	0.001184	0.001796	0.001372	0.001048	0.001825	0.001375	0.001036	0.001766	0.001368	0.00106	0.002218	0.001694	0.001294	0.002254	0.001698	0.001279	0.002182	0.00169	0.001309
6.15	0.0017	0.001299	0.000992	0.001744	0.001314	0.0009897	0.001657	0.001284	0.0009941	0.001521	0.001162	0.0008876	0.00156	0.001175	0.0008855	0.001483	0.001148	0.0008894	0.001879	0.001435	0.001096	0.001927	0.001452	0.001094	0.001832	0.001419	0.001099
6.25	0.001441	0.0011	0.0008405	0.001491	0.001123	0.0008463	0.001391	0.001078	0.0008345	0.001289	0.0009845	0.000752	0.001334	0.001005	0.0007572	0.001245	0.0009641	0.0007466	0.001592	0.001216	0.0009289	0.001648	0.001242	0.0009353	0.001538	0.001191	0.0009223
6.35	0.00122	0.0009322	0.0007121	0.001275	0.0009605	0.0007236	0.001168	0.0009045	0.0007005	0.001092	0.0008341	0.0006371	0.001141	0.0008594	0.0006474	0.001045	0.0008093	0.0006268	0.001349	0.00103	0.000787	0.001409	0.001062	0.0007998	0.001291	0.0009997	0.0007743
6.45	0.001034	0.0007898	0.0006033	0.00109	0.0008213	0.0006187	0.0009804	0.0007593	0.0005881	0.0009252	0.0007067	0.0005398	0.0009754	0.0007348	0.0005536	0.0008772	0.0006794	0.0005262	0.001143	0.000873	0.0006668	0.001205	0.0009078	0.0006839	0.001084	0.0008392	0.00065
6.55	0.000876	0.0006692	0.0005111	0.0009322	0.0007023	0.0005291	0.000823	0.0006374	0.0004936	0.0007838	0.0005987	0.0004573	0.0008341	0.0006283	0.0004734	0.0007364	0.0005703	0.0004417	0.0009683	0.0007396	0.0005649	0.00103	0.0007762	0.0005847	0.0009097	0.0007045	0.0005456
6.65	0.0007422	0.0005669	0.000433	0.0007971	0.0006005	0.0004524	0.0006909	0.0005351	0.0004144	0.0006641	0.0005072	0.0003875	0.0007132	0.0005373	0.0004048	0.0006182	0.0004788	0.0003708	0.0008203	0.0006266	0.0004786	0.000881	0.0006637	0.0005	0.0007636	0.0005914	0.000458
6.75	0.0006288	0.0004803	0.0003669	0.0006816	0.0005135	0.0003868	0.00058	0.0004492	0.0003479	0.0005626	0.0004298	0.0003283	0.0006098	0.0004594	0.0003461	0.0005189	0.0004019	0.0003113	0.000695	0.0005309	0.0004055	0.0007533	0.0005675	0.0004275	0.000641	0.0004965	0.0003845
6.85	0.001927	0.0004069	0.0003108	0.001942	0.000439	0.0003308	0.001914	0.0003771	0.000292	0.001725	0.0003641	0.0002781	0.001738	0.0003928	0.0002959	0.001712	0.0003374	0.0002613	0.00213	0.0004498	0.0003436	0.002147	0.0004853	0.0003656	0.002115	0.0004168	0.0003228
6.95	0.002839	0.0004819	0.0002633	0.00283	0.0005091	0.0002828	0.002847	0.0004569	0.0002451	0.002541	0.0004312	0.0002356	0.002533	0.0004555	0.000253	0.002548	0.0004088	0.0002193	0.003138	0.0005327	0.0002911	0.003128	0.0005626	0.0003126	0.003147	0.000505	0.0002709
7.05	0.002839	0.001691	0.0002231	0.00283	0.001686	0.0002418	0.002847	0.001696	0.0002058	0.002541	0.001513	0.0001996	0.002533	0.001509	0.0002164	0.002548	0.001518	0.0001841	0.003138	0.001869	0.0002466	0.003128	0.001863	0.0002673	0.003147	0.001875	0.0002274
7.15	0.002839	0.001691	0.0006839	0.00283	0.001686	0.0006892	0.002847	0.001696	0.0006789	0.002541	0.001513	0.0006119	0.002533	0.001509	0.0006166	0.002548	0.001518	0.0006075	0.003138	0.001869	0.0007559	0.003128	0.001863	0.0007617	0.003147	0.001875	0.0007504
7.25	0.002839	0.001691	0.001007	0.00283	0.001686	0.001004	0.002847	0.001696	0.00101	0.002541	0.001513	0.0009014	0.002533	0.001509	0.0008986	0.002548	0.001518	0.000904	0.003138	0.001869	0.001114	0.003128	0.001863	0.00111	0.003147	0.001875	0.001117
7.35	0.001136	0.001691	0.001007	0.001132	0.001686	0.001004	0.001139	0.001696	0.00101	0.001016	0.001513	0.0009014	0.001013	0.001509	0.0008986	0.001019	0.001518	0.000904	0.001255	0.001869	0.001114	0.001251	0.001863	0.00111	0.001259	0.001875	0.001117
7.45	0	0.001522	0.001007	0	0.001517	0.001004	0	0.001527	0.00101	0	0.001362	0.0009014	0	0.001358	0.0008986	0	0.001366	0.000904	0	0.001682	0.001114	0	0.001677	0.00111	0	0.001687	0.001117
7.55	0	0	0.001007	0	0	0.001004	0	0	0.00101	0	0	0.0009014	0	0	0.0008986	0	0	0.000904	0	0	0.001114	0	0	0.00111	0	0	0.001117
7.65	0	0	0.000403	0	0	0.0004017	0	0	0.0004041	0	0	0.0003606	0	0	0.0003594	0	0	0.0003616	0	0	0.0004454	0	0	0.000444	0	0	0.0004467
Izmit+Sapanca_Akyazi		Weights /Earthquake Rates
Magnitude	0.0375	0.075	0.0375	0.0375	0.075	0.0375	0.05	0.1	0.05	0.01875	0.0375	0.01875	0.01875	0.0375	0.01875	0.025	0.05	0.025	0.01875	0.0375	0.01875	0.01875	0.0375	0.01875	0.025	0.05	0.025
4.05	0.05504	0.04204	0.03211	0.04691	0.03534	0.02662	0.06456	0.05	0.03873	0.04925	0.03762	0.02873	0.04197	0.03162	0.02382	0.05777	0.04474	0.03465	0.06084	0.04647	0.0355	0.05185	0.03906	0.02943	0.07136	0.05527	0.0428
4.15	0.04663	0.03562	0.02721	0.04011	0.03022	0.02277	0.0542	0.04198	0.03251	0.04173	0.03187	0.02434	0.03589	0.02704	0.02037	0.04849	0.03756	0.02909	0.05154	0.03937	0.03007	0.04434	0.0334	0.02516	0.0599	0.04639	0.03593
4.25	0.03951	0.03018	0.02305	0.0343	0.02584	0.01947	0.0455	0.03524	0.02729	0.03535	0.027	0.02063	0.03069	0.02312	0.01742	0.04071	0.03153	0.02442	0.04367	0.03336	0.02548	0.03791	0.02856	0.02152	0.05029	0.03895	0.03016
4.35	0.03347	0.02557	0.01953	0.02933	0.02209	0.01664	0.03819	0.02958	0.02291	0.02995	0.02288	0.01747	0.02624	0.01977	0.01489	0.03417	0.02647	0.0205	0.037	0.02826	0.02159	0.03242	0.02442	0.0184	0.04221	0.03269	0.02532
4.45	0.02836	0.02166	0.01655	0.02508	0.01889	0.01423	0.03206	0.02483	0.01923	0.02537	0.01938	0.0148	0.02244	0.0169	0.01273	0.02869	0.02222	0.01721	0.03135	0.02394	0.01829	0.02772	0.02088	0.01573	0.03544	0.02744	0.02126
4.55	0.02403	0.01835	0.01402	0.02144	0.01615	0.01217	0.02692	0.02084	0.01614	0.0215	0.01642	0.01254	0.01919	0.01445	0.01089	0.02408	0.01865	0.01444	0.02656	0.02028	0.01549	0.0237	0.01785	0.01345	0.02975	0.02304	0.01784
4.65	0.02036	0.01555	0.01188	0.01834	0.01381	0.01041	0.02259	0.0175	0.01355	0.01821	0.01391	0.01063	0.01641	0.01236	0.009311	0.02022	0.01566	0.01213	0.0225	0.01719	0.01313	0.02027	0.01527	0.0115	0.02497	0.01934	0.01498
4.75	0.01725	0.01317	0.01006	0.01568	0.01181	0.008898	0.01897	0.01469	0.01138	0.01543	0.01179	0.009003	0.01403	0.01057	0.007961	0.01697	0.01314	0.01018	0.01906	0.01456	0.01112	0.01733	0.01305	0.009834	0.02096	0.01624	0.01257
4.85	0.01461	0.01116	0.008525	0.01341	0.0101	0.007608	0.01592	0.01233	0.00955	0.01307	0.009986	0.007628	0.01199	0.009036	0.006807	0.01425	0.01103	0.008545	0.01615	0.01234	0.009423	0.01482	0.01116	0.008409	0.0176	0.01363	0.01056
4.95	0.01238	0.009456	0.007223	0.01146	0.008635	0.006506	0.01337	0.01035	0.008017	0.01108	0.008461	0.006462	0.01026	0.007726	0.005821	0.01196	0.009262	0.007173	0.01368	0.01045	0.007983	0.01267	0.009544	0.00719	0.01477	0.01144	0.008861
5.05	0.01049	0.008011	0.006119	0.009801	0.007384	0.005563	0.01122	0.00869	0.00673	0.009384	0.007168	0.005475	0.00877	0.006607	0.004977	0.01004	0.007775	0.006021	0.01159	0.008855	0.006763	0.01083	0.008161	0.006148	0.0124	0.009604	0.007438
5.15	0.008886	0.006787	0.005184	0.008381	0.006314	0.004756	0.009419	0.007295	0.005649	0.007951	0.006073	0.004639	0.007499	0.005649	0.004256	0.008427	0.006527	0.005055	0.009821	0.007502	0.00573	0.009263	0.006978	0.005257	0.01041	0.008062	0.006244
5.25	0.007528	0.00575	0.004392	0.007166	0.005399	0.004067	0.007907	0.006123	0.004742	0.006736	0.005145	0.00393	0.006412	0.00483	0.003639	0.007074	0.005479	0.004243	0.008321	0.006356	0.004855	0.00792	0.005967	0.004495	0.008739	0.006768	0.005242
5.35	0.006378	0.004872	0.003721	0.006127	0.004616	0.003478	0.006637	0.00514	0.003981	0.005707	0.004359	0.00333	0.005482	0.00413	0.003112	0.005939	0.004599	0.003562	0.00705	0.005385	0.004113	0.006772	0.005102	0.003844	0.007336	0.005681	0.0044
5.45	0.005404	0.004128	0.003153	0.005239	0.003947	0.002974	0.005572	0.004315	0.003342	0.004835	0.003693	0.002821	0.004688	0.003532	0.002661	0.004985	0.003861	0.00299	0.005973	0.004562	0.003485	0.005791	0.004363	0.003287	0.006158	0.004769	0.003694
5.55	0.004578	0.003497	0.002671	0.00448	0.003375	0.002543	0.004677	0.003622	0.002805	0.004096	0.003129	0.00239	0.004008	0.00302	0.002275	0.004185	0.003241	0.00251	0.00506	0.003865	0.002952	0.004952	0.00373	0.00281	0.00517	0.004004	0.003101
5.65	0.003879	0.002963	0.002263	0.003831	0.002886	0.002174	0.003926	0.003041	0.002355	0.003471	0.002651	0.002025	0.003427	0.002582	0.001945	0.003513	0.002721	0.002107	0.004287	0.003275	0.002501	0.004234	0.00319	0.002403	0.00434	0.003361	0.002603
5.75	0.003286	0.00251	0.001917	0.003276	0.002468	0.001859	0.003296	0.002553	0.001977	0.00294	0.002246	0.001716	0.002931	0.002208	0.001663	0.002949	0.002284	0.001769	0.003632	0.002774	0.002119	0.00362	0.002727	0.002055	0.003643	0.002821	0.002185
5.85	0.002784	0.002127	0.001624	0.002801	0.00211	0.00159	0.002767	0.002143	0.00166	0.002491	0.001903	0.001453	0.002506	0.001888	0.001422	0.002476	0.001917	0.001485	0.003077	0.002351	0.001795	0.003096	0.002332	0.001757	0.003058	0.002368	0.001834
5.95	0.002359	0.001802	0.001376	0.002395	0.001804	0.001359	0.002323	0.001799	0.001393	0.002111	0.001612	0.001231	0.002143	0.001614	0.001216	0.002078	0.00161	0.001247	0.002607	0.001991	0.001521	0.002647	0.001994	0.001502	0.002567	0.001988	0.00154
6.05	0.001999	0.001527	0.001166	0.002048	0.001543	0.001162	0.00195	0.00151	0.001169	0.001788	0.001366	0.001043	0.001832	0.00138	0.00104	0.001745	0.001351	0.001046	0.002209	0.001687	0.001289	0.002263	0.001705	0.001285	0.002155	0.001669	0.001293
6.15	0.001693	0.001293	0.0009879	0.001751	0.001319	0.0009938	0.001637	0.001268	0.0009817	0.001515	0.001157	0.0008839	0.001567	0.00118	0.0008892	0.001465	0.001134	0.0008784	0.001871	0.001429	0.001092	0.001935	0.001458	0.001098	0.001809	0.001401	0.001085
6.25	0.001435	0.001096	0.000837	0.001497	0.001128	0.0008497	0.001374	0.001064	0.0008241	0.001284	0.0009804	0.0007489	0.00134	0.001009	0.0007603	0.001229	0.0009521	0.0007374	0.001586	0.001211	0.0009251	0.001655	0.001247	0.0009392	0.001519	0.001176	0.0009109
6.35	0.001215	0.0009283	0.0007091	0.00128	0.0009645	0.0007266	0.001153	0.0008933	0.0006918	0.001087	0.0008306	0.0006345	0.001145	0.0008629	0.0006501	0.001032	0.0007993	0.000619	0.001343	0.001026	0.0007837	0.001415	0.001066	0.0008031	0.001275	0.0009873	0.0007647
6.45	0.00103	0.0007865	0.0006008	0.001095	0.0008247	0.0006213	0.0009683	0.0007499	0.0005808	0.0009213	0.0007037	0.0005375	0.0009794	0.0007379	0.0005559	0.0008663	0.000671	0.0005196	0.001138	0.0008693	0.000664	0.00121	0.0009115	0.0006867	0.00107	0.0008288	0.0006419
6.55	0.0008724	0.0006664	0.000509	0.000936	0.0007052	0.0005312	0.0008128	0.0006295	0.0004875	0.0007805	0.0005962	0.0004554	0.0008375	0.0006309	0.0004753	0.0007273	0.0005632	0.0004362	0.0009642	0.0007365	0.0005626	0.001035	0.0007794	0.0005871	0.0008984	0.0006958	0.0005388
6.65	0.0007391	0.0005646	0.0004312	0.0008004	0.000603	0.0004542	0.0006823	0.0005284	0.0004093	0.0006613	0.0005051	0.0003858	0.0007161	0.0005395	0.0004064	0.0006105	0.0004728	0.0003662	0.0008169	0.000624	0.0004766	0.0008846	0.0006664	0.0005021	0.0007542	0.0005841	0.0004523
6.75	0.001967	0.0004783	0.0003653	0.001992	0.0005156	0.0003884	0.001945	0.0004436	0.0003436	0.00176	0.000428	0.0003269	0.001782	0.0004613	0.0003475	0.00174	0.0003969	0.0003074	0.002174	0.0005287	0.0004038	0.002201	0.0005698	0.0004293	0.00215	0.0004903	0.0003797
6.85	0.003283	0.0004052	0.0003095	0.003272	0.0004408	0.0003321	0.003292	0.0003724	0.0002884	0.002937	0.0003626	0.0002769	0.002928	0.0003944	0.0002972	0.002945	0.0003332	0.000258	0.003628	0.0004479	0.0003421	0.003617	0.0004872	0.0003671	0.003638	0.0004116	0.0003188
6.95	0.003283	0.001955	0.0002622	0.003272	0.001949	0.000284	0.003292	0.001961	0.0002421	0.002937	0.001749	0.0002346	0.002928	0.001744	0.0002541	0.002945	0.001754	0.0002166	0.003628	0.002161	0.0002898	0.003617	0.002154	0.0003139	0.003638	0.002167	0.0002676
7.05	0.003283	0.001955	0.000698	0.003272	0.001949	0.0007067	0.003292	0.001961	0.0006901	0.002937	0.001749	0.0006246	0.002928	0.001744	0.0006323	0.002945	0.001754	0.0006174	0.003628	0.002161	0.0007715	0.003617	0.002154	0.0007811	0.003638	0.002167	0.0007627
7.15	0.003283	0.001955	0.001165	0.003272	0.001949	0.001161	0.003292	0.001961	0.001168	0.002937	0.001749	0.001042	0.002928	0.001744	0.001039	0.002945	0.001754	0.001045	0.003628	0.002161	0.001287	0.003617	0.002154	0.001283	0.003638	0.002167	0.001291
7.25	0.001641	0.001955	0.001165	0.001636	0.001949	0.001161	0.001646	0.001961	0.001168	0.001468	0.001749	0.001042	0.001464	0.001744	0.001039	0.001473	0.001754	0.001045	0.001814	0.002161	0.001287	0.001808	0.002154	0.001283	0.001819	0.002167	0.001291
7.35	0	0.001955	0.001165	0	0.001949	0.001161	0	0.001961	0.001168	0	0.001749	0.001042	0	0.001744	0.001039	0	0.001754	0.001045	0	0.002161	0.001287	0	0.002154	0.001283	0	0.002167	0.001291
7.45	0	0	0.001165	0	0	0.001161	0	0	0.001168	0	0	0.001042	0	0	0.001039	0	0	0.001045	0	0	0.001287	0	0	0.001283	0	0	0.001291
7.55	0	0	0.0005823	0	0	0.0005805	0	0	0.000584	0	0	0.000521	0	0	0.0005194	0	0	0.0005225	0	0	0.0006436	0	0	0.0006416	0	0	0.0006455
Sapanca_Akyazi+Karadere			Weights /Earthquake Rates
Magnitude	0.0375	0.075	0.0375	0.0375	0.075	0.0375	0.05	0.1	0.05	0.01875	0.0375	0.01875	0.01875	0.0375	0.01875	0.025	0.05	0.025	0.01875	0.0375	0.01875	0.01875	0.0375	0.01875	0.025	0.05	0.025
4.05	0.04442	0.03393	0.02592	0.038	0.02863	0.02157	0.05192	0.04021	0.03114	0.05016	0.03831	0.02926	0.0429	0.03232	0.02435	0.05862	0.0454	0.03516	0.03869	0.02955	0.02257	0.0331	0.02493	0.01878	0.04522	0.03502	0.02712
4.15	0.03764	0.02875	0.02196	0.03249	0.02448	0.01844	0.04358	0.03375	0.02614	0.04249	0.03246	0.02479	0.03669	0.02764	0.02082	0.04921	0.03811	0.02951	0.03278	0.02504	0.01913	0.0283	0.02132	0.01606	0.03796	0.0294	0.02277
4.25	0.03189	0.02436	0.0186	0.02778	0.02093	0.01577	0.03659	0.02833	0.02194	0.036	0.0275	0.02101	0.03137	0.02363	0.0178	0.04131	0.03199	0.02478	0.02777	0.02121	0.0162	0.0242	0.01823	0.01373	0.03187	0.02468	0.01911
4.35	0.02702	0.02064	0.01576	0.02376	0.0179	0.01348	0.03071	0.02379	0.01842	0.0305	0.0233	0.0178	0.02682	0.02021	0.01522	0.03468	0.02685	0.0208	0.02353	0.01797	0.01373	0.02069	0.01559	0.01174	0.02675	0.02072	0.01604
4.45	0.02289	0.01748	0.01335	0.02031	0.0153	0.01153	0.02578	0.01997	0.01546	0.02584	0.01974	0.01508	0.02294	0.01728	0.01302	0.02911	0.02254	0.01746	0.01994	0.01523	0.01163	0.01769	0.01333	0.01004	0.02246	0.01739	0.01347
4.55	0.01939	0.01481	0.01131	0.01737	0.01309	0.009858	0.02164	0.01676	0.01298	0.02189	0.01672	0.01277	0.01961	0.01477	0.01113	0.02444	0.01892	0.01466	0.01689	0.0129	0.009854	0.01513	0.0114	0.008586	0.01885	0.0146	0.01131
4.65	0.01643	0.01255	0.009586	0.01485	0.01119	0.008429	0.01817	0.01407	0.0109	0.01855	0.01417	0.01082	0.01677	0.01263	0.009517	0.02051	0.01589	0.0123	0.01431	0.01093	0.008349	0.01294	0.009745	0.007342	0.01582	0.01226	0.009491
4.75	0.01392	0.01063	0.008121	0.0127	0.009567	0.007208	0.01525	0.01181	0.009148	0.01572	0.012	0.009169	0.01434	0.0108	0.008138	0.01722	0.01334	0.01033	0.01212	0.00926	0.007073	0.01106	0.008333	0.006278	0.01328	0.01029	0.007967
4.85	0.01179	0.009008	0.006881	0.01086	0.008181	0.006163	0.0128	0.009915	0.007679	0.01331	0.01017	0.007768	0.01226	0.009236	0.006958	0.01446	0.01119	0.00867	0.01027	0.007846	0.005993	0.009458	0.007125	0.005368	0.01115	0.008636	0.006688
4.95	0.009991	0.007632	0.005829	0.009285	0.006995	0.00527	0.01075	0.008324	0.006446	0.01128	0.008616	0.006582	0.01048	0.007898	0.00595	0.01213	0.009398	0.007278	0.008702	0.006647	0.005077	0.008087	0.006093	0.00459	0.009361	0.00725	0.005615
5.05	0.008465	0.006466	0.004939	0.00794	0.005981	0.004506	0.009022	0.006987	0.005411	0.009557	0.0073	0.005576	0.008964	0.006753	0.005088	0.01019	0.007889	0.00611	0.007373	0.005631	0.004302	0.006915	0.00521	0.003925	0.007858	0.006086	0.004713
5.15	0.007172	0.005478	0.004184	0.006789	0.005114	0.003853	0.007574	0.005866	0.004543	0.008097	0.006185	0.004724	0.007665	0.005774	0.00435	0.008551	0.006622	0.005129	0.006246	0.004771	0.003644	0.005913	0.004455	0.003356	0.006597	0.005109	0.003957
5.25	0.006076	0.004641	0.003545	0.005805	0.004373	0.003295	0.006358	0.004924	0.003813	0.00686	0.00524	0.004002	0.006554	0.004937	0.00372	0.007178	0.005559	0.004305	0.005292	0.004042	0.003088	0.005056	0.003809	0.002869	0.005538	0.004289	0.003321
5.35	0.005148	0.003932	0.003003	0.004964	0.003739	0.002817	0.005337	0.004133	0.003201	0.005812	0.004439	0.003391	0.005604	0.004222	0.003181	0.006026	0.004667	0.003614	0.004484	0.003425	0.002616	0.004323	0.003257	0.002454	0.004649	0.0036	0.002788
5.45	0.004361	0.003331	0.002545	0.004244	0.003197	0.002409	0.00448	0.00347	0.002687	0.004924	0.003761	0.002873	0.004792	0.00361	0.00272	0.005058	0.003918	0.003034	0.003799	0.002902	0.002216	0.003697	0.002785	0.002098	0.003902	0.003022	0.002341
5.55	0.003695	0.002822	0.002156	0.003629	0.002734	0.00206	0.003761	0.002913	0.002256	0.004172	0.003187	0.002434	0.004097	0.003087	0.002325	0.004246	0.003289	0.002547	0.003218	0.002458	0.001878	0.003161	0.002381	0.001794	0.003276	0.002537	0.001965
5.65	0.003131	0.002391	0.001827	0.003103	0.002338	0.001761	0.003157	0.002445	0.001894	0.003534	0.0027	0.002062	0.003504	0.002639	0.001988	0.003565	0.002761	0.002138	0.002727	0.002083	0.001591	0.002703	0.002036	0.001534	0.00275	0.00213	0.001649
5.75	0.002652	0.002026	0.001547	0.002653	0.001999	0.001506	0.00265	0.002053	0.00159	0.002995	0.002287	0.001747	0.002996	0.002257	0.0017	0.002992	0.002318	0.001795	0.00231	0.001765	0.001348	0.002311	0.001741	0.001312	0.002308	0.001788	0.001385
5.85	0.002247	0.001716	0.001311	0.002269	0.001709	0.001288	0.002225	0.001723	0.001334	0.002537	0.001938	0.00148	0.002562	0.00193	0.001454	0.002512	0.001945	0.001507	0.001957	0.001495	0.001142	0.001976	0.001489	0.001122	0.001938	0.001501	0.001162
5.95	0.001904	0.001454	0.001111	0.00194	0.001461	0.001101	0.001868	0.001446	0.00112	0.002149	0.001642	0.001254	0.00219	0.00165	0.001243	0.002109	0.001633	0.001265	0.001658	0.001267	0.0009674	0.00169	0.001273	0.000959	0.001627	0.00126	0.0009757
6.05	0.001613	0.001232	0.0009411	0.001659	0.00125	0.0009415	0.001568	0.001214	0.0009404	0.001821	0.001391	0.001062	0.001873	0.001411	0.001063	0.00177	0.001371	0.001062	0.001405	0.001073	0.0008196	0.001445	0.001088	0.00082	0.001366	0.001058	0.0008191
6.15	0.001367	0.001044	0.0007973	0.001418	0.001069	0.000805	0.001316	0.001019	0.0007894	0.001543	0.001178	0.0009002	0.001601	0.001206	0.0009089	0.001486	0.001151	0.0008913	0.00119	0.0009091	0.0006944	0.001235	0.0009307	0.0007011	0.001146	0.0008878	0.0006876
6.25	0.001158	0.0008843	0.0006755	0.001213	0.0009137	0.0006883	0.001105	0.0008557	0.0006627	0.001307	0.0009985	0.0007627	0.001369	0.001032	0.0007771	0.001247	0.0009661	0.0007482	0.001008	0.0007702	0.0005883	0.001056	0.0007958	0.0005995	0.0009623	0.0007453	0.0005772
6.35	0.0009809	0.0007492	0.0005723	0.001037	0.0007813	0.0005886	0.0009275	0.0007183	0.0005563	0.001107	0.0008459	0.0006461	0.001171	0.0008821	0.0006645	0.001047	0.000811	0.0006281	0.0008543	0.0006526	0.0004985	0.0009032	0.0006805	0.0005126	0.0008078	0.0006256	0.0004845
6.45	0.000831	0.0006348	0.0004849	0.0008867	0.000668	0.0005033	0.0007786	0.000603	0.000467	0.0009383	0.0007167	0.0005474	0.001001	0.0007542	0.0005682	0.0008791	0.0006808	0.0005273	0.0007238	0.0005529	0.0004223	0.0007723	0.0005818	0.0004383	0.0006781	0.0005252	0.0004067
6.55	0.0007041	0.0005378	0.0004108	0.0007582	0.0005712	0.0004303	0.0006536	0.0005062	0.000392	0.0007949	0.0006072	0.0004638	0.0008561	0.0006449	0.0004859	0.0007379	0.0005715	0.0004426	0.0006132	0.0004684	0.0003578	0.0006604	0.0004975	0.0003748	0.0005693	0.0004409	0.0003414
6.65	0.0005965	0.0004556	0.000348	0.0006483	0.0004884	0.000368	0.0005487	0.0004249	0.0003291	0.0006735	0.0005144	0.0003929	0.000732	0.0005514	0.0004154	0.0006195	0.0004798	0.0003716	0.0005195	0.0003968	0.0003031	0.0005647	0.0004254	0.0003205	0.0004779	0.0003701	0.0002866
6.75	0.002602	0.000386	0.0002949	0.002599	0.0004176	0.0003146	0.002605	0.0003567	0.0002763	0.002938	0.0004358	0.0003329	0.002935	0.0004715	0.0003552	0.002941	0.0004027	0.0003119	0.002266	0.0003362	0.0002568	0.002264	0.0003637	0.000274	0.002269	0.0003107	0.0002406
6.85	0.002831	0.0008772	0.0002498	0.002822	0.0008933	0.000269	0.002839	0.0008623	0.0002319	0.003196	0.0009904	0.0002821	0.003186	0.001009	0.0003037	0.003205	0.0009736	0.0002618	0.002466	0.000764	0.0002176	0.002458	0.000778	0.0002343	0.002473	0.0007511	0.000202
6.95	0.002831	0.001686	0.0002117	0.002822	0.001681	0.00023	0.002839	0.001691	0.0001947	0.003196	0.001904	0.000239	0.003186	0.001898	0.0002597	0.003205	0.001909	0.0002198	0.002466	0.001469	0.0001843	0.002458	0.001464	0.0002004	0.002473	0.001473	0.0001696
7.05	0.002831	0.001686	0.0009233	0.002822	0.001681	0.0009222	0.002839	0.001691	0.0009242	0.003196	0.001904	0.001042	0.003186	0.001898	0.001041	0.003205	0.001909	0.001043	0.002466	0.001469	0.0008042	0.002458	0.001464	0.0008032	0.002473	0.001473	0.000805
7.15	0.002831	0.001686	0.001004	0.002822	0.001681	0.001001	0.002839	0.001691	0.001007	0.003196	0.001904	0.001134	0.003186	0.001898	0.00113	0.003205	0.001909	0.001137	0.002466	0.001469	0.0008748	0.002458	0.001464	0.0008721	0.002473	0.001473	0.0008773
7.25	0.0002831	0.001686	0.001004	0.0002822	0.001681	0.001001	0.0002839	0.001691	0.001007	0.0003196	0.001904	0.001134	0.0003186	0.001898	0.00113	0.0003205	0.001909	0.001137	0.0002466	0.001469	0.0008748	0.0002458	0.001464	0.0008721	0.0002473	0.001473	0.0008773
7.35	0	0.001012	0.001004	0	0.001009	0.001001	0	0.001015	0.001007	0	0.001142	0.001134	0	0.001139	0.00113	0	0.001146	0.001137	0	0.0008812	0.0008748	0	0.0008784	0.0008721	0	0.0008837	0.0008773
7.45	0	0	0.001004	0	0	0.001001	0	0	0.001007	0	0	0.001134	0	0	0.00113	0	0	0.001137	0	0	0.0008748	0	0	0.0008721	0	0	0.0008773
7.55	0	0	0.0001004	0	0	0.0001001	0	0	0.0001007	0	0	0.0001134	0	0	0.000113	0	0	0.0001137	0	0	8.749e-05	0	0	8.721e-05	0	0	8.773e-05
Segments 3+2_1+2_2		Weights /Earthquake Rates
Magnitude	0.0375	0.075	0.0375	0.0375	0.075	0.0375	0.05	0.1	0.05	0.01875	0.0375	0.01875	0.01875	0.0375	0.01875	0.025	0.05	0.025	0.01875	0.0375	0.01875	0.01875	0.0375	0.01875	0.025	0.05	0.025
4.05	0.06395	0.04885	0.03731	0.05322	0.04009	0.0302	0.07683	0.0595	0.04608	0.07016	0.05359	0.04094	0.05838	0.04398	0.03313	0.08429	0.06528	0.05056	0.05774	0.04411	0.03369	0.04805	0.0362	0.02727	0.06937	0.05373	0.04161
4.15	0.05418	0.04139	0.03161	0.0455	0.03428	0.02582	0.0645	0.04995	0.03869	0.05944	0.0454	0.03468	0.04992	0.03761	0.02833	0.07076	0.0548	0.04244	0.04892	0.03737	0.02854	0.04108	0.03095	0.02332	0.05824	0.0451	0.03493
4.25	0.0459	0.03506	0.02678	0.03891	0.02931	0.02208	0.05414	0.04193	0.03248	0.05036	0.03847	0.02938	0.04269	0.03216	0.02423	0.0594	0.046	0.03563	0.04145	0.03166	0.02418	0.03513	0.02647	0.01994	0.04889	0.03786	0.02932
4.35	0.03889	0.02971	0.02269	0.03327	0.02506	0.01888	0.04545	0.0352	0.02726	0.04267	0.03259	0.02489	0.0365	0.0275	0.02071	0.04986	0.03862	0.02991	0.03512	0.02682	0.02049	0.03004	0.02263	0.01705	0.04104	0.03178	0.02461
4.45	0.03295	0.02517	0.01922	0.02845	0.02143	0.01614	0.03815	0.02955	0.02288	0.03615	0.02761	0.02109	0.03121	0.02351	0.01771	0.04186	0.03242	0.02511	0.02975	0.02273	0.01736	0.02569	0.01935	0.01458	0.03445	0.02668	0.02066
4.55	0.02792	0.02132	0.01629	0.02432	0.01832	0.0138	0.03203	0.02481	0.01921	0.03063	0.02339	0.01787	0.02669	0.0201	0.01515	0.03514	0.02721	0.02108	0.02521	0.01925	0.01471	0.02196	0.01655	0.01246	0.02892	0.0224	0.01735
4.65	0.02365	0.01807	0.0138	0.0208	0.01567	0.0118	0.02689	0.02082	0.01613	0.02595	0.01982	0.01514	0.02282	0.01719	0.01295	0.0295	0.02285	0.01769	0.02136	0.01631	0.01246	0.01878	0.01415	0.01066	0.02428	0.0188	0.01456
4.75	0.02004	0.01531	0.01169	0.01778	0.0134	0.01009	0.02257	0.01748	0.01354	0.02198	0.01679	0.01283	0.01951	0.0147	0.01107	0.02476	0.01918	0.01485	0.01809	0.01382	0.01056	0.01606	0.0121	0.009113	0.02038	0.01578	0.01222
4.85	0.01698	0.01297	0.009905	0.01521	0.01146	0.00863	0.01895	0.01467	0.01136	0.01863	0.01423	0.01087	0.01668	0.01257	0.009468	0.02079	0.0161	0.01247	0.01533	0.01171	0.008943	0.01373	0.01034	0.007793	0.01711	0.01325	0.01026
4.95	0.01438	0.01099	0.008392	0.013	0.009796	0.00738	0.01591	0.01232	0.00954	0.01578	0.01205	0.009207	0.01427	0.01075	0.008096	0.01745	0.01351	0.01047	0.01299	0.00992	0.007577	0.01174	0.008845	0.006663	0.01436	0.01112	0.008614
5.05	0.01219	0.009308	0.00711	0.01112	0.008376	0.00631	0.01335	0.01034	0.008008	0.01337	0.01021	0.0078	0.0122	0.009189	0.006923	0.01465	0.01134	0.008786	0.011	0.008404	0.00642	0.01004	0.007563	0.005697	0.01206	0.009337	0.007231
5.15	0.01032	0.007886	0.006024	0.009507	0.007162	0.005396	0.01121	0.008681	0.006723	0.01133	0.008652	0.006608	0.01043	0.007857	0.005919	0.0123	0.009523	0.007376	0.009322	0.00712	0.005439	0.008584	0.006467	0.004872	0.01012	0.007838	0.00607
5.25	0.008747	0.006681	0.005103	0.008129	0.006124	0.004614	0.009409	0.007287	0.005644	0.009596	0.00733	0.005599	0.008918	0.006719	0.005061	0.01032	0.007995	0.006191	0.007898	0.006033	0.004608	0.00734	0.005529	0.004166	0.008496	0.00658	0.005096
5.35	0.007411	0.005661	0.004324	0.006951	0.005236	0.003945	0.007899	0.006117	0.004738	0.00813	0.00621	0.004744	0.007626	0.005745	0.004328	0.008665	0.006711	0.005197	0.006691	0.005111	0.003904	0.006276	0.004728	0.003562	0.007132	0.005523	0.004278
5.45	0.006279	0.004796	0.003663	0.005943	0.004478	0.003373	0.006631	0.005135	0.003977	0.006888	0.005261	0.004019	0.00652	0.004912	0.003701	0.007274	0.005634	0.004363	0.005669	0.00433	0.003308	0.005366	0.004043	0.003046	0.005987	0.004637	0.003591
5.55	0.005319	0.004063	0.003104	0.005082	0.003829	0.002884	0.005566	0.004311	0.003338	0.005836	0.004458	0.003405	0.005575	0.0042	0.003164	0.006106	0.004729	0.003663	0.004803	0.003669	0.002802	0.004589	0.003457	0.002604	0.005026	0.003892	0.003014
5.65	0.004507	0.003442	0.002629	0.004345	0.003274	0.002466	0.004673	0.003619	0.002803	0.004944	0.003777	0.002885	0.004767	0.003592	0.002706	0.005126	0.00397	0.003075	0.004069	0.003108	0.002374	0.003924	0.002956	0.002227	0.004219	0.003267	0.00253
5.75	0.003818	0.002916	0.002228	0.003716	0.002799	0.002109	0.003922	0.003038	0.002353	0.004189	0.0032	0.002444	0.004076	0.003071	0.002314	0.004303	0.003333	0.002581	0.003447	0.002633	0.002011	0.003355	0.002527	0.001904	0.003542	0.002743	0.002124
5.85	0.003235	0.002471	0.001887	0.003177	0.002394	0.001803	0.003293	0.00255	0.001975	0.003549	0.002711	0.002071	0.003486	0.002626	0.001978	0.003612	0.002798	0.002167	0.002921	0.002231	0.001704	0.002869	0.002161	0.001628	0.002973	0.002302	0.001783
5.95	0.002741	0.002093	0.001599	0.002717	0.002047	0.001542	0.002764	0.002141	0.001658	0.003007	0.002297	0.001754	0.00298	0.002245	0.001692	0.003032	0.002349	0.001819	0.002475	0.00189	0.001444	0.002453	0.001848	0.001392	0.002496	0.001933	0.001497
6.05	0.002322	0.001774	0.001355	0.002323	0.00175	0.001318	0.00232	0.001797	0.001392	0.002547	0.001946	0.001486	0.002548	0.00192	0.001446	0.002546	0.001971	0.001527	0.002097	0.001601	0.001223	0.002097	0.00158	0.00119	0.002095	0.001623	0.001257
6.15	0.001967	0.001503	0.001148	0.001986	0.001496	0.001127	0.001948	0.001509	0.001168	0.002158	0.001649	0.001259	0.002179	0.001642	0.001237	0.002137	0.001655	0.001282	0.001776	0.001357	0.001036	0.001793	0.001351	0.001018	0.001759	0.001362	0.001055
6.25	0.001667	0.001273	0.0009724	0.001698	0.001279	0.0009639	0.001635	0.001266	0.0009807	0.001829	0.001397	0.001067	0.001863	0.001404	0.001057	0.001794	0.001389	0.001076	0.001505	0.001149	0.000878	0.001533	0.001155	0.0008703	0.001476	0.001143	0.0008855
6.35	0.001412	0.001079	0.0008239	0.001452	0.001094	0.0008242	0.001373	0.001063	0.0008233	0.001549	0.001183	0.0009039	0.001593	0.0012	0.0009042	0.001506	0.001166	0.0009032	0.001275	0.0009739	0.0007439	0.001311	0.0009878	0.0007442	0.001239	0.0009598	0.0007434
6.45	0.001196	0.0009138	0.000698	0.001242	0.0009355	0.0007048	0.001152	0.0008924	0.0006911	0.001312	0.001003	0.0007658	0.001362	0.001026	0.0007732	0.001264	0.000979	0.0007582	0.00108	0.0008251	0.0006302	0.001121	0.0008447	0.0006363	0.00104	0.0008057	0.000624
6.55	0.001014	0.0007742	0.0005914	0.001062	0.0007999	0.0006026	0.0009673	0.0007491	0.0005802	0.001112	0.0008494	0.0006488	0.001165	0.0008776	0.0006611	0.001061	0.0008218	0.0006365	0.0009152	0.000699	0.000534	0.0009587	0.0007222	0.0005441	0.0008734	0.0006764	0.0005238
6.65	0.0008587	0.0006559	0.000501	0.0009079	0.000684	0.0005153	0.000812	0.0006289	0.000487	0.0009421	0.0007196	0.0005497	0.000996	0.0007504	0.0005653	0.0008908	0.0006899	0.0005343	0.0007754	0.0005922	0.0004524	0.0008197	0.0006176	0.0004652	0.0007332	0.0005678	0.0004397
6.75	0.0007275	0.0005557	0.0004245	0.0007763	0.0005848	0.0004406	0.0006816	0.0005279	0.0004088	0.0007982	0.0006097	0.0004657	0.0008517	0.0006416	0.0004834	0.0007478	0.0005792	0.0004485	0.0006569	0.0005018	0.0003833	0.0007009	0.0005281	0.0003978	0.0006155	0.0004766	0.0003691
6.85	0.0006164	0.0004708	0.0003596	0.0006638	0.0005001	0.0003767	0.0005722	0.0004432	0.0003432	0.0006762	0.0005165	0.0003945	0.0007282	0.0005486	0.0004133	0.0006278	0.0004862	0.0003765	0.0005565	0.0004251	0.0003247	0.0005994	0.0004515	0.0003402	0.0005166	0.0004001	0.0003099
6.95	0.0005222	0.0003989	0.0003047	0.0005676	0.0004276	0.0003221	0.0004803	0.000372	0.0002881	0.0005729	0.0004376	0.0003343	0.0006227	0.0004691	0.0003534	0.000527	0.0004081	0.0003161	0.0004715	0.0003602	0.0002751	0.0005125	0.0003861	0.0002909	0.0004337	0.0003359	0.0002601
7.05	0.002278	0.000338	0.0002581	0.002276	0.0003656	0.0002754	0.00228	0.0003123	0.0002419	0.002499	0.0003708	0.0002832	0.002496	0.0004011	0.0003022	0.002502	0.0003426	0.0002653	0.002057	0.0003051	0.0002331	0.002055	0.0003301	0.0002487	0.002059	0.000282	0.0002184
7.15	0.002478	0.000768	0.0002187	0.002471	0.0007821	0.0002355	0.002485	0.0007549	0.000203	0.002719	0.0008425	0.0002399	0.00271	0.000858	0.0002584	0.002727	0.0008282	0.0002227	0.002238	0.0006934	0.0001975	0.002231	0.0007061	0.0002127	0.002244	0.0006817	0.0001833
7.25	0.002478	0.001476	0.0001853	0.002471	0.001472	0.0002014	0.002485	0.00148	0.0001704	0.002719	0.00162	0.0002033	0.00271	0.001614	0.0002209	0.002727	0.001624	0.000187	0.002238	0.001333	0.0001673	0.002231	0.001329	0.0001818	0.002244	0.001337	0.0001539
7.35	0.002478	0.001476	0.0008083	0.002471	0.001472	0.0008074	0.002485	0.00148	0.0008091	0.002719	0.00162	0.0008868	0.00271	0.001614	0.0008858	0.002727	0.001624	0.0008877	0.002238	0.001333	0.0007298	0.002231	0.001329	0.000729	0.002244	0.001337	0.0007306
7.45	0.002478	0.001476	0.0008793	0.002471	0.001472	0.0008766	0.002485	0.00148	0.0008819	0.002719	0.00162	0.0009647	0.00271	0.001614	0.0009617	0.002727	0.001624	0.0009675	0.002238	0.001333	0.000794	0.002231	0.001329	0.0007915	0.002244	0.001337	0.0007962
7.55	0.0002478	0.001476	0.0008793	0.0002471	0.001472	0.0008766	0.0002485	0.00148	0.0008819	0.0002719	0.00162	0.0009647	0.000271	0.001614	0.0009617	0.0002727	0.001624	0.0009675	0.0002238	0.001333	0.000794	0.0002231	0.001329	0.0007915	0.0002244	0.001337	0.0007962
7.65	0	0.0008857	0.0008793	0	0.000883	0.0008766	0	0.0008883	0.0008819	0	0.0009717	0.0009647	0	0.0009687	0.0009617	0	0.0009745	0.0009675	0	0.0007998	0.000794	0	0.0007972	0.0007915	0	0.000802	0.0007962
7.75	0	0	0.0008793	0	0	0.0008766	0	0	0.0008819	0	0	0.0009647	0	0	0.0009617	0	0	0.0009675	0	0	0.000794	0	0	0.0007915	0	0	0.0007962
7.85	0	0	8.794e-05	0	0	8.766e-05	0	0	8.819e-05	0	0	9.647e-05	0	0	9.617e-05	0	0	9.675e-05	0	0	7.94e-05	0	0	7.915e-05	0	0	7.963e-05
Segments 2_1+2_2+2_3		Weights /Earthquake Rates
Magnitude	0.0375	0.075	0.0375	0.0375	0.075	0.0375	0.05	0.1	0.05	0.01875	0.0375	0.01875	0.01875	0.0375	0.01875	0.025	0.05	0.025	0.01875	0.0375	0.01875	0.01875	0.0375	0.01875	0.025	0.05	0.025
4.05	0.05808	0.04437	0.03389	0.04824	0.03634	0.02738	0.06991	0.05414	0.04193	0.05197	0.0397	0.03032	0.04316	0.03252	0.0245	0.06255	0.04844	0.03752	0.0642	0.04904	0.03745	0.05332	0.04017	0.03026	0.07727	0.05984	0.04634
4.15	0.04921	0.03759	0.02871	0.04125	0.03108	0.02341	0.05869	0.04545	0.0352	0.04403	0.03363	0.02569	0.03691	0.0278	0.02095	0.05251	0.04067	0.03149	0.05439	0.04154	0.03173	0.04559	0.03435	0.02588	0.06486	0.05023	0.0389
4.25	0.04169	0.03184	0.02432	0.03527	0.02657	0.02002	0.04926	0.03815	0.02955	0.0373	0.02849	0.02176	0.03156	0.02377	0.01791	0.04408	0.03414	0.02644	0.04608	0.0352	0.02688	0.03898	0.02937	0.02213	0.05445	0.04217	0.03266
4.35	0.03532	0.02698	0.02061	0.03016	0.02272	0.01712	0.04136	0.03203	0.0248	0.0316	0.02414	0.01844	0.02698	0.02033	0.01531	0.037	0.02866	0.02219	0.03904	0.02982	0.02278	0.03333	0.02511	0.01892	0.04571	0.0354	0.02742
4.45	0.02993	0.02286	0.01746	0.02579	0.01943	0.01464	0.03472	0.02689	0.02082	0.02678	0.02045	0.01562	0.02307	0.01738	0.0131	0.03106	0.02406	0.01863	0.03308	0.02526	0.0193	0.0285	0.02147	0.01618	0.03837	0.02972	0.02301
4.55	0.02535	0.01937	0.01479	0.02205	0.01661	0.01251	0.02914	0.02257	0.01748	0.02268	0.01733	0.01324	0.01973	0.01486	0.0112	0.02608	0.02019	0.01564	0.02802	0.0214	0.01635	0.02437	0.01836	0.01383	0.03221	0.02495	0.01932
4.65	0.02148	0.01641	0.01253	0.01885	0.0142	0.0107	0.02446	0.01895	0.01467	0.01922	0.01468	0.01121	0.01687	0.01271	0.009574	0.02189	0.01695	0.01313	0.02374	0.01813	0.01385	0.02084	0.0157	0.01183	0.02704	0.02094	0.01622
4.75	0.0182	0.0139	0.01062	0.01612	0.01215	0.00915	0.02054	0.01591	0.01232	0.01628	0.01244	0.0095	0.01442	0.01087	0.008187	0.01838	0.01423	0.01102	0.02011	0.01536	0.01174	0.01782	0.01342	0.01011	0.0227	0.01758	0.01361
4.85	0.01542	0.01178	0.008996	0.01379	0.01039	0.007824	0.01724	0.01335	0.01034	0.0138	0.01054	0.008049	0.01233	0.009292	0.007	0.01543	0.01195	0.009252	0.01704	0.01302	0.009943	0.01524	0.01148	0.008647	0.01905	0.01476	0.01143
4.95	0.01306	0.009978	0.007622	0.01179	0.00888	0.00669	0.01447	0.01121	0.00868	0.01169	0.008928	0.006819	0.01055	0.007945	0.005986	0.01295	0.01003	0.007767	0.01444	0.01103	0.008424	0.01303	0.009815	0.007394	0.016	0.01239	0.009594
5.05	0.01107	0.008454	0.006457	0.01008	0.007593	0.00572	0.01215	0.009409	0.007287	0.009902	0.007564	0.005777	0.009018	0.006794	0.005118	0.01087	0.008418	0.00652	0.01223	0.009343	0.007137	0.01114	0.008392	0.006322	0.01343	0.0104	0.008054
5.15	0.009377	0.007162	0.005471	0.008618	0.006493	0.004891	0.0102	0.007898	0.006117	0.00839	0.006408	0.004895	0.007711	0.005809	0.004376	0.009125	0.007067	0.005473	0.01036	0.007916	0.006047	0.009525	0.007176	0.005406	0.01127	0.00873	0.006761
5.25	0.007944	0.006068	0.004635	0.007369	0.005552	0.004182	0.008561	0.00663	0.005135	0.007108	0.005429	0.004147	0.006593	0.004967	0.003742	0.00766	0.005932	0.004594	0.00878	0.006707	0.005123	0.008145	0.006136	0.004623	0.009462	0.007328	0.005675
5.35	0.00673	0.005141	0.003927	0.006301	0.004747	0.003576	0.007187	0.005566	0.004311	0.006022	0.0046	0.003513	0.005638	0.004247	0.0032	0.00643	0.00498	0.003857	0.007439	0.005682	0.00434	0.006964	0.005247	0.003953	0.007943	0.006152	0.004764
5.45	0.005702	0.004356	0.003327	0.005388	0.004059	0.003058	0.006033	0.004672	0.003619	0.005102	0.003897	0.002977	0.004821	0.003632	0.002736	0.005398	0.004181	0.003238	0.006302	0.004814	0.003677	0.005955	0.004486	0.00338	0.006668	0.005164	0.003999
5.55	0.004831	0.00369	0.002819	0.004607	0.003471	0.002615	0.005064	0.003922	0.003038	0.004323	0.003302	0.002522	0.004122	0.003105	0.002339	0.004531	0.003509	0.002718	0.00534	0.004079	0.003115	0.005092	0.003836	0.00289	0.005598	0.004335	0.003357
5.65	0.004093	0.003126	0.002388	0.003939	0.002968	0.002236	0.004251	0.003293	0.00255	0.003662	0.002797	0.002137	0.003525	0.002655	0.002	0.003804	0.002946	0.002282	0.004524	0.003455	0.002639	0.004354	0.00328	0.002471	0.004699	0.003639	0.002818
5.75	0.003468	0.002649	0.002023	0.003368	0.002538	0.001912	0.003569	0.002764	0.002141	0.003103	0.00237	0.00181	0.003014	0.00227	0.00171	0.003193	0.002473	0.001915	0.003833	0.002928	0.002236	0.003723	0.002805	0.002113	0.003945	0.003055	0.002366
5.85	0.002938	0.002244	0.001714	0.00288	0.00217	0.001635	0.002996	0.00232	0.001797	0.002629	0.002008	0.001534	0.002577	0.001941	0.001463	0.002681	0.002076	0.001608	0.003247	0.00248	0.001895	0.003183	0.002398	0.001807	0.003311	0.002564	0.001986
5.95	0.002489	0.001901	0.001452	0.002463	0.001855	0.001398	0.002515	0.001948	0.001508	0.002227	0.001701	0.001299	0.002204	0.00166	0.001251	0.00225	0.001743	0.00135	0.002751	0.002101	0.001605	0.002722	0.002051	0.001545	0.00278	0.002153	0.001667
6.05	0.002109	0.001611	0.00123	0.002106	0.001586	0.001195	0.002111	0.001635	0.001266	0.001887	0.001441	0.001101	0.001884	0.001419	0.001069	0.001889	0.001463	0.001133	0.002331	0.00178	0.00136	0.002327	0.001753	0.001321	0.002333	0.001807	0.0014
6.15	0.001787	0.001365	0.001042	0.001801	0.001356	0.001022	0.001772	0.001373	0.001063	0.001599	0.001221	0.0009327	0.001611	0.001214	0.0009144	0.001586	0.001228	0.0009511	0.001975	0.001508	0.001152	0.00199	0.001499	0.001129	0.001959	0.001517	0.001175
6.25	0.001514	0.001156	0.0008832	0.00154	0.00116	0.0008738	0.001488	0.001152	0.0008923	0.001354	0.001035	0.0007902	0.001378	0.001038	0.0007818	0.001331	0.001031	0.0007984	0.001673	0.001278	0.0009761	0.001702	0.001282	0.0009658	0.001644	0.001274	0.0009863
6.35	0.001282	0.0009796	0.0007482	0.001316	0.0009918	0.0007472	0.001249	0.0009672	0.0007491	0.001147	0.0008765	0.0006695	0.001178	0.0008874	0.0006685	0.001117	0.0008654	0.0006702	0.001417	0.001083	0.000827	0.001455	0.001096	0.0008258	0.00138	0.001069	0.0008279
6.45	0.001087	0.0008299	0.0006339	0.001126	0.000848	0.0006389	0.001048	0.000812	0.0006288	0.0009722	0.0007426	0.0005672	0.001007	0.0007588	0.0005716	0.0009381	0.0007265	0.0005626	0.001201	0.0009173	0.0007007	0.001244	0.0009373	0.0007061	0.001159	0.0008974	0.000695
6.55	0.0009205	0.0007031	0.0005371	0.0009625	0.0007251	0.0005463	0.0008801	0.0006816	0.0005279	0.0008236	0.0006291	0.0004805	0.0008612	0.0006488	0.0004888	0.0007875	0.0006099	0.0004723	0.001017	0.0007772	0.0005936	0.001064	0.0008015	0.0006038	0.0009727	0.0007534	0.0005834
6.65	0.0007799	0.0005957	0.000455	0.000823	0.00062	0.0004671	0.0007388	0.0005722	0.0004431	0.0006978	0.000533	0.0004071	0.0007364	0.0005548	0.0004179	0.000661	0.000512	0.0003965	0.000862	0.0006584	0.0005029	0.0009097	0.0006853	0.0005163	0.0008166	0.0006324	0.0004898
6.75	0.0006608	0.0005047	0.0003855	0.0007037	0.0005302	0.0003994	0.0006202	0.0004803	0.000372	0.0005912	0.0004516	0.0003449	0.0006297	0.0004744	0.0003574	0.0005549	0.0004298	0.0003328	0.0007303	0.0005578	0.0004261	0.0007778	0.000586	0.0004415	0.0006855	0.0005309	0.0004111
6.85	0.0005598	0.0004276	0.0003266	0.0006018	0.0004533	0.0003415	0.0005206	0.0004032	0.0003123	0.0005009	0.0003826	0.0002922	0.0005384	0.0004056	0.0003056	0.0004658	0.0003608	0.0002794	0.0006187	0.0004726	0.000361	0.0006651	0.0005011	0.0003775	0.0005754	0.0004457	0.0003451
6.95	0.0004743	0.0003623	0.0002767	0.0005145	0.0003876	0.000292	0.0004371	0.0003385	0.0002621	0.0004244	0.0003241	0.0002476	0.0004604	0.0003468	0.0002613	0.000391	0.0003029	0.0002345	0.0005242	0.0004004	0.0003058	0.0005687	0.0004284	0.0003228	0.0004831	0.0003741	0.0002897
7.05	0.001652	0.0003069	0.0002344	0.001659	0.0003315	0.0002497	0.001645	0.0002841	0.0002201	0.001478	0.0002746	0.0002098	0.001484	0.0002966	0.0002234	0.001472	0.0002542	0.0001969	0.001826	0.0003392	0.0002591	0.001833	0.0003663	0.000276	0.001819	0.0003141	0.0002432
7.15	0.002177	0.0004708	0.0001986	0.002171	0.0004888	0.0002135	0.002184	0.0004542	0.0001847	0.001948	0.0004213	0.0001777	0.001942	0.0004374	0.000191	0.001954	0.0004064	0.0001653	0.002407	0.0005204	0.0002195	0.002399	0.0005403	0.000236	0.002413	0.0005021	0.0002042
7.25	0.002177	0.001297	0.0001683	0.002171	0.001293	0.0001826	0.002184	0.001301	0.0001551	0.001948	0.00116	0.0001506	0.001942	0.001157	0.0001633	0.001954	0.001164	0.0001387	0.002407	0.001434	0.000186	0.002399	0.001429	0.0002018	0.002413	0.001438	0.0001714
7.35	0.002177	0.001297	0.0005861	0.002171	0.001293	0.0005885	0.002184	0.001301	0.0005838	0.001948	0.00116	0.0005244	0.001942	0.001157	0.0005266	0.001954	0.001164	0.0005224	0.002407	0.001434	0.0006478	0.002399	0.001429	0.0006505	0.002413	0.001438	0.0006453
7.45	0.002177	0.001297	0.0007726	0.002171	0.001293	0.0007701	0.002184	0.001301	0.0007748	0.001948	0.00116	0.0006913	0.001942	0.001157	0.0006891	0.001954	0.001164	0.0006932	0.002407	0.001434	0.0008539	0.002399	0.001429	0.0008512	0.002413	0.001438	0.0008563
7.55	0.0006532	0.001297	0.0007726	0.0006512	0.001293	0.0007701	0.0006551	0.001301	0.0007748	0.0005845	0.00116	0.0006913	0.0005826	0.001157	0.0006891	0.0005861	0.001164	0.0006932	0.000722	0.001434	0.0008539	0.0007197	0.001429	0.0008512	0.000724	0.001438	0.0008563
7.65	0	0.001038	0.0007726	0	0.001034	0.0007701	0	0.001041	0.0007748	0	0.0009284	0.0006913	0	0.0009255	0.0006891	0	0.000931	0.0006932	0	0.001147	0.0008539	0	0.001143	0.0008512	0	0.00115	0.0008563
7.75	0	0	0.0007726	0	0	0.0007701	0	0	0.0007748	0	0	0.0006913	0	0	0.0006891	0	0	0.0006932	0	0	0.0008539	0	0	0.0008512	0	0	0.0008563
7.85	0	0	0.0002318	0	0	0.000231	0	0	0.0002324	0	0	0.0002074	0	0	0.0002067	0	0	0.000208	0	0	0.0002562	0	0	0.0002554	0	0	0.0002569
Segments 2_2+2_3+1		Weights /Earthquake Rates
Magnitude	0.0375	0.075	0.0375	0.0375	0.075	0.0375	0.05	0.1	0.05	0.01875	0.0375	0.01875	0.01875	0.0375	0.01875	0.025	0.05	0.025	0.01875	0.0375	0.01875	0.01875	0.0375	0.01875	0.025	0.05	0.025
4.05	0.04982	0.03806	0.02907	0.04188	0.03155	0.02377	0.05926	0.04589	0.03554	0.04382	0.03347	0.02557	0.03683	0.02775	0.02091	0.05212	0.04036	0.03126	0.05583	0.04264	0.03257	0.04693	0.03535	0.02663	0.06639	0.05142	0.03982
4.15	0.04221	0.03224	0.02463	0.03581	0.02698	0.02032	0.04974	0.03852	0.02983	0.03713	0.02836	0.02166	0.0315	0.02373	0.01788	0.04375	0.03388	0.02624	0.0473	0.03613	0.0276	0.04013	0.03023	0.02277	0.05574	0.04316	0.03343
4.25	0.03576	0.02732	0.02087	0.03062	0.02307	0.01738	0.04176	0.03234	0.02505	0.03145	0.02403	0.01835	0.02693	0.02029	0.01528	0.03673	0.02844	0.02203	0.04007	0.03061	0.02338	0.03431	0.02585	0.01947	0.04679	0.03624	0.02806
4.35	0.0303	0.02314	0.01768	0.02618	0.01972	0.01486	0.03505	0.02715	0.02102	0.02665	0.02036	0.01555	0.02303	0.01735	0.01307	0.03083	0.02388	0.01849	0.03395	0.02593	0.01981	0.02934	0.0221	0.01665	0.03928	0.03042	0.02356
4.45	0.02567	0.01961	0.01498	0.02239	0.01687	0.01271	0.02943	0.02279	0.01765	0.02258	0.01725	0.01317	0.01969	0.01483	0.01118	0.02588	0.02004	0.01552	0.02876	0.02197	0.01678	0.02509	0.0189	0.01424	0.03297	0.02553	0.01978
4.55	0.02175	0.01661	0.01269	0.01914	0.01442	0.01086	0.0247	0.01913	0.01482	0.01913	0.01461	0.01116	0.01684	0.01268	0.009556	0.02173	0.01683	0.01303	0.02437	0.01861	0.01422	0.02145	0.01616	0.01217	0.02768	0.02144	0.0166
4.65	0.01843	0.01407	0.01075	0.01637	0.01233	0.00929	0.02074	0.01606	0.01244	0.01621	0.01238	0.009455	0.0144	0.01085	0.008171	0.01824	0.01412	0.01094	0.02065	0.01577	0.01205	0.01834	0.01382	0.01041	0.02323	0.01799	0.01394
4.75	0.01561	0.01192	0.009108	0.014	0.01054	0.007943	0.01741	0.01348	0.01044	0.01373	0.01049	0.008011	0.01231	0.009274	0.006986	0.01531	0.01186	0.009183	0.01749	0.01336	0.01021	0.01568	0.01181	0.008901	0.0195	0.01511	0.0117
4.85	0.01323	0.0101	0.007717	0.01197	0.009016	0.006792	0.01461	0.01132	0.008764	0.01163	0.008885	0.006787	0.01053	0.00793	0.005974	0.01285	0.009953	0.007709	0.01482	0.01132	0.008646	0.01341	0.0101	0.007611	0.01637	0.01268	0.00982
4.95	0.01121	0.008559	0.006538	0.01023	0.007709	0.005808	0.01227	0.0095	0.007357	0.009855	0.007528	0.00575	0.009	0.00678	0.005108	0.01079	0.008355	0.006471	0.01256	0.00959	0.007326	0.01147	0.008638	0.006508	0.01374	0.01064	0.008244
5.05	0.009494	0.007252	0.005539	0.00875	0.006592	0.004966	0.0103	0.007975	0.006176	0.00835	0.006378	0.004872	0.007696	0.005798	0.004368	0.009057	0.007014	0.005432	0.01064	0.008125	0.006206	0.009804	0.007386	0.005564	0.01154	0.008936	0.00692
5.15	0.008043	0.006144	0.004693	0.007482	0.005637	0.004246	0.008644	0.006695	0.005185	0.007074	0.005404	0.004127	0.00658	0.004957	0.003735	0.007603	0.005888	0.00456	0.009012	0.006884	0.005258	0.008383	0.006316	0.004758	0.009686	0.007501	0.005809
5.25	0.006814	0.005205	0.003976	0.006398	0.00482	0.003631	0.007256	0.00562	0.004352	0.005993	0.004578	0.003497	0.005627	0.004239	0.003193	0.006382	0.004943	0.003828	0.007636	0.005832	0.004455	0.007168	0.0054	0.004068	0.008131	0.006297	0.004877
5.35	0.005773	0.00441	0.003368	0.00547	0.004121	0.003105	0.006092	0.004718	0.003654	0.005078	0.003879	0.002963	0.004811	0.003625	0.002731	0.005358	0.004149	0.003213	0.006469	0.004941	0.003774	0.006129	0.004618	0.003479	0.006825	0.005286	0.004094
5.45	0.004891	0.003736	0.002854	0.004677	0.003524	0.002655	0.005114	0.00396	0.003067	0.004302	0.003286	0.00251	0.004114	0.003099	0.002335	0.004497	0.003483	0.002698	0.005481	0.004186	0.003198	0.005241	0.003948	0.002975	0.00573	0.004437	0.003437
5.55	0.004144	0.003165	0.002418	0.004	0.003013	0.00227	0.004293	0.003324	0.002575	0.003645	0.002784	0.002127	0.003518	0.00265	0.001996	0.003775	0.002924	0.002264	0.004643	0.003547	0.002709	0.004481	0.003376	0.002543	0.00481	0.003725	0.002885
5.65	0.003511	0.002682	0.002048	0.00342	0.002576	0.001941	0.003604	0.002791	0.002161	0.003088	0.002359	0.001802	0.003008	0.002266	0.001707	0.003169	0.002455	0.001901	0.003934	0.003005	0.002295	0.003832	0.002887	0.002175	0.004038	0.003127	0.002422
5.75	0.002975	0.002272	0.001736	0.002924	0.002203	0.00166	0.003025	0.002343	0.001814	0.002616	0.001998	0.001526	0.002572	0.001938	0.00146	0.002661	0.00206	0.001596	0.003333	0.002546	0.001945	0.003277	0.002468	0.00186	0.003389	0.002625	0.002033
5.85	0.00252	0.001925	0.00147	0.0025	0.001884	0.001419	0.002539	0.001967	0.001523	0.002217	0.001693	0.001293	0.002199	0.001657	0.001248	0.002233	0.00173	0.00134	0.002824	0.002157	0.001648	0.002802	0.002111	0.00159	0.002845	0.002204	0.001707
5.95	0.002135	0.001631	0.001246	0.002138	0.001611	0.001213	0.002132	0.001651	0.001279	0.001878	0.001434	0.001096	0.00188	0.001417	0.001067	0.001875	0.001452	0.001125	0.002392	0.001827	0.001396	0.002396	0.001805	0.00136	0.002389	0.00185	0.001433
6.05	0.001809	0.001382	0.001055	0.001828	0.001377	0.001038	0.001789	0.001386	0.001073	0.001591	0.001215	0.0009283	0.001608	0.001211	0.0009125	0.001574	0.001219	0.000944	0.002027	0.001548	0.001183	0.002048	0.001543	0.001163	0.002005	0.001553	0.001203
6.15	0.001533	0.001171	0.0008942	0.001563	0.001178	0.0008872	0.001502	0.001163	0.000901	0.001348	0.00103	0.0007865	0.001375	0.001036	0.0007803	0.001321	0.001023	0.0007924	0.001717	0.001312	0.001002	0.001752	0.00132	0.0009941	0.001683	0.001304	0.00101
6.25	0.001298	0.0009918	0.0007576	0.001337	0.001007	0.0007586	0.001261	0.0009766	0.0007564	0.001142	0.0008723	0.0006663	0.001176	0.0008856	0.0006672	0.001109	0.000859	0.0006652	0.001455	0.001111	0.0008489	0.001498	0.001128	0.00085	0.001413	0.001094	0.0008475
6.35	0.0011	0.0008403	0.0006418	0.001143	0.000861	0.0006487	0.001059	0.0008198	0.0006349	0.0009676	0.0007391	0.0005645	0.001005	0.0007573	0.0005705	0.000931	0.0007211	0.0005584	0.001233	0.0009415	0.0007192	0.001281	0.0009648	0.0007268	0.001186	0.0009186	0.0007114
6.45	0.000932	0.0007119	0.0005438	0.0009773	0.0007362	0.0005546	0.0008886	0.0006882	0.000533	0.0008197	0.0006261	0.0004783	0.0008595	0.0006475	0.0004878	0.0007816	0.0006053	0.0004688	0.001044	0.0007977	0.0006093	0.001095	0.0008249	0.0006215	0.0009957	0.0007711	0.0005972
6.55	0.0007896	0.0006032	0.0004607	0.0008356	0.0006295	0.0004743	0.000746	0.0005777	0.0004474	0.0006945	0.0005305	0.0004052	0.0007349	0.0005537	0.0004171	0.0006561	0.0005081	0.0003935	0.0008848	0.0006758	0.0005162	0.0009363	0.0007054	0.0005314	0.0008359	0.0006473	0.0005013
6.65	0.000669	0.000511	0.0003903	0.0007145	0.0005383	0.0004055	0.0006262	0.000485	0.0003756	0.0005884	0.0004494	0.0003433	0.0006284	0.0004734	0.0003567	0.0005508	0.0004266	0.0003303	0.0007496	0.0005726	0.0004374	0.0008006	0.0006031	0.0004544	0.0007017	0.0005434	0.0004209
6.75	0.0005668	0.0004329	0.0003307	0.000611	0.0004603	0.0003467	0.0005257	0.0004071	0.0003153	0.0004985	0.0003808	0.0002909	0.0005373	0.0004048	0.000305	0.0004623	0.0003581	0.0002773	0.0006351	0.0004851	0.0003705	0.0006846	0.0005157	0.0003885	0.000589	0.0004562	0.0003533
6.85	0.0004802	0.0003668	0.0002802	0.0005224	0.0003936	0.0002965	0.0004413	0.0003418	0.0002647	0.0004224	0.0003226	0.0002464	0.0004595	0.0003461	0.0002608	0.0003881	0.0003006	0.0002328	0.0005381	0.000411	0.0003139	0.0005853	0.000441	0.0003322	0.0004945	0.0003829	0.0002966
6.95	0.002317	0.0003108	0.0002374	0.00231	0.0003365	0.0002535	0.002324	0.0002869	0.0002222	0.002038	0.0002733	0.0002088	0.002031	0.000296	0.000223	0.002044	0.0002523	0.0001954	0.002596	0.0003482	0.000266	0.002588	0.0003771	0.0002841	0.002604	0.0003215	0.000249
7.05	0.002317	0.0008272	0.0002011	0.00231	0.0008374	0.0002168	0.002324	0.0008177	0.0001865	0.002038	0.0007275	0.0001769	0.002031	0.0007365	0.0001907	0.002044	0.0007192	0.000164	0.002596	0.0009268	0.0002253	0.002588	0.0009383	0.0002429	0.002604	0.0009163	0.000209
7.15	0.002317	0.00138	0.0001704	0.00231	0.001376	0.0001854	0.002324	0.001384	0.0001566	0.002038	0.001214	0.0001499	0.002031	0.00121	0.000163	0.002044	0.001217	0.0001377	0.002596	0.001546	0.0001909	0.002588	0.001542	0.0002077	0.002604	0.001551	0.0001754
7.25	0.002317	0.00138	0.0008221	0.00231	0.001376	0.0008195	0.002324	0.001384	0.0008245	0.002038	0.001214	0.0007231	0.002031	0.00121	0.0007208	0.002044	0.001217	0.0007251	0.002596	0.001546	0.0009212	0.002588	0.001542	0.0009183	0.002604	0.001551	0.0009238
7.35	0.002317	0.00138	0.0008221	0.00231	0.001376	0.0008195	0.002324	0.001384	0.0008245	0.002038	0.001214	0.0007231	0.002031	0.00121	0.0007208	0.002044	0.001217	0.0007251	0.002596	0.001546	0.0009212	0.002588	0.001542	0.0009183	0.002604	0.001551	0.0009238
7.45	0	0.00138	0.0008221	0	0.001376	0.0008195	0	0.001384	0.0008245	0	0.001214	0.0007231	0	0.00121	0.0007208	0	0.001217	0.0007251	0	0.001546	0.0009212	0	0.001542	0.0009183	0	0.001551	0.0009238
7.55	0	0.0006901	0.0008221	0	0.0006879	0.0008195	0	0.0006921	0.0008245	0	0.0006069	0.0007231	0	0.000605	0.0007208	0	0.0006087	0.0007251	0	0.0007732	0.0009212	0	0.0007708	0.0009183	0	0.0007754	0.0009238
7.65	0	0	0.0008221	0	0	0.0008195	0	0	0.0008245	0	0	0.0007231	0	0	0.0007208	0	0	0.0007251	0	0	0.0009212	0	0	0.0009183	0	0	0.0009238
Segments 3+2_1+2_2+2_3		Weights /Earthquake Rates
Magnitude	0.0375	0.075	0.0375	0.0375	0.075	0.0375	0.05	0.1	0.05	0.01875	0.0375	0.01875	0.01875	0.0375	0.01875	0.025	0.05	0.025	0.01875	0.0375	0.01875	0.01875	0.0375	0.01875	0.025	0.05	0.025
4.05	0.06487	0.04955	0.03785	0.05329	0.04014	0.03024	0.07895	0.06114	0.04735	0.07129	0.05446	0.0416	0.05856	0.04412	0.03324	0.08676	0.0672	0.05204	0.05845	0.04464	0.0341	0.04801	0.03617	0.02725	0.07113	0.05509	0.04266
4.15	0.05496	0.04198	0.03207	0.04556	0.03433	0.02586	0.06627	0.05133	0.03975	0.0604	0.04614	0.03524	0.05008	0.03772	0.02842	0.07284	0.05641	0.04369	0.04952	0.03782	0.02889	0.04105	0.03093	0.0233	0.05971	0.04624	0.03581
4.25	0.04656	0.03557	0.02717	0.03896	0.02935	0.02211	0.05563	0.04309	0.03337	0.05117	0.03909	0.02986	0.04282	0.03226	0.0243	0.06114	0.04735	0.03667	0.04195	0.03205	0.02448	0.0351	0.02645	0.01992	0.05013	0.03882	0.03007
4.35	0.03945	0.03013	0.02302	0.03331	0.0251	0.01891	0.0467	0.03617	0.02801	0.04336	0.03312	0.0253	0.03661	0.02758	0.02078	0.05133	0.03975	0.03079	0.03554	0.02715	0.02074	0.03002	0.02261	0.01704	0.04208	0.03259	0.02524
4.45	0.03342	0.02553	0.0195	0.02849	0.02146	0.01617	0.03921	0.03036	0.02351	0.03673	0.02806	0.02143	0.03131	0.02358	0.01777	0.04309	0.03337	0.02584	0.03011	0.023	0.01757	0.02567	0.01934	0.01457	0.03532	0.02736	0.02119
4.55	0.02832	0.02163	0.01652	0.02436	0.01835	0.01382	0.03291	0.02549	0.01974	0.03112	0.02377	0.01816	0.02677	0.02017	0.01519	0.03617	0.02801	0.02169	0.02551	0.01949	0.01489	0.02195	0.01653	0.01246	0.02965	0.02296	0.01779
4.65	0.02399	0.01833	0.014	0.02083	0.01569	0.01182	0.02763	0.0214	0.01657	0.02637	0.02014	0.01538	0.02289	0.01724	0.01299	0.03036	0.02351	0.01821	0.02162	0.01651	0.01261	0.01876	0.01414	0.01065	0.02489	0.01928	0.01493
4.75	0.02033	0.01553	0.01186	0.01781	0.01342	0.01011	0.02319	0.01796	0.01391	0.02234	0.01706	0.01303	0.01957	0.01474	0.01111	0.02549	0.01974	0.01529	0.01831	0.01399	0.01068	0.01605	0.01209	0.009106	0.0209	0.01618	0.01253
4.85	0.01722	0.01315	0.01005	0.01523	0.01147	0.008642	0.01947	0.01508	0.01168	0.01893	0.01446	0.01104	0.01674	0.01261	0.009498	0.0214	0.01657	0.01283	0.01552	0.01185	0.009053	0.01372	0.01034	0.007787	0.01754	0.01359	0.01052
4.95	0.01459	0.01114	0.008512	0.01302	0.009809	0.00739	0.01634	0.01266	0.009803	0.01603	0.01225	0.009355	0.01431	0.01078	0.008121	0.01796	0.01391	0.01077	0.01315	0.01004	0.00767	0.01173	0.008838	0.006658	0.01473	0.0114	0.008832
5.05	0.01236	0.009442	0.007212	0.01113	0.008387	0.006319	0.01372	0.01063	0.008229	0.01358	0.01038	0.007926	0.01224	0.009218	0.006944	0.01508	0.01168	0.009044	0.01114	0.008507	0.006498	0.01003	0.007557	0.005693	0.01236	0.009573	0.007414
5.15	0.01047	0.007999	0.00611	0.00952	0.007172	0.005403	0.01152	0.00892	0.006908	0.01151	0.008791	0.006715	0.01046	0.007882	0.005938	0.01266	0.009803	0.007592	0.009436	0.007207	0.005505	0.008577	0.006462	0.004868	0.01038	0.008036	0.006224
5.25	0.008873	0.006777	0.005177	0.00814	0.006132	0.00462	0.009668	0.007488	0.005799	0.009751	0.007448	0.005689	0.008946	0.00674	0.005077	0.01063	0.008229	0.006373	0.007994	0.006106	0.004664	0.007334	0.005525	0.004162	0.008711	0.006746	0.005225
5.35	0.007517	0.005742	0.004386	0.00696	0.005244	0.00395	0.008116	0.006286	0.004868	0.008261	0.00631	0.00482	0.007649	0.005763	0.004341	0.00892	0.006908	0.00535	0.006773	0.005173	0.003952	0.006271	0.004724	0.003559	0.007312	0.005663	0.004386
5.45	0.006369	0.004865	0.003716	0.005952	0.004484	0.003378	0.006813	0.005276	0.004086	0.006999	0.005346	0.004084	0.006541	0.004928	0.003712	0.007488	0.005799	0.004491	0.005738	0.004383	0.003348	0.005362	0.00404	0.003043	0.006138	0.004754	0.003682
5.55	0.005396	0.004121	0.003148	0.005089	0.003834	0.002888	0.005719	0.004429	0.00343	0.00593	0.00453	0.00346	0.005593	0.004213	0.003174	0.006286	0.004868	0.00377	0.004861	0.003713	0.002836	0.004585	0.003454	0.002602	0.005153	0.003991	0.003091
5.65	0.004571	0.003492	0.002667	0.004351	0.003278	0.00247	0.004801	0.003718	0.00288	0.005024	0.003838	0.002931	0.004782	0.003603	0.002714	0.005276	0.004086	0.003165	0.004119	0.003146	0.002403	0.003921	0.002954	0.002225	0.004326	0.00335	0.002595
5.75	0.003873	0.002958	0.00226	0.003721	0.002803	0.002112	0.00403	0.003121	0.002417	0.004256	0.003251	0.002483	0.004089	0.003081	0.002321	0.004429	0.00343	0.002657	0.00349	0.002665	0.002036	0.003352	0.002525	0.001903	0.003631	0.002812	0.002178
5.85	0.003281	0.002506	0.001914	0.003181	0.002397	0.001806	0.003383	0.00262	0.002029	0.003606	0.002755	0.002104	0.003496	0.002634	0.001984	0.003718	0.00288	0.00223	0.002956	0.002258	0.001725	0.002866	0.002159	0.001627	0.003048	0.002361	0.001828
5.95	0.00278	0.002123	0.001622	0.00272	0.002049	0.001544	0.00284	0.0022	0.001703	0.003055	0.002334	0.001783	0.00299	0.002252	0.001697	0.003121	0.002417	0.001872	0.002505	0.001913	0.001461	0.002451	0.001846	0.001391	0.002559	0.001982	0.001535
6.05	0.002355	0.001799	0.001374	0.002326	0.001752	0.00132	0.002384	0.001846	0.00143	0.002589	0.001977	0.00151	0.002556	0.001926	0.001451	0.00262	0.002029	0.001572	0.002122	0.001621	0.001238	0.002096	0.001579	0.001189	0.002148	0.001664	0.001288
6.15	0.001995	0.001524	0.001164	0.001989	0.001498	0.001129	0.002001	0.00155	0.0012	0.002193	0.001675	0.00128	0.002186	0.001647	0.001241	0.0022	0.001704	0.001319	0.001798	0.001373	0.001049	0.001792	0.00135	0.001017	0.001803	0.001397	0.001082
6.25	0.001691	0.001291	0.0009864	0.001701	0.001281	0.0009652	0.00168	0.001301	0.001008	0.001858	0.001419	0.001084	0.001869	0.001408	0.001061	0.001846	0.00143	0.001107	0.001523	0.001164	0.0008887	0.001532	0.001154	0.0008697	0.001514	0.001172	0.0009079
6.35	0.001432	0.001094	0.0008357	0.001454	0.001096	0.0008253	0.00141	0.001092	0.0008459	0.001574	0.001202	0.0009184	0.001598	0.001204	0.000907	0.00155	0.0012	0.0009297	0.001291	0.0009858	0.000753	0.00131	0.0009871	0.0007436	0.001271	0.0009842	0.0007622
6.45	0.001214	0.0009269	0.000708	0.001243	0.0009368	0.0007057	0.001184	0.0009169	0.0007101	0.001334	0.001019	0.0007781	0.001367	0.00103	0.0007756	0.001301	0.001008	0.0007804	0.001093	0.0008352	0.0006379	0.00112	0.000844	0.0006358	0.001067	0.0008262	0.0006398
6.55	0.001028	0.0007853	0.0005999	0.001063	0.000801	0.0006034	0.0009939	0.0007697	0.0005961	0.00113	0.0008631	0.0006593	0.001168	0.0008803	0.0006632	0.001092	0.0008459	0.0006552	0.0009263	0.0007076	0.0005405	0.000958	0.0007217	0.0005437	0.0008955	0.0006935	0.0005371
6.65	0.0008711	0.0006653	0.0005082	0.0009091	0.0006849	0.000516	0.0008343	0.0006462	0.0005004	0.0009573	0.0007312	0.0005585	0.0009991	0.0007527	0.0005671	0.0009169	0.0007101	0.00055	0.0007848	0.0005995	0.0004579	0.0008191	0.0006171	0.0004649	0.0007517	0.0005822	0.0004509
6.75	0.000738	0.0005637	0.0004306	0.0007774	0.0005856	0.0004412	0.0007004	0.0005424	0.0004201	0.0008111	0.0006195	0.0004732	0.0008543	0.0006436	0.0004849	0.0007697	0.0005961	0.0004617	0.0006649	0.0005079	0.0003879	0.0007004	0.0005277	0.0003975	0.000631	0.0004887	0.0003785
6.85	0.0006252	0.0004776	0.0003648	0.0006647	0.0005008	0.0003772	0.000588	0.0004553	0.0003526	0.0006871	0.0005249	0.0004009	0.0007305	0.0005503	0.0004146	0.0006462	0.0005004	0.0003876	0.0005633	0.0004303	0.0003287	0.0005989	0.0004512	0.0003399	0.0005297	0.0004103	0.0003177
6.95	0.0005297	0.0004046	0.0003091	0.0005684	0.0004282	0.0003226	0.0004936	0.0003822	0.000296	0.0005822	0.0004447	0.0003397	0.0006246	0.0004706	0.0003545	0.0005424	0.0004201	0.0003253	0.0004773	0.0003646	0.0002785	0.0005121	0.0003858	0.0002906	0.0004447	0.0003444	0.0002667
7.05	0.0004488	0.0003428	0.0002618	0.000486	0.0003661	0.0002758	0.0004143	0.0003209	0.0002485	0.0004932	0.0003767	0.0002878	0.0005341	0.0004024	0.0003031	0.0004553	0.0003526	0.0002731	0.0004044	0.0003089	0.0002359	0.0004379	0.0003299	0.0002485	0.0003733	0.0002891	0.0002239
7.15	0.001195	0.0002904	0.0002218	0.001209	0.0003131	0.0002358	0.001181	0.0002694	0.0002086	0.001313	0.0003192	0.0002438	0.001329	0.0003441	0.0002592	0.001298	0.000296	0.0002293	0.001076	0.0002617	0.0001999	0.00109	0.0002821	0.0002125	0.001064	0.0002427	0.000188
7.25	0.001993	0.0002461	0.000188	0.001987	0.0002677	0.0002017	0.001999	0.0002261	0.0001751	0.002191	0.0002704	0.0002066	0.002184	0.0002942	0.0002216	0.002197	0.0002485	0.0001925	0.001796	0.0002217	0.0001693	0.00179	0.0002412	0.0001817	0.001801	0.0002037	0.0001578
7.35	0.001993	0.001187	0.0001592	0.001987	0.001184	0.0001724	0.001999	0.001191	0.000147	0.002191	0.001305	0.000175	0.002184	0.001301	0.0001895	0.002197	0.001309	0.0001616	0.001796	0.00107	0.0001435	0.00179	0.001066	0.0001554	0.001801	0.001073	0.0001325
7.45	0.001993	0.001187	0.0004239	0.001987	0.001184	0.0004291	0.001999	0.001191	0.000419	0.002191	0.001305	0.0004658	0.002184	0.001301	0.0004716	0.002197	0.001309	0.0004605	0.001796	0.00107	0.0003819	0.00179	0.001066	0.0003866	0.001801	0.001073	0.0003775
7.55	0.001993	0.001187	0.0007072	0.001987	0.001184	0.000705	0.001999	0.001191	0.0007092	0.002191	0.001305	0.0007772	0.002184	0.001301	0.0007748	0.002197	0.001309	0.0007794	0.001796	0.00107	0.0006372	0.00179	0.001066	0.0006352	0.001801	0.001073	0.000639
7.65	0.0009966	0.001187	0.0007072	0.0009935	0.001184	0.000705	0.0009994	0.001191	0.0007092	0.001095	0.001305	0.0007772	0.001092	0.001301	0.0007748	0.001098	0.001309	0.0007794	0.0008979	0.00107	0.0006372	0.0008951	0.001066	0.0006352	0.0009005	0.001073	0.000639
7.75	0	0.001187	0.0007072	0	0.001184	0.000705	0	0.001191	0.0007092	0	0.001305	0.0007772	0	0.001301	0.0007748	0	0.001309	0.0007794	0	0.00107	0.0006372	0	0.001066	0.0006352	0	0.001073	0.000639
7.85	0	5.661e-09	0.0007072	0	5.644e-09	0.000705	0	5.677e-09	0.0007092	0	6.222e-09	0.0007772	0	6.202e-09	0.0007748	0	6.24e-09	0.0007794	0	5.101e-09	0.0006372	0	5.085e-09	0.0006352	0	5.115e-09	0.000639
7.95	0	0	0.0003536	0	0	0.0003525	0	0	0.0003546	0	0	0.0003886	0	0	0.0003874	0	0	0.0003897	0	0	0.0003186	0	0	0.0003176	0	0	0.0003195
Segments 2_1+2_2+2_3+1		Weights /Earthquake Rates
Magnitude	0.0375	0.075	0.0375	0.0375	0.075	0.0375	0.05	0.1	0.05	0.01875	0.0375	0.01875	0.01875	0.0375	0.01875	0.025	0.05	0.025	0.01875	0.0375	0.01875	0.01875	0.0375	0.01875	0.025	0.05	0.025
4.05	0.05481	0.04186	0.03198	0.04515	0.03401	0.02562	0.06652	0.05151	0.0399	0.06107	0.04665	0.03563	0.05031	0.0379	0.02855	0.07412	0.0574	0.04446	0.04854	0.03708	0.02832	0.03999	0.03012	0.02269	0.05892	0.04563	0.03534
4.15	0.04643	0.03547	0.02709	0.0386	0.02908	0.02191	0.05584	0.04324	0.03349	0.05174	0.03952	0.03019	0.04301	0.03241	0.02441	0.06222	0.04819	0.03732	0.04113	0.03141	0.024	0.03419	0.02576	0.0194	0.04946	0.0383	0.02966
4.25	0.03934	0.03005	0.02295	0.03301	0.02487	0.01873	0.04687	0.0363	0.02811	0.04384	0.03348	0.02558	0.03678	0.02771	0.02087	0.05223	0.04045	0.03133	0.03484	0.02662	0.02033	0.02924	0.02202	0.01659	0.04152	0.03215	0.0249
4.35	0.03333	0.02546	0.01945	0.02822	0.02126	0.01602	0.03935	0.03047	0.0236	0.03714	0.02837	0.02167	0.03145	0.02369	0.01785	0.04385	0.03396	0.0263	0.02952	0.02255	0.01722	0.025	0.01883	0.01419	0.03485	0.02699	0.0209
4.45	0.02824	0.02157	0.01648	0.02413	0.01818	0.0137	0.03303	0.02558	0.01981	0.03147	0.02403	0.01836	0.02689	0.02026	0.01526	0.03681	0.02851	0.02208	0.02501	0.0191	0.01459	0.02138	0.0161	0.01213	0.02926	0.02266	0.01755
4.55	0.02392	0.01827	0.01396	0.02064	0.01555	0.01171	0.02773	0.02147	0.01663	0.02666	0.02036	0.01555	0.02299	0.01732	0.01305	0.0309	0.02393	0.01853	0.02119	0.01619	0.01236	0.01828	0.01377	0.01037	0.02456	0.01902	0.01473
4.65	0.02027	0.01548	0.01183	0.01764	0.01329	0.01001	0.02328	0.01803	0.01396	0.02259	0.01725	0.01318	0.01966	0.01481	0.01116	0.02594	0.02009	0.01556	0.01795	0.01371	0.01047	0.01563	0.01177	0.00887	0.02062	0.01597	0.01237
4.75	0.01717	0.01312	0.01002	0.01509	0.01137	0.008563	0.01954	0.01513	0.01172	0.01914	0.01462	0.01116	0.01681	0.01267	0.009541	0.02177	0.01686	0.01306	0.01521	0.01162	0.008874	0.01336	0.01007	0.007584	0.01731	0.0134	0.01038
4.85	0.01455	0.01111	0.008489	0.0129	0.009719	0.007322	0.0164	0.0127	0.009839	0.01621	0.01238	0.009459	0.01438	0.01083	0.008159	0.01828	0.01416	0.01096	0.01289	0.009843	0.007519	0.01143	0.008608	0.006485	0.01453	0.01125	0.008714
4.95	0.01233	0.009415	0.007192	0.01103	0.00831	0.006261	0.01377	0.01066	0.008259	0.01374	0.01049	0.008014	0.01229	0.00926	0.006976	0.01534	0.01188	0.009203	0.01092	0.008339	0.00637	0.00977	0.007361	0.005545	0.0122	0.009446	0.007315
5.05	0.01044	0.007977	0.006093	0.009432	0.007106	0.005353	0.01156	0.008952	0.006933	0.01164	0.008889	0.006789	0.01051	0.007918	0.005965	0.01288	0.009975	0.007726	0.00925	0.007065	0.005397	0.008354	0.006294	0.004741	0.01024	0.007929	0.006141
5.15	0.008848	0.006758	0.005162	0.008065	0.006076	0.004577	0.009704	0.007515	0.00582	0.009859	0.007531	0.005752	0.008987	0.00677	0.005101	0.01081	0.008374	0.006485	0.007837	0.005986	0.004572	0.007143	0.005382	0.004054	0.008595	0.006656	0.005155
5.25	0.007496	0.005726	0.004374	0.006896	0.005195	0.003914	0.008146	0.006309	0.004886	0.008353	0.00638	0.004873	0.007684	0.005789	0.004361	0.009077	0.00703	0.005444	0.006639	0.005071	0.003874	0.006108	0.004602	0.003467	0.007215	0.005588	0.004327
5.35	0.006351	0.004851	0.003705	0.005897	0.004442	0.003347	0.006838	0.005296	0.004101	0.007077	0.005406	0.004129	0.006571	0.00495	0.003729	0.00762	0.005901	0.00457	0.005625	0.004297	0.003282	0.005223	0.003935	0.002964	0.006057	0.004691	0.003633
5.45	0.005381	0.00411	0.003139	0.005042	0.003799	0.002862	0.00574	0.004446	0.003443	0.005996	0.00458	0.003498	0.005618	0.004233	0.003189	0.006396	0.004954	0.003836	0.004766	0.00364	0.002781	0.004466	0.003364	0.002535	0.005084	0.003938	0.003049
5.55	0.004559	0.003482	0.00266	0.004311	0.003248	0.002447	0.004819	0.003732	0.00289	0.00508	0.00388	0.002964	0.004804	0.003619	0.002727	0.005369	0.004158	0.003221	0.004038	0.003084	0.002356	0.003819	0.002877	0.002167	0.004268	0.003305	0.00256
5.65	0.003862	0.00295	0.002253	0.003687	0.002777	0.002092	0.004045	0.003133	0.002426	0.004304	0.003287	0.002511	0.004108	0.003095	0.002331	0.004507	0.003491	0.002704	0.003421	0.002613	0.001996	0.003265	0.00246	0.001853	0.003583	0.002775	0.002149
5.75	0.003272	0.002499	0.001909	0.003152	0.002375	0.001789	0.003396	0.00263	0.002037	0.003646	0.002785	0.002127	0.003512	0.002646	0.001993	0.003784	0.00293	0.002269	0.002898	0.002214	0.001691	0.002792	0.002103	0.001585	0.003008	0.002329	0.001804
5.85	0.002772	0.002118	0.001617	0.002695	0.002031	0.00153	0.002851	0.002208	0.00171	0.003089	0.00236	0.001802	0.003003	0.002263	0.001705	0.003176	0.00246	0.001905	0.002455	0.001876	0.001433	0.002387	0.001799	0.001355	0.002525	0.001955	0.001514
5.95	0.002349	0.001794	0.00137	0.002305	0.001736	0.001308	0.002393	0.001853	0.001435	0.002617	0.001999	0.001527	0.002568	0.001935	0.001458	0.002666	0.002065	0.001599	0.00208	0.001589	0.001214	0.002041	0.001538	0.001159	0.002119	0.001641	0.001271
6.05	0.00199	0.00152	0.001161	0.001971	0.001485	0.001118	0.002009	0.001556	0.001205	0.002217	0.001694	0.001294	0.002196	0.001654	0.001246	0.002238	0.001734	0.001343	0.001763	0.001346	0.001028	0.001745	0.001315	0.0009906	0.001779	0.001378	0.001067
6.15	0.001686	0.001288	0.0009836	0.001685	0.001269	0.0009564	0.001686	0.001306	0.001011	0.001879	0.001435	0.001096	0.001878	0.001415	0.001066	0.001879	0.001455	0.001127	0.001493	0.001141	0.0008712	0.001492	0.001124	0.0008471	0.001494	0.001157	0.0008958
6.25	0.001428	0.001091	0.0008334	0.001441	0.001085	0.0008177	0.001416	0.001096	0.000849	0.001592	0.001216	0.0009286	0.001606	0.00121	0.0009112	0.001577	0.001222	0.0009461	0.001265	0.0009663	0.0007381	0.001276	0.0009614	0.0007243	0.001254	0.000971	0.000752
6.35	0.00121	0.0009244	0.0007061	0.001232	0.0009281	0.0006992	0.001188	0.0009203	0.0007127	0.001348	0.00103	0.0007867	0.001373	0.001034	0.0007791	0.001324	0.001025	0.0007942	0.001072	0.0008187	0.0006254	0.001091	0.0008221	0.0006193	0.001053	0.0008151	0.0006313
6.45	0.001025	0.0007831	0.0005982	0.001053	0.0007936	0.0005979	0.0009975	0.0007726	0.0005983	0.001142	0.0008726	0.0006666	0.001174	0.0008843	0.0006662	0.001112	0.0008609	0.0006667	0.0009081	0.0006936	0.0005298	0.0009331	0.0007029	0.0005296	0.0008835	0.0006843	0.0005299
6.55	0.0008686	0.0006635	0.0005068	0.0009008	0.0006786	0.0005112	0.0008374	0.0006485	0.0005023	0.0009679	0.0007393	0.0005647	0.001004	0.0007562	0.0005697	0.0009331	0.0007227	0.0005597	0.0007694	0.0005877	0.0004489	0.0007978	0.0006011	0.0004528	0.0007417	0.0005744	0.0004449
6.65	0.0007359	0.0005621	0.0004294	0.0007702	0.0005803	0.0004371	0.000703	0.0005444	0.0004216	0.00082	0.0006264	0.0004784	0.0008583	0.0006466	0.0004871	0.0007833	0.0006066	0.0004698	0.0006518	0.0004979	0.0003803	0.0006822	0.0005139	0.0003872	0.0006226	0.0004822	0.0003734
6.75	0.0006235	0.0004763	0.0003638	0.0006586	0.0004962	0.0003738	0.0005901	0.000457	0.0003539	0.0006948	0.0005307	0.0004054	0.0007339	0.0005529	0.0004165	0.0006576	0.0005092	0.0003944	0.0005522	0.0004218	0.0003222	0.0005833	0.0004395	0.0003311	0.0005227	0.0004048	0.0003135
6.85	0.0005283	0.0004035	0.0003082	0.0005631	0.0004242	0.0003196	0.0004954	0.0003836	0.0002971	0.0005886	0.0004496	0.0003434	0.0006275	0.0004727	0.0003561	0.000552	0.0004275	0.0003311	0.0004679	0.0003574	0.000273	0.0004988	0.0003758	0.0002831	0.0004388	0.0003398	0.0002632
6.95	0.0004475	0.0003419	0.0002611	0.0004815	0.0003628	0.0002733	0.0004158	0.0003221	0.0002494	0.0004987	0.0003809	0.000291	0.0005366	0.0004042	0.0003045	0.0004634	0.0003589	0.0002779	0.0003964	0.0003028	0.0002313	0.0004265	0.0003213	0.0002421	0.0003683	0.0002853	0.0002209
7.05	0.0003792	0.0002896	0.0002212	0.0004117	0.0003102	0.0002337	0.0003491	0.0002704	0.0002094	0.0004225	0.0003227	0.0002465	0.0004588	0.0003456	0.0002604	0.000389	0.0003013	0.0002333	0.0003358	0.0002565	0.0001959	0.0003647	0.0002747	0.000207	0.0003092	0.0002395	0.0001854
7.15	0.001484	0.0002454	0.0001874	0.001486	0.0002652	0.0001998	0.001483	0.000227	0.0001758	0.001654	0.0002734	0.0002089	0.001656	0.0002955	0.0002226	0.001652	0.0002529	0.0001959	0.001315	0.0002173	0.000166	0.001316	0.0002349	0.000177	0.001313	0.000201	0.0001557
7.25	0.00177	0.0004654	0.0001588	0.001764	0.0004777	0.0001709	0.001775	0.000454	0.0001475	0.001972	0.0005186	0.0001769	0.001966	0.0005323	0.0001904	0.001978	0.0005059	0.0001644	0.001568	0.0004122	0.0001406	0.001563	0.0004231	0.0001513	0.001572	0.0004021	0.0001307
7.35	0.00177	0.001054	0.0001345	0.001764	0.001051	0.0001461	0.001775	0.001057	0.0001239	0.001972	0.001175	0.0001499	0.001966	0.001171	0.0001628	0.001978	0.001178	0.000138	0.001568	0.0009338	0.0001192	0.001563	0.0009308	0.0001294	0.001572	0.0009364	0.0001097
7.45	0.00177	0.001054	0.0005267	0.001764	0.001051	0.0005274	0.001775	0.001057	0.0005261	0.001972	0.001175	0.0005869	0.001966	0.001171	0.0005876	0.001978	0.001178	0.0005862	0.001568	0.0009338	0.0004665	0.001563	0.0009308	0.0004671	0.001572	0.0009364	0.000466
7.55	0.00177	0.001054	0.000628	0.001764	0.001051	0.000626	0.001775	0.001057	0.0006298	0.001972	0.001175	0.0006997	0.001966	0.001171	0.0006975	0.001978	0.001178	0.0007017	0.001568	0.0009338	0.0005562	0.001563	0.0009308	0.0005545	0.001572	0.0009364	0.0005578
7.65	0.000354	0.001054	0.000628	0.0003529	0.001051	0.000626	0.000355	0.001057	0.0006298	0.0003944	0.001175	0.0006997	0.0003932	0.001171	0.0006975	0.0003956	0.001178	0.0007017	0.0003135	0.0009338	0.0005562	0.0003125	0.0009308	0.0005545	0.0003144	0.0009364	0.0005578
7.75	0	0.000738	0.000628	0	0.0007356	0.000626	0	0.0007401	0.0006298	0	0.0008223	0.0006997	0	0.0008197	0.0006975	0	0.0008247	0.0007017	0	0.0006536	0.0005562	0	0.0006516	0.0005545	0	0.0006555	0.0005578
7.85	0	0	0.000628	0	0	0.000626	0	0	0.0006298	0	0	0.0006997	0	0	0.0006975	0	0	0.0007017	0	0	0.0005562	0	0	0.0005545	0	0	0.0005578
7.95	0	0	0.0001256	0	0	0.0001252	0	0	0.000126	0	0	0.0001399	0	0	0.0001395	0	0	0.0001403	0	0	0.0001112	0	0	0.0001109	0	0	0.0001116
Segments 3+2_1+2_2+2_3+1			Weights /Earthquake Rates
Magnitude	0.0375	0.075	0.0375	0.0375	0.075	0.0375	0.05	0.1	0.05	0.01875	0.0375	0.01875	0.01875	0.0375	0.01875	0.025	0.05	0.025	0.01875	0.0375	0.01875	0.01875	0.0375	0.01875	0.025	0.05	0.025
4.05	0.06049	0.0462	0.03529	0.04932	0.03716	0.02799	0.07416	0.05744	0.04448	0.06693	0.05112	0.03905	0.05457	0.04111	0.03097	0.08205	0.06355	0.04921	0.05406	0.04129	0.03154	0.04408	0.03321	0.02502	0.06627	0.05133	0.03975
4.15	0.05125	0.03915	0.0299	0.04218	0.03177	0.02394	0.06226	0.04821	0.03734	0.0567	0.04331	0.03308	0.04666	0.03515	0.02648	0.06888	0.05334	0.04131	0.0458	0.03498	0.02672	0.03769	0.02839	0.02139	0.05563	0.04309	0.03337
4.25	0.04342	0.03317	0.02533	0.03606	0.02717	0.02047	0.05226	0.04047	0.03135	0.04804	0.03669	0.02803	0.0399	0.03006	0.02264	0.05782	0.04478	0.03468	0.0388	0.02964	0.02264	0.03223	0.02428	0.01829	0.0467	0.03617	0.02801
4.35	0.03679	0.0281	0.02146	0.03084	0.02323	0.0175	0.04387	0.03398	0.02631	0.0407	0.03109	0.02375	0.03412	0.0257	0.01936	0.04854	0.03759	0.02911	0.03287	0.02511	0.01918	0.02756	0.02076	0.01564	0.0392	0.03036	0.02351
4.45	0.03117	0.02381	0.01818	0.02637	0.01986	0.01496	0.03683	0.02852	0.02209	0.03448	0.02634	0.02012	0.02917	0.02198	0.01656	0.04075	0.03156	0.02444	0.02785	0.02127	0.01625	0.02356	0.01775	0.01337	0.03291	0.02549	0.01974
4.55	0.0264	0.02017	0.01541	0.02255	0.01698	0.0128	0.03092	0.02394	0.01854	0.02921	0.02231	0.01704	0.02494	0.01879	0.01416	0.0342	0.02649	0.02052	0.0236	0.01802	0.01377	0.02015	0.01518	0.01143	0.02763	0.0214	0.01657
4.65	0.02237	0.01709	0.01305	0.01928	0.01452	0.01094	0.02595	0.0201	0.01557	0.02475	0.01891	0.01444	0.02133	0.01607	0.01211	0.02871	0.02224	0.01722	0.01999	0.01527	0.01166	0.01723	0.01298	0.009777	0.02319	0.01796	0.01391
4.75	0.01895	0.01448	0.01106	0.01648	0.01242	0.009355	0.02179	0.01687	0.01307	0.02097	0.01602	0.01223	0.01824	0.01374	0.01035	0.0241	0.01867	0.01446	0.01694	0.01294	0.009882	0.01473	0.0111	0.00836	0.01947	0.01508	0.01168
4.85	0.01606	0.01227	0.009369	0.01409	0.01062	0.007999	0.01829	0.01416	0.01097	0.01777	0.01357	0.01037	0.01559	0.01175	0.008851	0.02023	0.01567	0.01214	0.01435	0.01096	0.008372	0.0126	0.009489	0.007148	0.01634	0.01266	0.009802
4.95	0.0136	0.01039	0.007938	0.01205	0.00908	0.00684	0.01535	0.01189	0.009208	0.01505	0.0115	0.008782	0.01333	0.01005	0.007568	0.01699	0.01315	0.01019	0.01216	0.009286	0.007093	0.01077	0.008114	0.006112	0.01372	0.01063	0.008229
5.05	0.01153	0.008804	0.006725	0.01031	0.007764	0.005849	0.01289	0.009981	0.00773	0.01275	0.009741	0.00744	0.0114	0.00859	0.006471	0.01426	0.01104	0.008552	0.0103	0.007868	0.006009	0.009209	0.006938	0.005227	0.01152	0.008919	0.006908
5.15	0.009765	0.007459	0.005698	0.008812	0.006638	0.005001	0.01082	0.008379	0.006489	0.0108	0.008253	0.006304	0.009749	0.007345	0.005533	0.01197	0.00927	0.007179	0.008726	0.006666	0.005091	0.007874	0.005932	0.004469	0.009668	0.007487	0.005799
5.25	0.008273	0.00632	0.004827	0.007535	0.005676	0.004276	0.009082	0.007034	0.005447	0.009154	0.006992	0.005341	0.008336	0.00628	0.004731	0.01005	0.007782	0.006027	0.007393	0.005647	0.004314	0.006733	0.005072	0.003821	0.008116	0.006285	0.004868
5.35	0.007009	0.005354	0.00409	0.006443	0.004854	0.003656	0.007624	0.005904	0.004573	0.007755	0.005924	0.004525	0.007128	0.00537	0.004045	0.008435	0.006533	0.005059	0.006264	0.004785	0.003655	0.005757	0.004337	0.003267	0.006813	0.005276	0.004086
5.45	0.005939	0.004536	0.003465	0.005509	0.00415	0.003127	0.0064	0.004957	0.003839	0.00657	0.005019	0.003833	0.006095	0.004592	0.003459	0.007081	0.005484	0.004247	0.005307	0.004054	0.003096	0.004923	0.003709	0.002794	0.005719	0.004429	0.00343
5.55	0.005031	0.003843	0.002936	0.00471	0.003549	0.002673	0.005373	0.004161	0.003222	0.005567	0.004252	0.003248	0.005212	0.003926	0.002958	0.005944	0.004603	0.003565	0.004496	0.003434	0.002623	0.004209	0.003171	0.002389	0.004801	0.003718	0.00288
5.65	0.004263	0.003256	0.002487	0.004028	0.003034	0.002286	0.00451	0.003493	0.002705	0.004716	0.003602	0.002752	0.004456	0.003357	0.002529	0.00499	0.003864	0.002993	0.003809	0.00291	0.002222	0.003599	0.002712	0.002043	0.00403	0.003121	0.002417
5.75	0.003611	0.002759	0.002107	0.003444	0.002595	0.001955	0.003786	0.002932	0.002271	0.003996	0.003052	0.002331	0.00381	0.002871	0.002163	0.004189	0.003244	0.002512	0.003227	0.002465	0.001883	0.003078	0.002319	0.001747	0.003383	0.00262	0.002029
5.85	0.00306	0.002337	0.001785	0.002945	0.002219	0.001671	0.003178	0.002461	0.001906	0.003385	0.002586	0.001975	0.003258	0.002455	0.001849	0.003516	0.002723	0.002109	0.002734	0.002089	0.001595	0.002632	0.001983	0.001494	0.00284	0.0022	0.001703
5.95	0.002592	0.00198	0.001512	0.002518	0.001897	0.001429	0.002668	0.002066	0.0016	0.002868	0.002191	0.001673	0.002786	0.002099	0.001581	0.002952	0.002286	0.00177	0.002317	0.001769	0.001352	0.00225	0.001695	0.001277	0.002384	0.001846	0.00143
6.05	0.002196	0.001678	0.001281	0.002153	0.001622	0.001222	0.00224	0.001735	0.001343	0.00243	0.001856	0.001418	0.002382	0.001795	0.001352	0.002478	0.001919	0.001486	0.001963	0.001499	0.001145	0.001924	0.001449	0.001092	0.002001	0.00155	0.0012
6.15	0.001861	0.001421	0.001086	0.001841	0.001387	0.001045	0.00188	0.001456	0.001128	0.002059	0.001573	0.001201	0.002037	0.001535	0.001156	0.00208	0.001611	0.001248	0.001663	0.00127	0.0009701	0.001645	0.001239	0.0009337	0.00168	0.001301	0.001008
6.25	0.001576	0.001204	0.0009198	0.001574	0.001186	0.0008934	0.001578	0.001222	0.0009466	0.001744	0.001332	0.001018	0.001742	0.001312	0.0009885	0.001746	0.001352	0.001047	0.001409	0.001076	0.0008219	0.001407	0.00106	0.0007984	0.00141	0.001092	0.0008459
6.35	0.001336	0.00102	0.0007793	0.001346	0.001014	0.0007639	0.001325	0.001026	0.0007947	0.001478	0.001129	0.0008622	0.001489	0.001122	0.0008452	0.001466	0.001135	0.0008792	0.001194	0.0009117	0.0006964	0.001203	0.0009062	0.0006827	0.001184	0.0009169	0.0007101
6.45	0.001132	0.0008643	0.0006602	0.001151	0.0008671	0.0006532	0.001112	0.0008613	0.0006671	0.001252	0.0009563	0.0007305	0.001273	0.0009593	0.0007227	0.001231	0.000953	0.000738	0.001011	0.0007724	0.00059	0.001029	0.0007748	0.0005837	0.0009939	0.0007697	0.0005961
6.55	0.0009587	0.0007323	0.0005594	0.0009842	0.0007414	0.0005586	0.0009336	0.0007231	0.00056	0.001061	0.0008102	0.0006189	0.001089	0.0008203	0.000618	0.001033	0.0008	0.0006196	0.0008567	0.0006544	0.0004998	0.0008795	0.0006625	0.0004991	0.0008343	0.0006461	0.0005004
6.65	0.0008122	0.0006204	0.0004739	0.0008415	0.000634	0.0004776	0.0007838	0.000607	0.0004701	0.0008987	0.0006864	0.0005243	0.000931	0.0007014	0.0005284	0.0008671	0.0006716	0.0005201	0.0007258	0.0005544	0.0004235	0.000752	0.0005665	0.0004268	0.0007004	0.0005424	0.0004201
6.75	0.0006882	0.0005256	0.0004015	0.0007196	0.0005421	0.0004084	0.0006579	0.0005095	0.0003946	0.0007614	0.0005816	0.0004442	0.0007961	0.0005997	0.0004518	0.0007279	0.0005637	0.0004366	0.0006149	0.0004697	0.0003588	0.000643	0.0004844	0.0003649	0.0005879	0.0004553	0.0003526
6.85	0.000583	0.0004453	0.0003402	0.0006153	0.0004635	0.0003492	0.0005523	0.0004277	0.0003313	0.000645	0.0004927	0.0003763	0.0006807	0.0005128	0.0003863	0.0006111	0.0004732	0.0003665	0.000521	0.000398	0.000304	0.0005498	0.0004142	0.000312	0.0004935	0.0003822	0.000296
6.95	0.000494	0.0003773	0.0002882	0.0005261	0.0003963	0.0002986	0.0004636	0.0003591	0.0002781	0.0005465	0.0004174	0.0003189	0.0005821	0.0004385	0.0003303	0.000513	0.0003973	0.0003077	0.0004414	0.0003372	0.0002575	0.0004701	0.0003542	0.0002668	0.0004143	0.0003209	0.0002485
7.05	0.0004185	0.0003197	0.0002442	0.0004498	0.0003389	0.0002553	0.0003892	0.0003014	0.0002334	0.000463	0.0003537	0.0002701	0.0004977	0.0003749	0.0002825	0.0004306	0.0003335	0.0002583	0.000374	0.0002857	0.0002182	0.000402	0.0003028	0.0002281	0.0003478	0.0002694	0.0002086
7.15	0.0003546	0.0002708	0.0002069	0.0003846	0.0002898	0.0002183	0.0003267	0.000253	0.000196	0.0003923	0.0002996	0.0002289	0.0004256	0.0003206	0.0002415	0.0003615	0.00028	0.0002168	0.0003168	0.000242	0.0001849	0.0003437	0.0002589	0.0001951	0.000292	0.0002261	0.0001751
7.25	0.001235	0.0002294	0.0001753	0.00124	0.0002478	0.0001867	0.00123	0.0002124	0.0001645	0.001366	0.0002539	0.0001939	0.001372	0.0002741	0.0002065	0.001361	0.000235	0.000182	0.001103	0.000205	0.0001566	0.001108	0.0002214	0.0001668	0.001099	0.0001898	0.000147
7.35	0.001628	0.000352	0.0001485	0.001623	0.0003654	0.0001596	0.001632	0.0003396	0.0001381	0.001801	0.0003894	0.0001643	0.001795	0.0004043	0.0001766	0.001806	0.0003757	0.0001528	0.001455	0.0003145	0.0001327	0.00145	0.0003265	0.0001426	0.001459	0.0003034	0.0001234
7.45	0.001628	0.0009696	0.0001258	0.001623	0.0009665	0.0001365	0.001632	0.0009723	0.0001159	0.001801	0.001073	0.0001392	0.001795	0.001069	0.000151	0.001806	0.001076	0.0001283	0.001455	0.0008664	0.0001124	0.00145	0.0008637	0.000122	0.001459	0.0008689	0.0001036
7.55	0.001628	0.0009696	0.0004381	0.001623	0.0009665	0.00044	0.001632	0.0009723	0.0004364	0.001801	0.001073	0.0004847	0.001795	0.001069	0.0004868	0.001806	0.001076	0.0004829	0.001455	0.0008664	0.0003915	0.00145	0.0008637	0.0003932	0.001459	0.0008689	0.00039
7.65	0.001628	0.0009696	0.0005775	0.001623	0.0009665	0.0005757	0.001632	0.0009723	0.0005792	0.001801	0.001073	0.000639	0.001795	0.001069	0.000637	0.001806	0.001076	0.0006408	0.001455	0.0008664	0.0005161	0.00145	0.0008637	0.0005145	0.001459	0.0008689	0.0005176
7.75	0.0004883	0.0009696	0.0005775	0.0004868	0.0009665	0.0005757	0.0004897	0.0009723	0.0005792	0.0005403	0.001073	0.000639	0.0005386	0.001069	0.000637	0.0005418	0.001076	0.0006408	0.0004364	0.0008664	0.0005161	0.000435	0.0008637	0.0005145	0.0004376	0.0008689	0.0005176
7.85	0	0.0007757	0.0005775	0	0.0007732	0.0005757	0	0.0007779	0.0005792	0	0.0008582	0.000639	0	0.0008555	0.000637	0	0.0008606	0.0006408	0	0.0006932	0.0005161	0	0.000691	0.0005145	0	0.0006951	0.0005176
7.95	0	0	0.0005775	0	0	0.0005757	0	0	0.0005792	0	0	0.000639	0	0	0.000637	0	0	0.0006408	0	0	0.0005161	0	0	0.0005145	0	0	0.0005176
8.05	0	0	0.0001733	0	0	0.0001727	0	0	0.0001738	0	0	0.0001917	0	0	0.0001911	0	0	0.0001922	0	0	0.0001548	0	0	0.0001543	0	0	0.0001553
DUZCE_D1	Weights /Earthquake Rates
Magnitude	0.0375	0.075	0.0375	0.0375	0.075	0.0375	0.05	0.1	0.05	0.01875	0.0375	0.01875	0.01875	0.0375	0.01875	0.025	0.05	0.025	0.01875	0.0375	0.01875	0.01875	0.0375	0.01875	0.025	0.05	0.025
4.05	0.02269	0.01733	0.01324	0.02068	0.01558	0.01174	0.02488	0.01927	0.01492	0.01815	0.01386	0.01059	0.01654	0.01246	0.009389	0.0199	0.01541	0.01194	0.02722	0.02079	0.01588	0.02481	0.01869	0.01408	0.02986	0.02312	0.01791
4.15	0.01922	0.01468	0.01121	0.01768	0.01332	0.01004	0.02089	0.01617	0.01253	0.01538	0.01174	0.008971	0.01415	0.01066	0.008028	0.01671	0.01294	0.01002	0.02306	0.01762	0.01346	0.02122	0.01598	0.01204	0.02506	0.01941	0.01503
4.25	0.01628	0.01244	0.009501	0.01512	0.01139	0.008581	0.01753	0.01358	0.01052	0.01303	0.00995	0.0076	0.0121	0.009112	0.006865	0.01403	0.01086	0.008413	0.01954	0.01493	0.0114	0.01814	0.01367	0.0103	0.02104	0.01629	0.01262
4.35	0.0138	0.01054	0.008049	0.01293	0.009739	0.007337	0.01472	0.0114	0.008828	0.01104	0.00843	0.006439	0.01034	0.007791	0.00587	0.01177	0.009119	0.007062	0.01656	0.01265	0.009659	0.01551	0.01169	0.008805	0.01766	0.01368	0.01059
4.45	0.01169	0.008928	0.006819	0.01105	0.008328	0.006274	0.01236	0.009568	0.00741	0.009351	0.007142	0.005456	0.008843	0.006662	0.005019	0.009884	0.007655	0.005928	0.01403	0.01071	0.008183	0.01327	0.009993	0.007528	0.01483	0.01148	0.008892
4.55	0.009903	0.007564	0.005778	0.009452	0.007121	0.005364	0.01037	0.008032	0.006221	0.007922	0.006051	0.004622	0.007562	0.005697	0.004292	0.008297	0.006426	0.004977	0.01188	0.009077	0.006933	0.01134	0.008545	0.006437	0.01245	0.009639	0.007465
4.65	0.00839	0.006408	0.004895	0.008082	0.006089	0.004587	0.008706	0.006743	0.005222	0.006712	0.005127	0.003916	0.006466	0.004871	0.00367	0.006965	0.005394	0.004178	0.01007	0.00769	0.005874	0.009699	0.007306	0.005504	0.01045	0.008091	0.006266
4.75	0.007108	0.005429	0.004147	0.006911	0.005206	0.003922	0.007309	0.00566	0.004384	0.005686	0.004344	0.003318	0.005529	0.004165	0.003138	0.005847	0.004528	0.003507	0.00853	0.006515	0.004977	0.008293	0.006248	0.004707	0.008771	0.006792	0.00526
4.85	0.006022	0.0046	0.003514	0.005909	0.004452	0.003354	0.006135	0.004752	0.00368	0.004818	0.00368	0.002811	0.004727	0.003561	0.002683	0.004908	0.003801	0.002944	0.007227	0.00552	0.004216	0.007091	0.005342	0.004024	0.007362	0.005702	0.004416
4.95	0.005102	0.003897	0.002977	0.005053	0.003807	0.002868	0.00515	0.003989	0.003089	0.004082	0.003118	0.002381	0.004042	0.003045	0.002294	0.00412	0.003191	0.002471	0.006123	0.004677	0.003572	0.006063	0.004568	0.003441	0.006181	0.004787	0.003707
5.05	0.004323	0.003302	0.002522	0.00432	0.003255	0.002452	0.004324	0.003348	0.002593	0.003458	0.002641	0.002018	0.003456	0.002604	0.001962	0.003459	0.002679	0.002075	0.005187	0.003962	0.003026	0.005185	0.003906	0.002942	0.005188	0.004018	0.003112
5.15	0.003662	0.002797	0.002137	0.003694	0.002783	0.002097	0.003629	0.002811	0.002177	0.00293	0.002238	0.001709	0.002955	0.002226	0.001677	0.002904	0.002249	0.001742	0.004395	0.003357	0.002564	0.004433	0.00334	0.002516	0.004355	0.003373	0.002612
5.25	0.003103	0.00237	0.00181	0.003159	0.00238	0.001793	0.003047	0.00236	0.001827	0.002482	0.001896	0.001448	0.002527	0.001904	0.001434	0.002437	0.001888	0.001462	0.003723	0.002844	0.002172	0.003791	0.002856	0.002151	0.003656	0.002832	0.002193
5.35	0.002629	0.002008	0.001534	0.002701	0.002035	0.001533	0.002558	0.001981	0.001534	0.002103	0.001606	0.001227	0.002161	0.001628	0.001226	0.002046	0.001585	0.001227	0.003155	0.00241	0.00184	0.003241	0.002442	0.00184	0.003069	0.002377	0.001841
5.45	0.002227	0.001701	0.001299	0.00231	0.00174	0.001311	0.002147	0.001663	0.001288	0.001782	0.001361	0.00104	0.001848	0.001392	0.001049	0.001718	0.00133	0.00103	0.002673	0.002041	0.001559	0.002771	0.002088	0.001573	0.002576	0.001995	0.001545
5.55	0.001887	0.001441	0.001101	0.001975	0.001488	0.001121	0.001802	0.001396	0.001081	0.00151	0.001153	0.0008807	0.00158	0.00119	0.0008966	0.001442	0.001117	0.0008648	0.002264	0.00173	0.001321	0.00237	0.001785	0.001345	0.002163	0.001675	0.001297
5.65	0.001599	0.001221	0.0009327	0.001689	0.001272	0.0009584	0.001513	0.001172	0.0009075	0.001279	0.0009769	0.0007462	0.001351	0.001018	0.0007667	0.00121	0.0009374	0.000726	0.001918	0.001465	0.001119	0.002026	0.001527	0.00115	0.001816	0.001406	0.001089
5.75	0.001354	0.001035	0.0007902	0.001444	0.001088	0.0008195	0.00127	0.0009837	0.0007618	0.001084	0.0008276	0.0006322	0.001155	0.0008702	0.0006556	0.001016	0.0007869	0.0006094	0.001625	0.001241	0.0009483	0.001733	0.001305	0.0009834	0.001524	0.00118	0.0009142
5.85	0.001147	0.0008765	0.0006695	0.001235	0.0009301	0.0007007	0.001066	0.0008257	0.0006395	0.000918	0.0007012	0.0005356	0.0009877	0.0007441	0.0005606	0.000853	0.0006606	0.0005116	0.001377	0.001052	0.0008034	0.001482	0.001116	0.0008408	0.001279	0.0009909	0.0007674
5.95	0.0009722	0.0007426	0.0005672	0.001056	0.0007953	0.0005991	0.000895	0.0006932	0.0005368	0.0007778	0.0005941	0.0004538	0.0008445	0.0006362	0.0004793	0.000716	0.0005545	0.0004295	0.001167	0.0008911	0.0006807	0.001267	0.0009544	0.000719	0.001074	0.0008318	0.0006442
6.05	0.003806	0.0006291	0.0004806	0.003811	0.00068	0.0005123	0.003802	0.0005819	0.0004507	0.003045	0.0005033	0.0003844	0.003049	0.000544	0.0004098	0.003041	0.0004655	0.0003605	0.004567	0.000755	0.0005767	0.004573	0.000816	0.0006148	0.004562	0.0006983	0.0005408
6.15	0.004538	0.001193	0.0004071	0.004524	0.001225	0.0004381	0.004551	0.001164	0.0003783	0.00363	0.0009546	0.0003257	0.003619	0.0009799	0.0003504	0.003641	0.0009312	0.0003026	0.005445	0.001432	0.0004886	0.005428	0.00147	0.0005257	0.005461	0.001397	0.000454
6.25	0.004538	0.002703	0.0003449	0.004524	0.002695	0.0003746	0.004551	0.002711	0.0003176	0.00363	0.002162	0.000276	0.003619	0.002156	0.0002997	0.003641	0.002169	0.0002541	0.005445	0.003244	0.0004139	0.005428	0.003233	0.0004495	0.005461	0.003253	0.0003811
6.35	0.004538	0.002703	0.00135	0.004524	0.002695	0.001352	0.004551	0.002711	0.001349	0.00363	0.002162	0.00108	0.003619	0.002156	0.001082	0.003641	0.002169	0.001079	0.005445	0.003244	0.001621	0.005428	0.003233	0.001623	0.005461	0.003253	0.001619
6.45	0.004538	0.002703	0.00161	0.004524	0.002695	0.001605	0.004551	0.002711	0.001615	0.00363	0.002162	0.001288	0.003619	0.002156	0.001284	0.003641	0.002169	0.001292	0.005445	0.003244	0.001932	0.005428	0.003233	0.001926	0.005461	0.003253	0.001938
6.55	0.0009076	0.002703	0.00161	0.0009047	0.002695	0.001605	0.0009102	0.002711	0.001615	0.0007261	0.002162	0.001288	0.0007238	0.002156	0.001284	0.0007281	0.002169	0.001292	0.001089	0.003244	0.001932	0.001086	0.003233	0.001926	0.001092	0.003253	0.001938
6.65	0	0.001892	0.00161	0	0.001886	0.001605	0	0.001898	0.001615	0	0.001514	0.001288	0	0.001509	0.001284	0	0.001518	0.001292	0	0.002271	0.001932	0	0.002263	0.001926	0	0.002277	0.001938
6.75	0	0	0.00161	0	0	0.001605	0	0	0.001615	0	0	0.001288	0	0	0.001284	0	0	0.001292	0	0	0.001932	0	0	0.001926	0	0	0.001938
6.85	0	0	0.000322	0	0	0.000321	0	0	0.0003229	0	0	0.0002576	0	0	0.0002568	0	0	0.0002584	0	0	0.0003864	0	0	0.0003852	0	0	0.0003875
DUZCE_D2	Weights /Earthquake Rates
Magnitude	0.0375	0.075	0.0375	0.0375	0.075	0.0375	0.05	0.1	0.05	0.01875	0.0375	0.01875	0.01875	0.0375	0.01875	0.025	0.05	0.025	0.01875	0.0375	0.01875	0.01875	0.0375	0.01875	0.025	0.05	0.025
4.05	0.02793	0.02133	0.01629	0.024	0.01808	0.01362	0.03249	0.02516	0.01949	0.02234	0.01706	0.01303	0.0192	0.01446	0.0109	0.02599	0.02013	0.01559	0.03351	0.0256	0.01955	0.0288	0.0217	0.01634	0.03898	0.03019	0.02338
4.15	0.02366	0.01807	0.0138	0.02052	0.01546	0.01165	0.02727	0.02112	0.01636	0.01893	0.01446	0.01104	0.01642	0.01237	0.009317	0.02182	0.0169	0.01309	0.02839	0.02169	0.01657	0.02462	0.01855	0.01398	0.03273	0.02534	0.01963
4.25	0.02005	0.01531	0.0117	0.01755	0.01322	0.009958	0.02289	0.01773	0.01373	0.01604	0.01225	0.009356	0.01404	0.01057	0.007967	0.01831	0.01418	0.01098	0.02405	0.01837	0.01403	0.02106	0.01586	0.01195	0.02747	0.02128	0.01648
4.35	0.01698	0.01297	0.009909	0.015	0.0113	0.008515	0.01922	0.01488	0.01153	0.01359	0.01038	0.007927	0.012	0.009042	0.006812	0.01537	0.01191	0.009221	0.02038	0.01557	0.01189	0.018	0.01356	0.01022	0.02306	0.01786	0.01383
4.45	0.01439	0.01099	0.008395	0.01283	0.009665	0.007281	0.01613	0.01249	0.009676	0.01151	0.008792	0.006716	0.01026	0.007732	0.005825	0.01291	0.009995	0.007741	0.01727	0.01319	0.01007	0.01539	0.0116	0.008737	0.01936	0.01499	0.01161
4.55	0.01219	0.009311	0.007112	0.01097	0.008264	0.006226	0.01354	0.01049	0.008123	0.009752	0.007449	0.00569	0.008776	0.006611	0.004981	0.01083	0.008391	0.006498	0.01463	0.01117	0.008535	0.01316	0.009917	0.007471	0.01625	0.01259	0.009747
4.65	0.01033	0.007889	0.006026	0.00938	0.007066	0.005323	0.01137	0.008805	0.006819	0.008262	0.006311	0.004821	0.007504	0.005653	0.004259	0.009095	0.007044	0.005455	0.01239	0.009467	0.007231	0.01126	0.00848	0.006388	0.01364	0.01057	0.008183
4.75	0.00875	0.006684	0.005105	0.00802	0.006042	0.004552	0.009543	0.007391	0.005724	0.007	0.005347	0.004084	0.006416	0.004834	0.003641	0.007635	0.005913	0.004579	0.0105	0.00802	0.006126	0.009624	0.007251	0.005462	0.01145	0.008869	0.006869
4.85	0.007413	0.005663	0.004325	0.006858	0.005166	0.003892	0.008011	0.006204	0.004805	0.005931	0.00453	0.00346	0.005486	0.004133	0.003114	0.006409	0.004964	0.003844	0.008896	0.006795	0.00519	0.008229	0.0062	0.004671	0.009614	0.007445	0.005766
4.95	0.006281	0.004797	0.003664	0.005864	0.004418	0.003328	0.006725	0.005208	0.004034	0.005025	0.003838	0.002932	0.004691	0.003534	0.002662	0.00538	0.004167	0.003227	0.007537	0.005757	0.004397	0.007037	0.005301	0.003994	0.00807	0.00625	0.00484
5.05	0.005321	0.004065	0.003105	0.005014	0.003777	0.002846	0.005646	0.004372	0.003386	0.004257	0.003252	0.002484	0.004011	0.003022	0.002277	0.004516	0.003498	0.002709	0.006385	0.004877	0.003726	0.006017	0.004533	0.003415	0.006775	0.005247	0.004063
5.15	0.004508	0.003444	0.00263	0.004287	0.00323	0.002433	0.004739	0.00367	0.002843	0.003607	0.002755	0.002104	0.00343	0.002584	0.001947	0.003791	0.002936	0.002274	0.00541	0.004132	0.003156	0.005145	0.003876	0.00292	0.005687	0.004404	0.003411
5.25	0.00382	0.002918	0.002229	0.003666	0.002762	0.002081	0.003978	0.003081	0.002386	0.003056	0.002334	0.001783	0.002933	0.002209	0.001664	0.003183	0.002465	0.001909	0.004583	0.003501	0.002674	0.004399	0.003314	0.002497	0.004774	0.003697	0.002863
5.35	0.003236	0.002472	0.001888	0.003135	0.002362	0.001779	0.00334	0.002586	0.002003	0.002589	0.001977	0.00151	0.002508	0.001889	0.001423	0.002672	0.002069	0.001602	0.003883	0.002966	0.002266	0.003762	0.002834	0.002135	0.004008	0.003104	0.002404
5.45	0.002742	0.002094	0.0016	0.00268	0.002019	0.001521	0.002804	0.002171	0.001682	0.002193	0.001675	0.00128	0.002144	0.001615	0.001217	0.002243	0.001737	0.001345	0.00329	0.002513	0.00192	0.003216	0.002423	0.001825	0.003364	0.002605	0.002018
5.55	0.002323	0.001774	0.001355	0.002292	0.001727	0.001301	0.002353	0.001823	0.001412	0.001858	0.001419	0.001084	0.001833	0.001381	0.001041	0.001883	0.001458	0.001129	0.002787	0.002129	0.001626	0.00275	0.002072	0.001561	0.002824	0.002187	0.001694
5.65	0.001968	0.001503	0.001148	0.00196	0.001476	0.001112	0.001976	0.00153	0.001185	0.001574	0.001203	0.0009185	0.001568	0.001181	0.0008898	0.001581	0.001224	0.000948	0.002362	0.001804	0.001378	0.002352	0.001772	0.001335	0.002371	0.001836	0.001422
5.75	0.001667	0.001274	0.0009728	0.001676	0.001262	0.000951	0.001658	0.001284	0.0009947	0.001334	0.001019	0.0007782	0.001341	0.00101	0.0007608	0.001327	0.001028	0.0007958	0.002001	0.001528	0.001167	0.002011	0.001515	0.001141	0.00199	0.001541	0.001194
5.85	0.001413	0.001079	0.0008242	0.001433	0.001079	0.0008132	0.001392	0.001078	0.000835	0.00113	0.0008632	0.0006593	0.001146	0.0008635	0.0006505	0.001114	0.0008626	0.000668	0.001695	0.001295	0.000989	0.001719	0.001295	0.0009758	0.001671	0.001294	0.001002
5.95	0.001197	0.0009141	0.0006983	0.001225	0.000923	0.0006953	0.001169	0.0009051	0.000701	0.0009574	0.0007313	0.0005586	0.0009801	0.0007384	0.0005563	0.000935	0.0007241	0.0005608	0.001436	0.001097	0.0008379	0.00147	0.001108	0.0008344	0.001402	0.001086	0.0008412
6.05	0.001014	0.0007745	0.0005916	0.001048	0.0007892	0.0005946	0.0009811	0.0007598	0.0005884	0.0008112	0.0006196	0.0004733	0.0008381	0.0006314	0.0004756	0.0007849	0.0006078	0.0004708	0.001217	0.0009294	0.0007099	0.001257	0.000947	0.0007135	0.001177	0.0009118	0.0007061
6.15	0.000859	0.0006562	0.0005012	0.0008958	0.0006748	0.0005084	0.0008236	0.0006378	0.000494	0.0006872	0.0005249	0.000401	0.0007166	0.0005399	0.0004067	0.0006589	0.0005103	0.0003952	0.001031	0.0007874	0.0006014	0.001075	0.0008098	0.0006101	0.0009883	0.0007654	0.0005928
6.25	0.0007278	0.0005559	0.0004246	0.0007659	0.000577	0.0004347	0.0006914	0.0005354	0.0004147	0.0005822	0.0004447	0.0003397	0.0006127	0.0004616	0.0003478	0.0005531	0.0004283	0.0003317	0.0008734	0.0006671	0.0005096	0.0009191	0.0006924	0.0005216	0.0008296	0.0006425	0.0004976
6.35	0.0006166	0.000471	0.0003598	0.0006549	0.0004934	0.0003717	0.0005804	0.0004495	0.0003481	0.0004933	0.0003768	0.0002878	0.0005239	0.0003947	0.0002974	0.0004643	0.0003596	0.0002785	0.0007399	0.0005652	0.0004317	0.0007859	0.0005921	0.000446	0.0006964	0.0005394	0.0004177
6.45	0.0005224	0.000399	0.0003048	0.00056	0.0004219	0.0003178	0.0004872	0.0003773	0.0002922	0.0004179	0.0003192	0.0002438	0.000448	0.0003375	0.0002543	0.0003898	0.0003019	0.0002338	0.0006269	0.0004788	0.0003658	0.000672	0.0005063	0.0003814	0.0005846	0.0004528	0.0003507
6.55	0.0004426	0.0003381	0.0002582	0.0004788	0.0003607	0.0002718	0.000409	0.0003167	0.0002453	0.0003541	0.0002705	0.0002066	0.0003831	0.0002886	0.0002174	0.0003272	0.0002534	0.0001962	0.0005311	0.0004057	0.0003099	0.0005746	0.0004329	0.0003261	0.0004908	0.0003801	0.0002944
6.65	0.001006	0.0002864	0.0002188	0.001024	0.0003085	0.0002324	0.0009887	0.0002659	0.0002059	0.0008046	0.0002291	0.000175	0.0008194	0.0002468	0.0001859	0.000791	0.0002127	0.0001647	0.001207	0.0003437	0.0002625	0.001229	0.0003701	0.0002789	0.001186	0.0003191	0.0002471
6.75	0.001933	0.0002427	0.0001854	0.001927	0.0002637	0.0001987	0.001939	0.0002232	0.0001729	0.001547	0.0001941	0.0001483	0.001542	0.000211	0.000159	0.001551	0.0001786	0.0001383	0.00232	0.0002912	0.0002224	0.002313	0.0003165	0.0002384	0.002327	0.0002678	0.0002074
6.85	0.001933	0.001059	0.000157	0.001927	0.001057	0.0001699	0.001939	0.00106	0.0001451	0.001547	0.0008469	0.0001256	0.001542	0.0008459	0.0001359	0.001551	0.0008477	0.0001161	0.00232	0.00127	0.0001884	0.002313	0.001269	0.0002039	0.002327	0.001272	0.0001741
6.95	0.001933	0.001152	0.0003569	0.001927	0.001148	0.0003634	0.001939	0.001155	0.0003508	0.001547	0.0009213	0.0002855	0.001542	0.0009184	0.0002907	0.001551	0.0009239	0.0002806	0.00232	0.001382	0.0004282	0.002313	0.001378	0.0004361	0.002327	0.001386	0.000421
7.05	0.001933	0.001152	0.000686	0.001927	0.001148	0.0006838	0.001939	0.001155	0.0006879	0.001547	0.0009213	0.0005488	0.001542	0.0009184	0.0005471	0.001551	0.0009239	0.0005504	0.00232	0.001382	0.0008232	0.002313	0.001378	0.0008206	0.002327	0.001386	0.0008255
7.15	0.00116	0.001152	0.000686	0.001156	0.001148	0.0006838	0.001163	0.001155	0.0006879	0.000928	0.0009213	0.0005488	0.0009251	0.0009184	0.0005471	0.0009307	0.0009239	0.0005504	0.001392	0.001382	0.0008232	0.001388	0.001378	0.0008206	0.001396	0.001386	0.0008255
7.25	0	0.001152	0.000686	0	0.001148	0.0006838	0	0.001155	0.0006879	0	0.0009213	0.0005488	0	0.0009184	0.0005471	0	0.0009239	0.0005504	0	0.001382	0.0008232	0	0.001378	0.0008206	0	0.001386	0.0008255
7.35	0	0.0001152	0.000686	0	0.0001148	0.0006838	0	0.0001155	0.0006879	0	9.213e-05	0.0005488	0	9.184e-05	0.0005471	0	9.24e-05	0.0005504	0	0.0001382	0.0008232	0	0.0001378	0.0008206	0	0.0001386	0.0008255
7.45	0	0	0.0004116	0	0	0.0004103	0	0	0.0004128	0	0	0.0003293	0	0	0.0003282	0	0	0.0003302	0	0	0.0004939	0	0	0.0004924	0	0	0.0004953
DUZCE_D1+D2	Weights /Earthquake Rates
Magnitude	0.0375	0.075	0.0375	0.0375	0.075	0.0375	0.05	0.1	0.05	0.01875	0.0375	0.01875	0.01875	0.0375	0.01875	0.025	0.05	0.025	0.01875	0.0375	0.01875	0.01875	0.0375	0.01875	0.025	0.05	0.025
4.05	0.02882	0.02201	0.01681	0.02452	0.01847	0.01391	0.03387	0.02623	0.02031	0.02305	0.01761	0.01345	0.01961	0.01478	0.01113	0.02709	0.02098	0.01625	0.03458	0.02642	0.02018	0.02942	0.02216	0.0167	0.04064	0.03147	0.02438
4.15	0.02442	0.01865	0.01425	0.02096	0.01579	0.0119	0.02843	0.02202	0.01705	0.01953	0.01492	0.0114	0.01677	0.01263	0.009518	0.02274	0.01761	0.01364	0.0293	0.02238	0.01709	0.02516	0.01895	0.01428	0.03412	0.02642	0.02046
4.25	0.02069	0.0158	0.01207	0.01792	0.0135	0.01017	0.02387	0.01848	0.01431	0.01655	0.01264	0.009655	0.01434	0.0108	0.008138	0.01909	0.01479	0.01145	0.02482	0.01896	0.01448	0.02151	0.0162	0.01221	0.02864	0.02218	0.01718
4.35	0.01753	0.01339	0.01023	0.01533	0.01155	0.008699	0.02003	0.01552	0.01202	0.01402	0.01071	0.00818	0.01226	0.009237	0.006959	0.01603	0.01241	0.009613	0.02103	0.01606	0.01227	0.01839	0.01386	0.01044	0.02404	0.01862	0.01442
4.45	0.01485	0.01134	0.008663	0.01311	0.009873	0.007438	0.01682	0.01302	0.01009	0.01188	0.009073	0.00693	0.01048	0.007898	0.00595	0.01345	0.01042	0.00807	0.01782	0.01361	0.0104	0.01573	0.01185	0.008925	0.02018	0.01563	0.0121
4.55	0.01258	0.009609	0.00734	0.01121	0.008442	0.00636	0.01412	0.01093	0.008468	0.01006	0.007687	0.005872	0.008965	0.006754	0.005088	0.01129	0.008747	0.006774	0.0151	0.01153	0.008807	0.01345	0.01013	0.007632	0.01694	0.01312	0.01016
4.65	0.01066	0.008141	0.006218	0.009582	0.007219	0.005438	0.01185	0.009178	0.007108	0.008526	0.006513	0.004975	0.007665	0.005775	0.00435	0.009481	0.007343	0.005687	0.01279	0.009769	0.007462	0.0115	0.008662	0.006526	0.01422	0.01101	0.00853
4.75	0.00903	0.006897	0.005268	0.008193	0.006172	0.00465	0.009949	0.007705	0.005967	0.007224	0.005518	0.004215	0.006554	0.004938	0.00372	0.007959	0.006164	0.004774	0.01084	0.008277	0.006322	0.009832	0.007407	0.00558	0.01194	0.009246	0.007161
4.85	0.00765	0.005843	0.004463	0.007006	0.005278	0.003976	0.008351	0.006468	0.005009	0.00612	0.004675	0.003571	0.005605	0.004222	0.003181	0.006681	0.005174	0.004007	0.00918	0.007012	0.005356	0.008407	0.006333	0.004771	0.01002	0.007761	0.006011
4.95	0.006481	0.004951	0.003782	0.00599	0.004513	0.0034	0.007011	0.00543	0.004205	0.005185	0.003961	0.003025	0.004792	0.00361	0.00272	0.005609	0.004344	0.003364	0.007778	0.005941	0.004538	0.007188	0.005415	0.00408	0.008413	0.006515	0.005046
5.05	0.005491	0.004194	0.003204	0.005122	0.003859	0.002907	0.005885	0.004558	0.00353	0.004393	0.003356	0.002563	0.004098	0.003087	0.002326	0.004708	0.003646	0.002824	0.00659	0.005033	0.003845	0.006147	0.004631	0.003488	0.007062	0.005469	0.004236
5.15	0.004652	0.003554	0.002714	0.00438	0.0033	0.002486	0.00494	0.003826	0.002963	0.003722	0.002843	0.002172	0.003504	0.00264	0.001989	0.003952	0.003061	0.002371	0.005583	0.004264	0.003257	0.005256	0.003959	0.002983	0.005929	0.004591	0.003556
5.25	0.003942	0.003011	0.0023	0.003745	0.002821	0.002125	0.004147	0.003212	0.002488	0.003153	0.002409	0.00184	0.002996	0.002257	0.0017	0.003318	0.00257	0.00199	0.00473	0.003613	0.00276	0.004494	0.003386	0.002551	0.004977	0.003854	0.002985
5.35	0.003339	0.002551	0.001948	0.003202	0.002412	0.001817	0.003481	0.002696	0.002088	0.002672	0.002041	0.001559	0.002562	0.00193	0.001454	0.002785	0.002157	0.001671	0.004007	0.003061	0.002338	0.003843	0.002895	0.002181	0.004178	0.003236	0.002506
5.45	0.002829	0.002161	0.001651	0.002738	0.002063	0.001554	0.002923	0.002263	0.001753	0.002263	0.001729	0.001321	0.00219	0.00165	0.001243	0.002338	0.001811	0.001402	0.003395	0.002593	0.001981	0.003286	0.002475	0.001865	0.003507	0.002716	0.002104
5.55	0.002397	0.001831	0.001399	0.002341	0.001764	0.001329	0.002453	0.0019	0.001472	0.001918	0.001465	0.001119	0.001873	0.001411	0.001063	0.001963	0.00152	0.001177	0.002876	0.002197	0.001678	0.00281	0.002117	0.001595	0.002944	0.00228	0.001766
5.65	0.002031	0.001551	0.001185	0.002002	0.001508	0.001136	0.00206	0.001595	0.001235	0.001625	0.001241	0.0009479	0.001602	0.001207	0.0009089	0.001648	0.001276	0.0009882	0.002437	0.001861	0.001422	0.002402	0.00181	0.001363	0.002471	0.001914	0.001482
5.75	0.001721	0.001314	0.001004	0.001712	0.00129	0.0009715	0.001729	0.001339	0.001037	0.001376	0.001051	0.0008031	0.001369	0.001032	0.0007772	0.001383	0.001071	0.0008296	0.002065	0.001577	0.001205	0.002054	0.001547	0.001166	0.002075	0.001607	0.001244
5.85	0.001458	0.001113	0.0008505	0.001464	0.001103	0.0008307	0.001451	0.001124	0.0008705	0.001166	0.0008908	0.0006804	0.001171	0.0008821	0.0006646	0.001161	0.0008992	0.0006964	0.001749	0.001336	0.001021	0.001756	0.001323	0.0009969	0.001742	0.001349	0.001045
5.95	0.001235	0.0009433	0.0007206	0.001252	0.0009429	0.0007103	0.001218	0.0009435	0.0007307	0.000988	0.0007547	0.0005764	0.001001	0.0007543	0.0005682	0.0009747	0.0007548	0.0005846	0.001482	0.001132	0.0008647	0.001502	0.001131	0.0008524	0.001462	0.001132	0.0008769
6.05	0.001046	0.0007992	0.0006105	0.00107	0.0008062	0.0006074	0.001023	0.0007921	0.0006134	0.0008371	0.0006394	0.0004884	0.0008561	0.000645	0.0004859	0.0008182	0.0006337	0.0004907	0.001256	0.0009591	0.0007326	0.001284	0.0009675	0.0007288	0.001227	0.0009505	0.0007361
6.15	0.0008865	0.0006771	0.0005172	0.0009151	0.0006894	0.0005193	0.0008585	0.0006649	0.0005149	0.0007092	0.0005417	0.0004138	0.000732	0.0005515	0.0004155	0.0006868	0.0005319	0.000412	0.001064	0.0008126	0.0006207	0.001098	0.0008272	0.0006232	0.00103	0.0007979	0.0006179
6.25	0.0007511	0.0005737	0.0004382	0.0007824	0.0005895	0.0004441	0.0007207	0.0005582	0.0004323	0.0006008	0.0004589	0.0003506	0.0006259	0.0004716	0.0003553	0.0005766	0.0004465	0.0003458	0.0009013	0.0006884	0.0005258	0.0009389	0.0007073	0.0005329	0.0008649	0.0006698	0.0005187
6.35	0.0006363	0.000486	0.0003713	0.000669	0.000504	0.0003797	0.000605	0.0004686	0.0003629	0.0005091	0.0003888	0.000297	0.0005352	0.0004032	0.0003038	0.000484	0.0003748	0.0002903	0.0007636	0.0005832	0.0004455	0.0008028	0.0006048	0.0004556	0.000726	0.0005623	0.0004355
6.45	0.0005391	0.0004118	0.0003145	0.0005721	0.000431	0.0003247	0.0005079	0.0003933	0.0003046	0.0004313	0.0003294	0.0002516	0.0004577	0.0003448	0.0002597	0.0004063	0.0003147	0.0002437	0.0006469	0.0004941	0.0003774	0.0006865	0.0005172	0.0003896	0.0006095	0.000472	0.0003655
6.55	0.0004567	0.0003489	0.0002665	0.0004892	0.0003685	0.0002776	0.0004263	0.0003302	0.0002557	0.0003654	0.0002791	0.0002132	0.0003913	0.0002948	0.0002221	0.0003411	0.0002642	0.0002046	0.0005481	0.0004187	0.0003198	0.000587	0.0004422	0.0003331	0.0005116	0.0003962	0.0003069
6.65	0.000387	0.0002956	0.0002258	0.0004183	0.0003151	0.0002374	0.0003579	0.0002772	0.0002147	0.0003096	0.0002365	0.0001806	0.0003346	0.0002521	0.0001899	0.0002863	0.0002217	0.0001717	0.0004644	0.0003547	0.0002709	0.0005019	0.0003781	0.0002849	0.0004295	0.0003326	0.0002576
6.75	0.0007339	0.0002504	0.0001913	0.0007534	0.0002694	0.000203	0.000716	0.0002327	0.0001802	0.0005871	0.0002003	0.000153	0.0006027	0.0002155	0.0001624	0.0005728	0.0001861	0.0001442	0.0008807	0.0003005	0.0002295	0.000904	0.0003233	0.0002436	0.0008591	0.0002792	0.0002162
6.85	0.001663	0.0002122	0.0001621	0.001657	0.0002304	0.0001736	0.001667	0.0001953	0.0001513	0.00133	0.0001697	0.0001296	0.001326	0.0001843	0.0001388	0.001334	0.0001563	0.000121	0.001995	0.0002546	0.0001945	0.001989	0.0002765	0.0002083	0.002001	0.0002344	0.0001815
6.95	0.001663	0.0008306	0.0001373	0.001657	0.0008317	0.0001484	0.001667	0.0008296	0.000127	0.00133	0.0006645	0.0001098	0.001326	0.0006653	0.0001187	0.001334	0.0006637	0.0001016	0.001995	0.0009967	0.0001648	0.001989	0.000998	0.0001781	0.002001	0.0009956	0.0001524
7.05	0.001663	0.0009903	0.0002604	0.001657	0.0009872	0.0002673	0.001667	0.0009931	0.000254	0.00133	0.0007923	0.0002083	0.001326	0.0007898	0.0002138	0.001334	0.0007945	0.0002032	0.001995	0.001188	0.0003125	0.001989	0.001185	0.0003208	0.002001	0.001192	0.0003048
7.15	0.001663	0.0009903	0.0005899	0.001657	0.0009872	0.000588	0.001667	0.0009931	0.0005916	0.00133	0.0007923	0.0004719	0.001326	0.0007898	0.0004704	0.001334	0.0007945	0.0004733	0.001995	0.001188	0.0007079	0.001989	0.001185	0.0007056	0.002001	0.001192	0.0007099
7.25	0.001164	0.0009903	0.0005899	0.00116	0.0009872	0.000588	0.001167	0.0009931	0.0005916	0.000931	0.0007923	0.0004719	0.0009281	0.0007898	0.0004704	0.0009337	0.0007945	0.0004733	0.001397	0.001188	0.0007079	0.001392	0.001185	0.0007056	0.001401	0.001192	0.0007099
7.35	0	0.0009903	0.0005899	0	0.0009872	0.000588	0	0.0009931	0.0005916	0	0.0007923	0.0004719	0	0.0007898	0.0004704	0	0.0007945	0.0004733	0	0.001188	0.0007079	0	0.001185	0.0007056	0	0.001192	0.0007099
7.45	0	0.0001981	0.0005899	0	0.0001974	0.000588	0	0.0001986	0.0005916	0	0.0001584	0.0004719	0	0.000158	0.0004704	0	0.0001589	0.0004733	0	0.0002377	0.0007079	0	0.0002369	0.0007056	0	0.0002384	0.0007099
7.55	0	0	0.0004129	0	0	0.0004116	0	0	0.0004141	0	0	0.0003303	0	0	0.0003293	0	0	0.0003313	0	0	0.0004955	0	0	0.000494	0	0	0.0004969
Ganos (S6)	Weights /Earthquake Rates
Magnitude	0.0375	0.075	0.0375	0.0375	0.075	0.0375	0.05	0.1	0.05	0.01875	0.0375	0.01875	0.01875	0.0375	0.01875	0.025	0.05	0.025	0.01875	0.0375	0.01875	0.01875	0.0375	0.01875	0.025	0.05	0.025
4.05	0.05939	0.04568	0.03513	0.06972	0.05437	0.0424	0.06435	0.04984	0.0386	0.05627	0.04328	0.03329	0.06605	0.05151	0.04017	0.06097	0.04722	0.03657	0.06252	0.04809	0.03698	0.07339	0.05723	0.04463	0.06774	0.05246	0.04063
4.15	0.05009	0.03852	0.02963	0.05826	0.04543	0.03543	0.05402	0.04184	0.0324	0.04745	0.0365	0.02807	0.05519	0.04304	0.03356	0.05118	0.03964	0.0307	0.05272	0.04055	0.03119	0.06133	0.04782	0.03729	0.05686	0.04404	0.03411
4.25	0.04224	0.03249	0.02499	0.04868	0.03796	0.02961	0.04535	0.03512	0.0272	0.04002	0.03078	0.02367	0.04612	0.03597	0.02805	0.04296	0.03327	0.02577	0.04446	0.0342	0.0263	0.05124	0.03996	0.03116	0.04774	0.03697	0.02863
4.35	0.03562	0.0274	0.02107	0.04068	0.03172	0.02474	0.03807	0.02948	0.02283	0.03375	0.02596	0.01996	0.03854	0.03005	0.02344	0.03607	0.02793	0.02163	0.0375	0.02884	0.02218	0.04282	0.03339	0.02604	0.04007	0.03103	0.02404
4.45	0.03004	0.02311	0.01777	0.03399	0.02651	0.02067	0.03196	0.02475	0.01917	0.02846	0.02189	0.01684	0.0322	0.02511	0.01958	0.03028	0.02345	0.01816	0.03162	0.02432	0.01871	0.03578	0.0279	0.02176	0.03364	0.02605	0.02018
4.55	0.02534	0.01949	0.01499	0.0284	0.02215	0.01727	0.02683	0.02078	0.01609	0.024	0.01846	0.0142	0.02691	0.02098	0.01636	0.02541	0.01968	0.01524	0.02667	0.02051	0.01578	0.0299	0.02332	0.01818	0.02824	0.02187	0.01694
4.65	0.02137	0.01643	0.01264	0.02373	0.01851	0.01443	0.02252	0.01744	0.01351	0.02024	0.01557	0.01197	0.02248	0.01753	0.01367	0.02133	0.01652	0.0128	0.02249	0.0173	0.0133	0.02498	0.01948	0.01519	0.02371	0.01836	0.01422
4.75	0.01802	0.01386	0.01066	0.01983	0.01547	0.01206	0.0189	0.01464	0.01134	0.01707	0.01313	0.0101	0.01879	0.01465	0.01143	0.01791	0.01387	0.01074	0.01897	0.01459	0.01122	0.02088	0.01628	0.0127	0.0199	0.01541	0.01194
4.85	0.0152	0.01169	0.00899	0.01657	0.01292	0.01008	0.01587	0.01229	0.009519	0.0144	0.01107	0.008516	0.0157	0.01224	0.009547	0.01503	0.01164	0.009018	0.016	0.0123	0.009463	0.01744	0.0136	0.01061	0.0167	0.01294	0.01002
4.95	0.01282	0.009857	0.007581	0.01385	0.0108	0.008421	0.01332	0.01032	0.00799	0.01214	0.009338	0.007182	0.01312	0.01023	0.007978	0.01262	0.009774	0.00757	0.01349	0.01038	0.00798	0.01458	0.01137	0.008864	0.01402	0.01086	0.008411
5.05	0.01081	0.008313	0.006393	0.01157	0.009023	0.007037	0.01118	0.008661	0.006708	0.01024	0.007875	0.006057	0.01096	0.008548	0.006666	0.01059	0.008205	0.006355	0.01138	0.00875	0.00673	0.01218	0.009498	0.007407	0.01177	0.009117	0.007061
5.15	0.009115	0.00701	0.005392	0.009669	0.00754	0.00588	0.009388	0.007271	0.005631	0.008635	0.006641	0.005108	0.00916	0.007143	0.00557	0.008894	0.006888	0.005334	0.009594	0.007379	0.005676	0.01018	0.007937	0.006189	0.009882	0.007653	0.005927
5.25	0.007687	0.005912	0.004547	0.008079	0.0063	0.004913	0.007881	0.006103	0.004727	0.007282	0.005601	0.004308	0.007654	0.005969	0.004655	0.007466	0.005782	0.004478	0.008091	0.006223	0.004786	0.008504	0.006632	0.005172	0.008296	0.006425	0.004976
5.35	0.006482	0.004986	0.003835	0.006751	0.005265	0.004106	0.006616	0.005124	0.003968	0.006141	0.004723	0.003633	0.006396	0.004988	0.003889	0.006267	0.004854	0.003759	0.006824	0.005248	0.004037	0.007106	0.005542	0.004322	0.006964	0.005393	0.004177
5.45	0.005467	0.004205	0.003234	0.005641	0.004399	0.003431	0.005554	0.004301	0.003331	0.005179	0.003983	0.003064	0.005344	0.004168	0.00325	0.005261	0.004075	0.003156	0.005755	0.004426	0.003404	0.005938	0.004631	0.003611	0.005846	0.004527	0.003506
5.55	0.00461	0.003546	0.002727	0.004714	0.003676	0.002867	0.004662	0.003611	0.002796	0.004368	0.003359	0.002584	0.004466	0.003482	0.002716	0.004417	0.00342	0.002649	0.004853	0.003733	0.002871	0.004962	0.003869	0.003017	0.004907	0.003801	0.002943
5.65	0.003888	0.00299	0.0023	0.003939	0.003072	0.002395	0.003914	0.003031	0.002347	0.003683	0.002833	0.002179	0.003732	0.00291	0.002269	0.003708	0.002871	0.002224	0.004093	0.003148	0.002421	0.004146	0.003233	0.002521	0.00412	0.00319	0.002471
5.75	0.003279	0.002522	0.00194	0.003291	0.002567	0.002002	0.003285	0.002544	0.00197	0.003106	0.002389	0.001838	0.003118	0.002432	0.001896	0.003112	0.00241	0.001867	0.003452	0.002655	0.002042	0.003465	0.002702	0.002107	0.003458	0.002678	0.002074
5.85	0.002765	0.002127	0.001636	0.00275	0.002145	0.001673	0.002758	0.002136	0.001654	0.00262	0.002015	0.00155	0.002605	0.002032	0.001584	0.002613	0.002023	0.001567	0.002911	0.002239	0.001722	0.002895	0.002258	0.001761	0.002903	0.002248	0.001741
5.95	0.002332	0.001794	0.00138	0.002298	0.001792	0.001398	0.002315	0.001793	0.001389	0.002209	0.001699	0.001307	0.002177	0.001698	0.001324	0.002193	0.001699	0.001315	0.002455	0.001888	0.001452	0.002419	0.001886	0.001471	0.002437	0.001887	0.001462
6.05	0.001967	0.001513	0.001163	0.00192	0.001497	0.001168	0.001943	0.001505	0.001166	0.001863	0.001433	0.001102	0.001819	0.001419	0.001106	0.001841	0.001426	0.001104	0.00207	0.001592	0.001225	0.002021	0.001576	0.001229	0.002046	0.001584	0.001227
6.15	0.001659	0.001276	0.0009812	0.001605	0.001251	0.0009758	0.001631	0.001263	0.0009785	0.001571	0.001209	0.0009295	0.00152	0.001185	0.0009245	0.001546	0.001197	0.000927	0.001746	0.001343	0.001033	0.001689	0.001317	0.001027	0.001717	0.00133	0.00103
6.25	0.001399	0.001076	0.0008274	0.001341	0.001046	0.0008154	0.00137	0.001061	0.0008214	0.001325	0.001019	0.0007839	0.00127	0.0009906	0.0007725	0.001297	0.001005	0.0007782	0.001472	0.001132	0.000871	0.001411	0.001101	0.0008583	0.001442	0.001116	0.0008647
6.35	0.00118	0.0009073	0.0006978	0.00112	0.0008737	0.0006813	0.00115	0.0008904	0.0006896	0.001118	0.0008595	0.0006611	0.001061	0.0008277	0.0006455	0.001089	0.0008435	0.0006533	0.001242	0.000955	0.0007345	0.001179	0.0009197	0.0007172	0.00121	0.0009372	0.0007258
6.45	0.0009948	0.0007651	0.0005885	0.0009362	0.0007301	0.0005693	0.0009651	0.0007474	0.0005789	0.0009424	0.0007249	0.0005575	0.0008869	0.0006916	0.0005394	0.0009143	0.0007081	0.0005484	0.001047	0.0008054	0.0006195	0.0009855	0.0007685	0.0005993	0.001016	0.0007868	0.0006093
6.55	0.000839	0.0006453	0.0004963	0.0007823	0.0006101	0.0004757	0.0008102	0.0006274	0.0004859	0.0007948	0.0006113	0.0004702	0.0007411	0.0005779	0.0004507	0.0007675	0.0005944	0.0004603	0.0008831	0.0006792	0.0005224	0.0008235	0.0006422	0.0005008	0.0008528	0.0006605	0.0005115
6.65	0.0007075	0.0005442	0.0004185	0.0006537	0.0005098	0.0003975	0.0006801	0.0005267	0.0004079	0.0006703	0.0005155	0.0003965	0.0006193	0.0004829	0.0003766	0.0006443	0.000499	0.0003864	0.0007448	0.0005728	0.0004406	0.0006881	0.0005366	0.0004184	0.0007159	0.0005544	0.0004294
6.75	0.001658	0.0004589	0.000353	0.001631	0.000426	0.0003322	0.001644	0.0004421	0.0003424	0.001571	0.0004348	0.0003344	0.001545	0.0004035	0.0003147	0.001558	0.0004189	0.0003244	0.001745	0.0004831	0.0003715	0.001717	0.0004484	0.0003497	0.001731	0.0004654	0.0003605
6.85	0.00322	0.000387	0.0002977	0.003228	0.0003559	0.0002776	0.003224	0.0003712	0.0002875	0.00305	0.0003667	0.000282	0.003058	0.0003372	0.000263	0.003054	0.0003516	0.0002723	0.003389	0.0004074	0.0003133	0.003398	0.0003747	0.0002922	0.003394	0.0003907	0.0003026
6.95	0.00322	0.001761	0.000251	0.003228	0.001763	0.0002319	0.003224	0.001762	0.0002413	0.00305	0.001669	0.0002378	0.003058	0.00167	0.0002197	0.003054	0.001669	0.0002286	0.003389	0.001854	0.0002643	0.003398	0.001856	0.0002441	0.003394	0.001855	0.000254
7.05	0.00322	0.001918	0.0005883	0.003228	0.001923	0.0005786	0.003224	0.00192	0.0005834	0.00305	0.001817	0.0005573	0.003058	0.001822	0.0005482	0.003054	0.001819	0.0005527	0.003389	0.002019	0.0006192	0.003398	0.002024	0.0006091	0.003394	0.002022	0.0006141
7.15	0.00322	0.001918	0.001142	0.003228	0.001923	0.001145	0.003224	0.00192	0.001144	0.00305	0.001817	0.001082	0.003058	0.001822	0.001085	0.003054	0.001819	0.001084	0.003389	0.002019	0.001203	0.003398	0.002024	0.001206	0.003394	0.002022	0.001204
7.25	0.001932	0.001918	0.001142	0.001937	0.001923	0.001145	0.001934	0.00192	0.001144	0.00183	0.001817	0.001082	0.001835	0.001822	0.001085	0.001833	0.001819	0.001084	0.002033	0.002019	0.001203	0.002039	0.002024	0.001206	0.002036	0.002022	0.001204
7.35	0	0.001918	0.001142	0	0.001923	0.001145	0	0.00192	0.001144	0	0.001817	0.001082	0	0.001822	0.001085	0	0.001819	0.001084	0	0.002019	0.001203	0	0.002024	0.001206	0	0.002022	0.001204
7.45	0	0.0001918	0.001142	0	0.0001923	0.001145	0	0.000192	0.001144	0	0.0001817	0.001082	0	0.0001822	0.001085	0	0.0001819	0.001084	0	0.0002019	0.001203	0	0.0002024	0.001206	0	0.0002022	0.001204
7.55	0	0	0.0006854	0	0	0.0006873	0	0	0.0006864	0	0	0.0006494	0	0	0.0006511	0	0	0.0006503	0	0	0.0007215	0	0	0.0007235	0	0	0.0007225
Saros (S7)	Weights /Earthquake Rates
Magnitude	0.0375	0.075	0.0375	0.0375	0.075	0.0375	0.05	0.1	0.05	0.01875	0.0375	0.01875	0.01875	0.0375	0.01875	0.025	0.05	0.025	0.01875	0.0375	0.01875	0.01875	0.0375	0.01875	0.025	0.05	0.025
4.05	0.05591	0.04301	0.03308	0.06426	0.05011	0.03908	0.05995	0.04643	0.03595	0.05297	0.04074	0.03134	0.06088	0.04748	0.03702	0.05679	0.04398	0.03406	0.05886	0.04527	0.03482	0.06764	0.05275	0.04114	0.0631	0.04887	0.03785
4.15	0.04716	0.03627	0.0279	0.0537	0.04188	0.03266	0.05032	0.03897	0.03018	0.04467	0.03436	0.02643	0.05087	0.03967	0.03094	0.04767	0.03692	0.02859	0.04964	0.03818	0.02936	0.05652	0.04408	0.03437	0.05297	0.04102	0.03177
4.25	0.03977	0.03059	0.02352	0.04487	0.03499	0.02729	0.04224	0.03272	0.02534	0.03767	0.02898	0.02229	0.04251	0.03315	0.02585	0.04002	0.03099	0.024	0.04186	0.0322	0.02476	0.04723	0.03683	0.02872	0.04447	0.03444	0.02667
4.35	0.03354	0.02579	0.01984	0.03749	0.02924	0.0228	0.03546	0.02746	0.02127	0.03177	0.02444	0.0188	0.03552	0.0277	0.0216	0.0336	0.02602	0.02015	0.0353	0.02715	0.02088	0.03947	0.03078	0.024	0.03733	0.02891	0.02239
4.45	0.02828	0.02175	0.01673	0.03133	0.02443	0.01905	0.02977	0.02305	0.01785	0.02679	0.02061	0.01585	0.02968	0.02315	0.01805	0.0282	0.02184	0.01692	0.02977	0.0229	0.01761	0.03298	0.02572	0.02006	0.03134	0.02427	0.01879
4.55	0.02385	0.01835	0.01411	0.02618	0.02042	0.01592	0.02499	0.01935	0.01499	0.0226	0.01738	0.01337	0.0248	0.01934	0.01508	0.02367	0.01833	0.0142	0.02511	0.01931	0.01485	0.02756	0.02149	0.01676	0.0263	0.02037	0.01578
4.65	0.02012	0.01547	0.0119	0.02188	0.01706	0.0133	0.02098	0.01625	0.01258	0.01906	0.01466	0.01127	0.02072	0.01616	0.0126	0.01987	0.01539	0.01192	0.02117	0.01629	0.01253	0.02303	0.01796	0.014	0.02208	0.0171	0.01324
4.75	0.01696	0.01305	0.01004	0.01828	0.01425	0.01112	0.01761	0.01364	0.01056	0.01607	0.01236	0.009507	0.01732	0.0135	0.01053	0.01668	0.01292	0.01001	0.01786	0.01373	0.01056	0.01924	0.015	0.0117	0.01854	0.01436	0.01112
4.85	0.01431	0.011	0.008463	0.01527	0.01191	0.009289	0.01478	0.01145	0.008867	0.01355	0.01042	0.008018	0.01447	0.01128	0.0088	0.014	0.01085	0.0084	0.01506	0.01158	0.008909	0.01608	0.01254	0.009778	0.01556	0.01205	0.009333
4.95	0.01207	0.00928	0.007137	0.01276	0.009953	0.007762	0.01241	0.009611	0.007443	0.01143	0.008791	0.006762	0.01209	0.009429	0.007353	0.01176	0.009105	0.007051	0.0127	0.009768	0.007513	0.01343	0.01048	0.00817	0.01306	0.01012	0.007835
5.05	0.01017	0.007826	0.006019	0.01066	0.008317	0.006486	0.01042	0.008068	0.006248	0.009639	0.007414	0.005702	0.0101	0.007879	0.006144	0.009869	0.007643	0.005919	0.01071	0.008238	0.006336	0.01123	0.008755	0.006827	0.01097	0.008492	0.006577
5.15	0.008581	0.0066	0.005076	0.008912	0.00695	0.005419	0.008745	0.006773	0.005245	0.008129	0.006252	0.004809	0.008443	0.006584	0.005134	0.008285	0.006416	0.004969	0.009032	0.006947	0.005343	0.009381	0.007315	0.005705	0.009205	0.007129	0.005521
5.25	0.007236	0.005566	0.004281	0.007447	0.005807	0.004529	0.007341	0.005685	0.004403	0.006856	0.005273	0.004056	0.007055	0.005501	0.00429	0.006955	0.005386	0.004171	0.007617	0.005859	0.004506	0.007839	0.006113	0.004767	0.007727	0.005985	0.004635
5.35	0.006103	0.004694	0.00361	0.006222	0.004852	0.003784	0.006163	0.004773	0.003696	0.005782	0.004447	0.00342	0.005895	0.004597	0.003585	0.005838	0.004521	0.003502	0.006424	0.004941	0.0038	0.00655	0.005108	0.003983	0.006487	0.005024	0.003891
5.45	0.005147	0.003958	0.003045	0.005199	0.004055	0.003162	0.005173	0.004006	0.003103	0.004876	0.00375	0.002884	0.004926	0.003841	0.002996	0.004901	0.003796	0.00294	0.005418	0.004167	0.003205	0.005473	0.004268	0.003328	0.005445	0.004217	0.003266
5.55	0.00434	0.003338	0.002568	0.004345	0.003388	0.002642	0.004343	0.003363	0.002605	0.004112	0.003163	0.002432	0.004116	0.00321	0.002503	0.004114	0.003186	0.002468	0.004569	0.003514	0.002703	0.004573	0.003566	0.002781	0.004571	0.00354	0.002742
5.65	0.00366	0.002815	0.002165	0.00363	0.002831	0.002208	0.003646	0.002823	0.002187	0.003468	0.002667	0.002051	0.003439	0.002682	0.002092	0.003454	0.002675	0.002071	0.003853	0.002963	0.002279	0.003821	0.00298	0.002324	0.003837	0.002972	0.002302
5.75	0.003087	0.002374	0.001826	0.003034	0.002366	0.001845	0.00306	0.00237	0.001836	0.002924	0.002249	0.00173	0.002874	0.002241	0.001748	0.002899	0.002245	0.001739	0.003249	0.002499	0.001922	0.003193	0.00249	0.001942	0.003221	0.002495	0.001932
5.85	0.002603	0.002002	0.00154	0.002535	0.001977	0.001542	0.002569	0.00199	0.001541	0.002466	0.001897	0.001459	0.002401	0.001873	0.00146	0.002434	0.001885	0.00146	0.00274	0.002108	0.001621	0.002668	0.002081	0.001623	0.002704	0.002094	0.001622
5.95	0.002195	0.001689	0.001299	0.002118	0.001652	0.001288	0.002157	0.00167	0.001293	0.00208	0.0016	0.00123	0.002007	0.001565	0.00122	0.002043	0.001582	0.001225	0.002311	0.001777	0.001367	0.00223	0.001739	0.001356	0.00227	0.001758	0.001362
6.05	0.001852	0.001424	0.001095	0.00177	0.00138	0.001076	0.00181	0.001402	0.001086	0.001754	0.001349	0.001038	0.001677	0.001308	0.00102	0.001715	0.001328	0.001029	0.001949	0.001499	0.001153	0.001863	0.001453	0.001133	0.001906	0.001476	0.001143
6.15	0.001561	0.001201	0.0009237	0.001479	0.001153	0.0008994	0.00152	0.001177	0.0009115	0.001479	0.001138	0.0008751	0.001401	0.001093	0.0008521	0.00144	0.001115	0.0008635	0.001644	0.001264	0.0009723	0.001557	0.001214	0.0009467	0.0016	0.001239	0.0009595
6.25	0.001317	0.001013	0.000779	0.001236	0.0009637	0.0007515	0.001276	0.000988	0.0007652	0.001248	0.0009595	0.000738	0.001171	0.000913	0.000712	0.001209	0.000936	0.0007249	0.001386	0.001066	0.00082	0.001301	0.001014	0.0007911	0.001343	0.00104	0.0008054
6.35	0.001111	0.0008541	0.0006569	0.001033	0.0008053	0.000628	0.001071	0.0008294	0.0006423	0.001052	0.0008092	0.0006224	0.0009783	0.0007629	0.0005949	0.001015	0.0007857	0.0006085	0.001169	0.0008991	0.0006915	0.001087	0.0008477	0.000661	0.001127	0.000873	0.0006761
6.45	0.0009365	0.0007203	0.000554	0.0008629	0.0006729	0.0005248	0.000899	0.0006962	0.0005392	0.0008873	0.0006824	0.0005249	0.0008175	0.0006375	0.0004971	0.0008517	0.0006596	0.0005108	0.0009858	0.0007582	0.0005832	0.0009083	0.0007083	0.0005524	0.0009463	0.0007329	0.0005676
6.55	0.003391	0.0006075	0.0004672	0.003378	0.0005623	0.0004385	0.003385	0.0005845	0.0004526	0.003213	0.0005755	0.0004426	0.003201	0.0005327	0.0004154	0.003206	0.0005537	0.0004288	0.003569	0.0006394	0.0004918	0.003556	0.0005919	0.0004616	0.003563	0.0006152	0.0004765
6.65	0.004485	0.0009511	0.000394	0.004498	0.0009183	0.0003664	0.004492	0.0009344	0.00038	0.004249	0.000901	0.0003733	0.004261	0.00087	0.0003471	0.004255	0.0008852	0.00036	0.004721	0.001001	0.0004148	0.004734	0.0009666	0.0003857	0.004728	0.0009835	0.0004
6.75	0.004485	0.002672	0.0003323	0.004498	0.002679	0.0003062	0.004492	0.002675	0.000319	0.004249	0.002531	0.0003148	0.004261	0.002538	0.0002901	0.004255	0.002535	0.0003022	0.004721	0.002812	0.0003498	0.004734	0.00282	0.0003223	0.004728	0.002816	0.0003358
6.85	0.004485	0.002672	0.001203	0.004498	0.002679	0.001199	0.004492	0.002675	0.001201	0.004249	0.002531	0.00114	0.004261	0.002538	0.001136	0.004255	0.002535	0.001138	0.004721	0.002812	0.001267	0.004734	0.00282	0.001262	0.004728	0.002816	0.001264
6.95	0.004485	0.002672	0.001591	0.004498	0.002679	0.001596	0.004492	0.002675	0.001594	0.004249	0.002531	0.001508	0.004261	0.002538	0.001512	0.004255	0.002535	0.00151	0.004721	0.002812	0.001675	0.004734	0.00282	0.00168	0.004728	0.002816	0.001678
7.05	0.001346	0.002672	0.001591	0.001349	0.002679	0.001596	0.001347	0.002675	0.001594	0.001275	0.002531	0.001508	0.001278	0.002538	0.001512	0.001277	0.002535	0.00151	0.001416	0.002812	0.001675	0.00142	0.00282	0.00168	0.001418	0.002816	0.001678
7.15	0	0.002137	0.001591	0	0.002143	0.001596	0	0.00214	0.001594	0	0.002025	0.001508	0	0.00203	0.001512	0	0.002028	0.00151	0	0.00225	0.001675	0	0.002256	0.00168	0	0.002253	0.001678
7.25	0	0	0.001591	0	0	0.001596	0	0	0.001594	0	0	0.001508	0	0	0.001512	0	0	0.00151	0	0	0.001675	0	0	0.00168	0	0	0.001678
7.35	0	0	0.0004774	0	0	0.0004787	0	0	0.0004781	0	0	0.0004523	0	0	0.0004535	0	0	0.0004529	0	0	0.0005026	0	0	0.0005039	0	0	0.0005033
Ganos+Saros (S6+S7)		Weights /Earthquake Rates
Magnitude	0.0375	0.075	0.0375	0.0375	0.075	0.0375	0.05	0.1	0.05	0.01875	0.0375	0.01875	0.01875	0.0375	0.01875	0.025	0.05	0.025	0.01875	0.0375	0.01875	0.01875	0.0375	0.01875	0.025	0.05	0.025
4.05	0.06359	0.04891	0.03762	0.07632	0.05951	0.04641	0.06967	0.05395	0.04178	0.06024	0.04634	0.03564	0.0723	0.05638	0.04397	0.066	0.05111	0.03959	0.06694	0.05148	0.0396	0.08033	0.06265	0.04885	0.07333	0.05679	0.04398
4.15	0.05363	0.04125	0.03172	0.06377	0.04973	0.03878	0.05848	0.04529	0.03508	0.05081	0.03908	0.03005	0.06041	0.04711	0.03674	0.0554	0.04291	0.03323	0.05645	0.04342	0.03339	0.06713	0.05235	0.04082	0.06156	0.04768	0.03692
4.25	0.04523	0.03478	0.02675	0.05329	0.04155	0.03241	0.04909	0.03802	0.02945	0.04285	0.03295	0.02535	0.05048	0.03937	0.0307	0.04651	0.03602	0.0279	0.04761	0.03662	0.02816	0.05609	0.04374	0.03411	0.05168	0.04002	0.031
4.35	0.03814	0.02934	0.02256	0.04453	0.03472	0.02708	0.04121	0.03192	0.02472	0.03613	0.02779	0.02138	0.04218	0.0329	0.02565	0.03904	0.03024	0.02342	0.04015	0.03088	0.02375	0.04687	0.03655	0.0285	0.04338	0.0336	0.02602
4.45	0.03217	0.02474	0.01903	0.03721	0.02901	0.02263	0.0346	0.02679	0.02075	0.03047	0.02344	0.01803	0.03525	0.02749	0.02144	0.03277	0.02538	0.01966	0.03386	0.02604	0.02003	0.03916	0.03054	0.02382	0.03642	0.0282	0.02184
4.55	0.02713	0.02086	0.01605	0.03109	0.02424	0.01891	0.02904	0.02249	0.01742	0.0257	0.01977	0.0152	0.02945	0.02297	0.01791	0.02751	0.02131	0.0165	0.02855	0.02196	0.01689	0.03273	0.02552	0.0199	0.03057	0.02368	0.01834
4.65	0.02288	0.0176	0.01353	0.02598	0.02026	0.0158	0.02438	0.01888	0.01462	0.02167	0.01667	0.01282	0.02461	0.01919	0.01497	0.0231	0.01789	0.01385	0.02408	0.01852	0.01425	0.02735	0.02133	0.01663	0.02566	0.01987	0.01539
4.75	0.01929	0.01484	0.01141	0.02171	0.01693	0.0132	0.02047	0.01585	0.01227	0.01828	0.01406	0.01081	0.02057	0.01604	0.01251	0.01939	0.01502	0.01163	0.02031	0.01562	0.01201	0.02285	0.01782	0.0139	0.02154	0.01668	0.01292
4.85	0.01627	0.01251	0.009625	0.01814	0.01415	0.01103	0.01718	0.01331	0.0103	0.01541	0.01186	0.009118	0.01718	0.0134	0.01045	0.01628	0.0126	0.009762	0.01713	0.01317	0.01013	0.01909	0.01489	0.01161	0.01808	0.01401	0.01085
4.95	0.01372	0.01055	0.008117	0.01516	0.01182	0.009218	0.01442	0.01117	0.00865	0.013	0.009998	0.00769	0.01436	0.0112	0.008732	0.01366	0.01058	0.008195	0.01444	0.01111	0.008544	0.01595	0.01244	0.009703	0.01518	0.01176	0.009105
5.05	0.01157	0.0089	0.006845	0.01267	0.009877	0.007702	0.01211	0.009376	0.007261	0.01096	0.008432	0.006485	0.012	0.009357	0.007297	0.01147	0.008883	0.006879	0.01218	0.009368	0.007206	0.01333	0.0104	0.008108	0.01274	0.00987	0.007644
5.15	0.009759	0.007506	0.005773	0.01058	0.008253	0.006436	0.01016	0.007871	0.006096	0.009245	0.007111	0.005469	0.01003	0.007819	0.006097	0.009628	0.007457	0.005775	0.01027	0.007901	0.006077	0.01114	0.008688	0.006775	0.0107	0.008285	0.006416
5.25	0.00823	0.00633	0.004868	0.008843	0.006896	0.005378	0.008531	0.006607	0.005117	0.007797	0.005997	0.004612	0.008378	0.006533	0.005095	0.008082	0.006259	0.004848	0.008663	0.006663	0.005125	0.009309	0.007259	0.005661	0.00898	0.006955	0.005386
5.35	0.00694	0.005338	0.004106	0.00739	0.005763	0.004494	0.007162	0.005547	0.004296	0.006575	0.005057	0.00389	0.007001	0.005459	0.004257	0.006785	0.005255	0.004069	0.007306	0.005619	0.004322	0.007778	0.006066	0.00473	0.007539	0.005838	0.004522
5.45	0.005853	0.004502	0.003463	0.006175	0.004815	0.003755	0.006012	0.004656	0.003606	0.005545	0.004265	0.00328	0.00585	0.004562	0.003557	0.005696	0.004411	0.003416	0.006161	0.004739	0.003645	0.0065	0.005069	0.003953	0.006328	0.004901	0.003796
5.55	0.004936	0.003797	0.00292	0.00516	0.004024	0.003138	0.005047	0.003909	0.003027	0.004676	0.003597	0.002766	0.004888	0.003812	0.002973	0.004781	0.003703	0.002868	0.005196	0.003996	0.003074	0.005431	0.004235	0.003303	0.005312	0.004114	0.003186
5.65	0.004163	0.003202	0.002463	0.004311	0.003362	0.002622	0.004237	0.003281	0.002541	0.003944	0.003033	0.002333	0.004084	0.003185	0.002484	0.004014	0.003108	0.002407	0.004382	0.00337	0.002592	0.004538	0.003539	0.00276	0.00446	0.003454	0.002675
5.75	0.003511	0.0027	0.002077	0.003603	0.002809	0.002191	0.003556	0.002754	0.002133	0.003326	0.002558	0.001967	0.003413	0.002662	0.002076	0.003369	0.002609	0.002021	0.003695	0.002842	0.002186	0.003792	0.002957	0.002306	0.003744	0.002899	0.002245
5.85	0.002961	0.002277	0.001751	0.00301	0.002348	0.001831	0.002986	0.002312	0.001791	0.002805	0.002157	0.001659	0.002852	0.002224	0.001734	0.002828	0.00219	0.001696	0.003116	0.002397	0.001844	0.003169	0.002471	0.001927	0.003143	0.002434	0.001885
5.95	0.002497	0.00192	0.001477	0.002515	0.001962	0.00153	0.002506	0.001941	0.001503	0.002365	0.001819	0.001399	0.002383	0.001858	0.001449	0.002374	0.001839	0.001424	0.002628	0.002021	0.001555	0.002648	0.002065	0.00161	0.002638	0.002043	0.001582
6.05	0.002106	0.00162	0.001246	0.002102	0.001639	0.001278	0.002104	0.001629	0.001262	0.001995	0.001534	0.00118	0.001991	0.001553	0.001211	0.001993	0.001544	0.001195	0.002216	0.001705	0.001311	0.002213	0.001725	0.001346	0.002215	0.001715	0.001328
6.15	0.001776	0.001366	0.00105	0.001756	0.00137	0.001068	0.001766	0.001368	0.001059	0.001682	0.001294	0.0009952	0.001664	0.001298	0.001012	0.001673	0.001296	0.001004	0.001869	0.001438	0.001106	0.001849	0.001442	0.001124	0.001859	0.00144	0.001115
6.25	0.001498	0.001152	0.0008859	0.001468	0.001145	0.0008925	0.001483	0.001148	0.0008892	0.001419	0.001091	0.0008393	0.00139	0.001084	0.0008455	0.001405	0.001088	0.0008424	0.001576	0.001212	0.0009325	0.001545	0.001205	0.0009395	0.001561	0.001209	0.000936
6.35	0.001263	0.0009714	0.0007471	0.001226	0.0009564	0.0007458	0.001245	0.0009639	0.0007465	0.001196	0.0009203	0.0007078	0.001162	0.000906	0.0007065	0.001179	0.0009131	0.0007072	0.001329	0.001023	0.0007864	0.001291	0.001007	0.000785	0.00131	0.001015	0.0007858
6.45	0.001065	0.0008192	0.0006301	0.001025	0.0007991	0.0006232	0.001045	0.0008091	0.0006266	0.001009	0.0007761	0.0005969	0.0009708	0.0007571	0.0005904	0.0009898	0.0007665	0.0005937	0.001121	0.0008623	0.0006632	0.001079	0.0008412	0.000656	0.0011	0.0008517	0.0006596
6.55	0.0008982	0.0006909	0.0005314	0.0008563	0.0006678	0.0005207	0.000877	0.0006792	0.000526	0.000851	0.0006545	0.0005034	0.0008112	0.0006326	0.0004933	0.0008309	0.0006435	0.0004984	0.0009455	0.0007272	0.0005593	0.0009014	0.0007029	0.0005481	0.0009232	0.000715	0.0005537
6.65	0.0007575	0.0005826	0.0004481	0.0007155	0.000558	0.0004351	0.0007362	0.0005702	0.0004416	0.0007176	0.000552	0.0004245	0.0006779	0.0005286	0.0004122	0.0006975	0.0005402	0.0004183	0.0007974	0.0006133	0.0004717	0.0007532	0.0005873	0.000458	0.000775	0.0006002	0.0004648
6.75	0.0006388	0.0004913	0.0003779	0.0005979	0.0004662	0.0003636	0.000618	0.0004787	0.0003707	0.0006052	0.0004655	0.000358	0.0005664	0.0004417	0.0003445	0.0005855	0.0004535	0.0003512	0.0006725	0.0005172	0.0003978	0.0006294	0.0004908	0.0003827	0.0006506	0.0005038	0.0003902
6.85	0.0005388	0.0004144	0.0003187	0.0004996	0.0003896	0.0003038	0.0005188	0.0004018	0.0003112	0.0005104	0.0003926	0.0003019	0.0004733	0.0003691	0.0002878	0.0004915	0.0003807	0.0002948	0.0005671	0.0004362	0.0003355	0.0005259	0.0004101	0.0003198	0.0005461	0.000423	0.0003276
6.95	0.0004544	0.0003495	0.0002688	0.0004175	0.0003256	0.0002539	0.0004355	0.0003373	0.0002612	0.0004304	0.0003311	0.0002546	0.0003955	0.0003084	0.0002405	0.0004126	0.0003196	0.0002475	0.0004783	0.0003678	0.0002829	0.0004394	0.0003427	0.0002672	0.0004585	0.0003551	0.000275
7.05	0.00229	0.0002947	0.0002267	0.002296	0.000272	0.0002121	0.002293	0.0002832	0.0002193	0.00217	0.0002792	0.0002147	0.002175	0.0002577	0.000201	0.002173	0.0002682	0.0002077	0.002411	0.0003102	0.0002386	0.002417	0.0002863	0.0002233	0.002414	0.0002981	0.0002308
7.15	0.00229	0.0008116	0.0001912	0.002296	0.0008027	0.0001773	0.002293	0.0008071	0.0001841	0.00217	0.0007689	0.0001811	0.002175	0.0007604	0.0001679	0.002173	0.0007646	0.0001744	0.002411	0.0008544	0.0002012	0.002417	0.0008449	0.0001866	0.002414	0.0008495	0.0001938
7.25	0.00229	0.001364	0.0001612	0.002296	0.001368	0.0001481	0.002293	0.001366	0.0001545	0.00217	0.001292	0.0001527	0.002175	0.001296	0.0001403	0.002173	0.001294	0.0001464	0.002411	0.001436	0.0001697	0.002417	0.00144	0.0001559	0.002414	0.001438	0.0001627
7.35	0.00229	0.001364	0.0008126	0.002296	0.001368	0.0008148	0.002293	0.001366	0.0008137	0.00217	0.001292	0.0007698	0.002175	0.001296	0.0007719	0.002173	0.001294	0.0007709	0.002411	0.001436	0.0008553	0.002417	0.00144	0.0008576	0.002414	0.001438	0.0008565
7.45	0.00229	0.001364	0.0008126	0.002296	0.001368	0.0008148	0.002293	0.001366	0.0008137	0.00217	0.001292	0.0007698	0.002175	0.001296	0.0007719	0.002173	0.001294	0.0007709	0.002411	0.001436	0.0008553	0.002417	0.00144	0.0008576	0.002414	0.001438	0.0008565
7.55	0	0.001364	0.0008126	0	0.001368	0.0008148	0	0.001366	0.0008137	0	0.001292	0.0007698	0	0.001296	0.0007719	0	0.001294	0.0007709	0	0.001436	0.0008553	0	0.00144	0.0008576	0	0.001438	0.0008565
7.65	0	0.0006821	0.0008126	0	0.0006839	0.0008148	0	0.000683	0.0008137	0	0.0006462	0.0007698	0	0.0006479	0.0007719	0	0.0006471	0.0007709	0	0.000718	0.0008553	0	0.0007199	0.0008576	0	0.000719	0.0008565
7.75	0	0	0.0008126	0	0	0.0008148	0	0	0.0008137	0	0	0.0007698	0	0	0.0007719	0	0	0.0007709	0	0	0.0008553	0	0	0.0008577	0	0	0.0008565
Center (S4)	Weights /Earthquake Rates
Magnitude	0.0375	0.075	0.0375	0.0375	0.075	0.0375	0.05	0.1	0.05	0.01875	0.0375	0.01875	0.01875	0.0375	0.01875	0.025	0.05	0.025	0.01875	0.0375	0.01875	0.01875	0.0375	0.01875	0.025	0.05	0.025
4.05	0.0594	0.04569	0.03514	0.06954	0.05423	0.04229	0.06427	0.04977	0.03855	0.05315	0.04088	0.03144	0.06222	0.04852	0.03784	0.05751	0.04454	0.03449	0.06565	0.05049	0.03884	0.07686	0.05993	0.04674	0.07104	0.05501	0.04261
4.15	0.05009	0.03853	0.02963	0.0581	0.04531	0.03534	0.05395	0.04178	0.03236	0.04482	0.03447	0.02651	0.05199	0.04054	0.03162	0.04827	0.03739	0.02895	0.05537	0.04258	0.03275	0.06422	0.05008	0.03905	0.05963	0.04618	0.03577
4.25	0.04225	0.03249	0.02499	0.04855	0.03786	0.02953	0.04529	0.03508	0.02717	0.0378	0.02907	0.02236	0.04344	0.03388	0.02642	0.04052	0.03138	0.02431	0.04669	0.03591	0.02762	0.05366	0.04185	0.03263	0.05006	0.03877	0.03002
4.35	0.03563	0.0274	0.02108	0.04057	0.03164	0.02467	0.03802	0.02944	0.0228	0.03188	0.02452	0.01886	0.0363	0.02831	0.02208	0.03402	0.02635	0.0204	0.03938	0.03029	0.02329	0.04484	0.03497	0.02727	0.04202	0.03254	0.0252
4.45	0.03005	0.02311	0.01777	0.0339	0.02644	0.02062	0.03192	0.02472	0.01914	0.02688	0.02068	0.0159	0.03033	0.02365	0.01845	0.02856	0.02212	0.01713	0.03321	0.02554	0.01964	0.03747	0.02922	0.02279	0.03528	0.02732	0.02116
4.55	0.02534	0.01949	0.01499	0.02833	0.02209	0.01723	0.02679	0.02075	0.01607	0.02267	0.01744	0.01341	0.02535	0.01977	0.01541	0.02397	0.01857	0.01438	0.02801	0.02154	0.01657	0.03131	0.02442	0.01904	0.02961	0.02293	0.01776
4.65	0.02137	0.01644	0.01264	0.02367	0.01846	0.01439	0.02249	0.01742	0.01349	0.01912	0.01471	0.01131	0.02118	0.01652	0.01288	0.02012	0.01558	0.01207	0.02362	0.01817	0.01397	0.02616	0.0204	0.01591	0.02486	0.01925	0.01491
4.75	0.01802	0.01386	0.01066	0.01978	0.01542	0.01203	0.01888	0.01462	0.01132	0.01612	0.0124	0.009538	0.0177	0.0138	0.01076	0.01689	0.01308	0.01013	0.01992	0.01532	0.01178	0.02186	0.01705	0.01329	0.02087	0.01616	0.01252
4.85	0.0152	0.01169	0.00899	0.01653	0.01289	0.01005	0.01585	0.01227	0.009506	0.0136	0.01046	0.008044	0.01479	0.01153	0.008993	0.01418	0.01098	0.008506	0.0168	0.01292	0.009937	0.01827	0.01425	0.01111	0.01752	0.01357	0.01051
4.95	0.01282	0.009858	0.007582	0.01381	0.01077	0.008399	0.0133	0.0103	0.00798	0.01147	0.00882	0.006784	0.01236	0.009636	0.007515	0.0119	0.009219	0.00714	0.01417	0.0109	0.00838	0.01526	0.0119	0.009283	0.01471	0.01139	0.00882
5.05	0.01081	0.008313	0.006394	0.01154	0.008999	0.007018	0.01117	0.00865	0.006699	0.009671	0.007438	0.005721	0.01033	0.008052	0.006279	0.009993	0.007739	0.005994	0.01195	0.009189	0.007067	0.01275	0.009947	0.007757	0.01234	0.00956	0.007404
5.15	0.009115	0.007011	0.005392	0.009643	0.00752	0.005864	0.009376	0.007261	0.005624	0.008156	0.006273	0.004825	0.008628	0.006728	0.005247	0.008389	0.006497	0.005032	0.01008	0.007749	0.00596	0.01066	0.008311	0.006481	0.01036	0.008026	0.006215
5.25	0.007687	0.005913	0.004548	0.008058	0.006284	0.0049	0.007871	0.006096	0.004721	0.006878	0.00529	0.004069	0.007209	0.005622	0.004384	0.007042	0.005454	0.004224	0.008497	0.006535	0.005026	0.008906	0.006945	0.005416	0.008699	0.006737	0.005218
5.35	0.006483	0.004986	0.003835	0.006733	0.005251	0.004095	0.006607	0.005117	0.003963	0.005801	0.004461	0.003431	0.006024	0.004698	0.003664	0.005912	0.004578	0.003546	0.007165	0.005511	0.004239	0.007442	0.005803	0.004526	0.007303	0.005656	0.00438
5.45	0.005467	0.004205	0.003234	0.005626	0.004387	0.003421	0.005546	0.004295	0.003327	0.004892	0.003762	0.002894	0.005034	0.003926	0.003061	0.004963	0.003843	0.002976	0.006043	0.004648	0.003575	0.006218	0.004849	0.003782	0.00613	0.004748	0.003677
5.55	0.004611	0.003546	0.002728	0.004701	0.003666	0.002859	0.004656	0.003606	0.002793	0.004125	0.003173	0.00244	0.004206	0.00328	0.002558	0.004166	0.003226	0.002499	0.005096	0.00392	0.003015	0.005196	0.004052	0.00316	0.005146	0.003985	0.003087
5.65	0.003888	0.002991	0.0023	0.003928	0.003063	0.002389	0.003909	0.003027	0.002344	0.003479	0.002676	0.002058	0.003515	0.002741	0.002137	0.003497	0.002708	0.002098	0.004298	0.003306	0.002542	0.004342	0.003386	0.00264	0.00432	0.003346	0.002591
5.75	0.003279	0.002522	0.00194	0.003283	0.00256	0.001996	0.003281	0.002541	0.001968	0.002934	0.002257	0.001736	0.002937	0.00229	0.001786	0.002936	0.002274	0.001761	0.003624	0.002788	0.002144	0.003628	0.002829	0.002206	0.003626	0.002809	0.002175
5.85	0.002766	0.002127	0.001636	0.002743	0.002139	0.001668	0.002754	0.002133	0.001652	0.002474	0.001903	0.001464	0.002454	0.001914	0.001492	0.002464	0.001909	0.001478	0.003057	0.002351	0.001808	0.003032	0.002364	0.001844	0.003044	0.002358	0.001826
5.95	0.002332	0.001794	0.00138	0.002292	0.001787	0.001394	0.002312	0.001791	0.001387	0.002087	0.001605	0.001234	0.002051	0.001599	0.001247	0.002069	0.001602	0.001241	0.002578	0.001983	0.001525	0.002533	0.001975	0.001541	0.002556	0.001979	0.001533
6.05	0.001967	0.001513	0.001164	0.001915	0.001494	0.001165	0.001941	0.001503	0.001164	0.00176	0.001354	0.001041	0.001714	0.001336	0.001042	0.001737	0.001345	0.001042	0.002174	0.001672	0.001286	0.002117	0.001651	0.001287	0.002145	0.001661	0.001287
6.15	0.001659	0.001276	0.0009813	0.0016	0.001248	0.0009732	0.001629	0.001262	0.0009773	0.001484	0.001141	0.000878	0.001432	0.001117	0.0008708	0.001458	0.001129	0.0008744	0.001833	0.00141	0.001085	0.001769	0.001379	0.001076	0.001801	0.001395	0.00108
6.25	0.001399	0.001076	0.0008275	0.001337	0.001043	0.0008132	0.001368	0.001059	0.0008204	0.001252	0.0009627	0.0007404	0.001196	0.000933	0.0007276	0.001224	0.0009478	0.000734	0.001546	0.001189	0.0009146	0.001478	0.001153	0.0008988	0.001512	0.001171	0.0009067
6.35	0.00118	0.0009074	0.0006979	0.001117	0.0008714	0.0006795	0.001148	0.0008892	0.0006887	0.001056	0.0008118	0.0006244	0.0009998	0.0007797	0.000608	0.001027	0.0007956	0.0006162	0.001304	0.001003	0.0007713	0.001235	0.0009631	0.0007511	0.001269	0.0009828	0.0007612
6.45	0.0009949	0.0007652	0.0005885	0.0009337	0.0007281	0.0005678	0.0009639	0.0007465	0.0005781	0.0008902	0.0006847	0.0005266	0.0008354	0.0006515	0.000508	0.0008624	0.0006679	0.0005173	0.0011	0.0008458	0.0006505	0.001032	0.0008048	0.0006276	0.001065	0.000825	0.000639
6.55	0.000839	0.0006453	0.0004963	0.0007802	0.0006084	0.0004745	0.0008091	0.0006266	0.0004853	0.0007507	0.0005774	0.0004441	0.0006981	0.0005444	0.0004245	0.0007239	0.0005607	0.0004342	0.0009274	0.0007133	0.0005486	0.0008623	0.0006725	0.0005244	0.0008943	0.0006926	0.0005364
6.65	0.0007076	0.0005442	0.0004186	0.0006519	0.0005084	0.0003965	0.0006792	0.000526	0.0004074	0.0006331	0.0004869	0.0003745	0.0005833	0.0004549	0.0003547	0.0006077	0.0004707	0.0003645	0.0007821	0.0006015	0.0004626	0.0007206	0.0005619	0.0004382	0.0007507	0.0005814	0.0004503
6.75	0.002562	0.000459	0.000353	0.002552	0.0004248	0.0003313	0.002557	0.0004416	0.000342	0.002292	0.0004107	0.0003158	0.002284	0.0003801	0.0002964	0.002288	0.0003951	0.000306	0.002832	0.0005073	0.0003902	0.002821	0.0004695	0.0003662	0.002826	0.0004881	0.000378
6.85	0.003389	0.0007186	0.0002977	0.003398	0.0006938	0.0002768	0.003394	0.0007059	0.0002871	0.003032	0.0006429	0.0002664	0.00304	0.0006208	0.0002477	0.003036	0.0006316	0.0002569	0.003746	0.0007942	0.000329	0.003756	0.0007668	0.000306	0.003751	0.0007802	0.0003173
6.95	0.003389	0.002019	0.0002511	0.003398	0.002024	0.0002313	0.003394	0.002021	0.000241	0.003032	0.001806	0.0002246	0.00304	0.001811	0.000207	0.003036	0.001809	0.0002156	0.003746	0.002231	0.0002775	0.003756	0.002237	0.0002557	0.003751	0.002234	0.0002664
7.05	0.003389	0.002019	0.000909	0.003398	0.002024	0.0009056	0.003394	0.002021	0.0009073	0.003032	0.001806	0.0008133	0.00304	0.001811	0.0008103	0.003036	0.001809	0.0008118	0.003746	0.002231	0.001005	0.003756	0.002237	0.001001	0.003751	0.002234	0.001003
7.15	0.003389	0.002019	0.001202	0.003398	0.002024	0.001206	0.003394	0.002021	0.001204	0.003032	0.001806	0.001076	0.00304	0.001811	0.001079	0.003036	0.001809	0.001077	0.003746	0.002231	0.001329	0.003756	0.002237	0.001333	0.003751	0.002234	0.001331
7.25	0.001017	0.002019	0.001202	0.001019	0.002024	0.001206	0.001018	0.002021	0.001204	0.0009096	0.001806	0.001076	0.0009121	0.001811	0.001079	0.0009109	0.001809	0.001077	0.001124	0.002231	0.001329	0.001127	0.002237	0.001333	0.001125	0.002234	0.001331
7.35	0	0.001615	0.001202	0	0.001619	0.001206	0	0.001617	0.001204	0	0.001445	0.001076	0	0.001449	0.001079	0	0.001447	0.001077	0	0.001785	0.001329	0	0.00179	0.001333	0	0.001787	0.001331
7.45	0	0	0.001202	0	0	0.001206	0	0	0.001204	0	0	0.001076	0	0	0.001079	0	0	0.001077	0	0	0.001329	0	0	0.001333	0	0	0.001331
7.55	0	0	0.0003607	0	0	0.0003617	0	0	0.0003612	0	0	0.0003228	0	0	0.0003236	0	0	0.0003232	0	0	0.0003987	0	0	0.0003998	0	0	0.0003992
West (S5)	Weights /Earthquake Rates
Magnitude	0.0375	0.075	0.0375	0.0375	0.075	0.0375	0.05	0.1	0.05	0.01875	0.0375	0.01875	0.01875	0.0375	0.01875	0.025	0.05	0.025	0.01875	0.0375	0.01875	0.01875	0.0375	0.01875	0.025	0.05	0.025
4.05	0.05462	0.04201	0.03231	0.0626	0.04882	0.03807	0.05848	0.04529	0.03507	0.04887	0.03759	0.02891	0.05601	0.04368	0.03406	0.05232	0.04052	0.03138	0.06037	0.04643	0.03571	0.06919	0.05396	0.04208	0.06463	0.05006	0.03877
4.15	0.04606	0.03543	0.02725	0.05231	0.04079	0.03181	0.04909	0.03802	0.02944	0.04122	0.0317	0.02438	0.0468	0.0365	0.02846	0.04392	0.03402	0.02634	0.05091	0.03916	0.03012	0.05782	0.04509	0.03516	0.05426	0.04202	0.03254
4.25	0.03885	0.02988	0.02298	0.04371	0.03409	0.02658	0.04121	0.03191	0.02472	0.03476	0.02673	0.02056	0.03911	0.0305	0.02378	0.03687	0.02856	0.02212	0.04294	0.03302	0.0254	0.04831	0.03768	0.02938	0.04555	0.03527	0.02732
4.35	0.03276	0.0252	0.01938	0.03653	0.02848	0.02221	0.03459	0.02679	0.02075	0.02931	0.02255	0.01734	0.03268	0.02549	0.01987	0.03095	0.02397	0.01856	0.03621	0.02785	0.02142	0.04037	0.03148	0.02455	0.03823	0.02961	0.02293
4.45	0.02763	0.02125	0.01634	0.03052	0.0238	0.01856	0.02904	0.02249	0.01742	0.02472	0.01901	0.01462	0.02731	0.0213	0.01661	0.02598	0.02012	0.01558	0.03054	0.02349	0.01806	0.03373	0.02631	0.02051	0.0321	0.02486	0.01925
4.55	0.0233	0.01792	0.01378	0.0255	0.01989	0.01551	0.02438	0.01888	0.01462	0.02085	0.01603	0.01233	0.02282	0.01779	0.01388	0.02181	0.01689	0.01308	0.02575	0.01981	0.01523	0.02819	0.02198	0.01714	0.02694	0.02087	0.01616
4.65	0.01965	0.01511	0.01162	0.02131	0.01662	0.01296	0.02046	0.01585	0.01227	0.01758	0.01352	0.0104	0.01907	0.01487	0.0116	0.01831	0.01418	0.01098	0.02172	0.0167	0.01285	0.02355	0.01837	0.01432	0.02262	0.01752	0.01357
4.75	0.01657	0.01275	0.009803	0.01781	0.01389	0.01083	0.01718	0.0133	0.0103	0.01483	0.0114	0.008771	0.01593	0.01242	0.009689	0.01537	0.0119	0.009219	0.01832	0.01409	0.01083	0.01968	0.01535	0.01197	0.01899	0.0147	0.01139
4.85	0.01398	0.01075	0.008267	0.01488	0.0116	0.009049	0.01442	0.01117	0.00865	0.0125	0.009617	0.007397	0.01331	0.01038	0.008096	0.0129	0.009993	0.007739	0.01545	0.01188	0.009138	0.01645	0.01282	0.01	0.01594	0.01234	0.00956
4.95	0.01179	0.009065	0.006972	0.01243	0.009696	0.007561	0.01211	0.009375	0.007261	0.01055	0.008111	0.006238	0.01112	0.008675	0.006765	0.01083	0.008389	0.006497	0.01303	0.01002	0.007706	0.01374	0.01072	0.008357	0.01338	0.01036	0.008025
5.05	0.009939	0.007645	0.00588	0.01039	0.008102	0.006318	0.01016	0.00787	0.006095	0.008893	0.00684	0.005261	0.009296	0.007249	0.005653	0.009093	0.007042	0.005454	0.01099	0.008449	0.006499	0.01148	0.008955	0.006983	0.01123	0.008699	0.006737
5.15	0.008382	0.006447	0.004959	0.008681	0.00677	0.005279	0.008531	0.006607	0.005117	0.0075	0.005768	0.004437	0.007768	0.006057	0.004724	0.007633	0.005911	0.004578	0.009265	0.007126	0.005481	0.009595	0.007483	0.005835	0.009429	0.007302	0.005655
5.25	0.007069	0.005437	0.004182	0.007254	0.005657	0.004412	0.007161	0.005546	0.004295	0.006325	0.004865	0.003742	0.006491	0.005062	0.003947	0.006407	0.004962	0.003843	0.007813	0.006009	0.004622	0.008018	0.006253	0.004876	0.007915	0.00613	0.004747
5.35	0.005962	0.004585	0.003527	0.006062	0.004727	0.003686	0.006012	0.004656	0.003606	0.005334	0.004103	0.003155	0.005424	0.004229	0.003298	0.005379	0.004166	0.003226	0.006589	0.005068	0.003898	0.0067	0.005225	0.004074	0.006644	0.005146	0.003985
5.45	0.005028	0.003867	0.002974	0.005065	0.00395	0.00308	0.005047	0.003908	0.003027	0.004498	0.00346	0.002661	0.004532	0.003534	0.002756	0.004515	0.003497	0.002708	0.005557	0.004274	0.003287	0.005598	0.004366	0.003405	0.005578	0.00432	0.003345
5.55	0.00424	0.003261	0.002508	0.004232	0.003301	0.002574	0.004236	0.003281	0.002541	0.003794	0.002918	0.002244	0.003787	0.002953	0.002303	0.00379	0.002936	0.002273	0.004686	0.003604	0.002772	0.004678	0.003648	0.002845	0.004682	0.003626	0.002808
5.65	0.003576	0.00275	0.002115	0.003537	0.002758	0.002151	0.003556	0.002754	0.002133	0.003199	0.002461	0.001893	0.003164	0.002468	0.001924	0.003182	0.002464	0.001908	0.003952	0.00304	0.002338	0.003909	0.003048	0.002377	0.003931	0.003044	0.002358
5.75	0.003016	0.002319	0.001784	0.002955	0.002305	0.001797	0.002985	0.002312	0.001791	0.002698	0.002075	0.001596	0.002644	0.002062	0.001608	0.002671	0.002069	0.001602	0.003333	0.002563	0.001972	0.003266	0.002547	0.001986	0.0033	0.002555	0.001979
5.85	0.002543	0.001956	0.001504	0.002469	0.001926	0.001502	0.002506	0.001941	0.001503	0.002275	0.00175	0.001346	0.002209	0.001723	0.001344	0.002242	0.001737	0.001345	0.002811	0.002162	0.001663	0.002729	0.002128	0.00166	0.00277	0.002145	0.001661
5.95	0.002145	0.00165	0.001269	0.002063	0.001609	0.001255	0.002104	0.001629	0.001262	0.001919	0.001476	0.001135	0.001846	0.00144	0.001123	0.001882	0.001458	0.001129	0.00237	0.001823	0.001402	0.002281	0.001779	0.001387	0.002325	0.001801	0.001395
6.05	0.001809	0.001391	0.00107	0.001724	0.001345	0.001049	0.001766	0.001368	0.001059	0.001618	0.001245	0.0009573	0.001543	0.001203	0.0009382	0.00158	0.001224	0.0009477	0.001999	0.001538	0.001183	0.001906	0.001486	0.001159	0.001952	0.001512	0.001171
6.15	0.001525	0.001173	0.0009023	0.001441	0.001124	0.0008762	0.001482	0.001148	0.0008892	0.001365	0.00105	0.0008073	0.001289	0.001005	0.0007839	0.001326	0.001027	0.0007956	0.001686	0.001297	0.0009973	0.001592	0.001242	0.0009684	0.001639	0.001269	0.0009828
6.25	0.001286	0.0009894	0.000761	0.001204	0.0009388	0.0007321	0.001244	0.0009638	0.0007464	0.001151	0.0008852	0.0006809	0.001077	0.00084	0.0006551	0.001113	0.0008624	0.0006679	0.001422	0.001094	0.0008411	0.001331	0.001038	0.0008092	0.001375	0.001065	0.000825
6.35	0.001085	0.0008344	0.0006417	0.001006	0.0007845	0.0006118	0.001045	0.0008091	0.0006266	0.0009706	0.0007465	0.0005742	0.0009001	0.0007019	0.0005474	0.0009347	0.0007239	0.0005606	0.001199	0.0009222	0.0007093	0.001112	0.0008671	0.0006762	0.001155	0.0008942	0.0006926
6.45	0.0009149	0.0007037	0.0005412	0.0008406	0.0006555	0.0005112	0.000877	0.0006792	0.000526	0.0008186	0.0006296	0.0004842	0.0007521	0.0005865	0.0004574	0.0007847	0.0006077	0.0004706	0.001011	0.0007777	0.0005982	0.0009291	0.0007245	0.000565	0.0009693	0.0007507	0.0005814
6.55	0.004611	0.0005934	0.0004564	0.004624	0.0005478	0.0004272	0.004618	0.0005702	0.0004416	0.004126	0.000531	0.0004084	0.004137	0.0004901	0.0003822	0.004132	0.0005101	0.0003951	0.005097	0.0006559	0.0005045	0.005111	0.0006054	0.0004721	0.005104	0.0006302	0.000488
6.65	0.004611	0.001634	0.0003849	0.004624	0.001616	0.0003569	0.004618	0.001625	0.0003707	0.004126	0.001462	0.0003444	0.004137	0.001446	0.0003194	0.004132	0.001454	0.0003317	0.005097	0.001806	0.0004254	0.005111	0.001786	0.0003945	0.005104	0.001796	0.0004097
6.75	0.004611	0.002747	0.0003246	0.004624	0.002754	0.0002983	0.004618	0.002751	0.0003112	0.004126	0.002458	0.0002904	0.004137	0.002464	0.0002669	0.004132	0.002461	0.0002784	0.005097	0.003036	0.0003588	0.005111	0.003044	0.0003297	0.005104	0.00304	0.0003439
6.85	0.004611	0.002747	0.001636	0.004624	0.002754	0.001641	0.004618	0.002751	0.001638	0.004126	0.002458	0.001464	0.004137	0.002464	0.001468	0.004132	0.002461	0.001466	0.005097	0.003036	0.001808	0.005111	0.003044	0.001813	0.005104	0.00304	0.001811
6.95	0.004611	0.002747	0.001636	0.004624	0.002754	0.001641	0.004618	0.002751	0.001638	0.004126	0.002458	0.001464	0.004137	0.002464	0.001468	0.004132	0.002461	0.001466	0.005097	0.003036	0.001808	0.005111	0.003044	0.001813	0.005104	0.00304	0.001811
7.05	0	0.002747	0.001636	0	0.002754	0.001641	0	0.002751	0.001638	0	0.002458	0.001464	0	0.002464	0.001468	0	0.002461	0.001466	0	0.003036	0.001808	0	0.003044	0.001813	0	0.00304	0.001811
7.15	0	0.001373	0.001636	0	0.001377	0.001641	0	0.001375	0.001638	0	0.001229	0.001464	0	0.001232	0.001468	0	0.001231	0.001466	0	0.001518	0.001808	0	0.001522	0.001813	0	0.00152	0.001811
7.25	0	0	0.001636	0	0	0.001641	0	0	0.001638	0	0	0.001464	0	0	0.001468	0	0	0.001466	0	0	0.001808	0	0	0.001813	0	0	0.001811
Center+West (S4+S5)		Weights /Earthquake Rates
Magnitude	0.0375	0.075	0.0375	0.0375	0.075	0.0375	0.05	0.1	0.05	0.01875	0.0375	0.01875	0.01875	0.0375	0.01875	0.025	0.05	0.025	0.01875	0.0375	0.01875	0.01875	0.0375	0.01875	0.025	0.05	0.025
4.05	0.06303	0.04847	0.03728	0.07543	0.05882	0.04587	0.06895	0.0534	0.04136	0.05639	0.04337	0.03336	0.06749	0.05263	0.04104	0.06169	0.04778	0.037	0.06966	0.05358	0.04121	0.08337	0.06501	0.0507	0.07621	0.05902	0.04571
4.15	0.05315	0.04088	0.03144	0.06303	0.04915	0.03833	0.05788	0.04483	0.03472	0.04756	0.03658	0.02813	0.0564	0.04398	0.0343	0.05179	0.04011	0.03106	0.05875	0.04518	0.03475	0.06966	0.05433	0.04237	0.06398	0.04955	0.03837
4.25	0.04482	0.03448	0.02652	0.05267	0.04107	0.03203	0.04859	0.03763	0.02914	0.04011	0.03085	0.02373	0.04712	0.03675	0.02866	0.04348	0.03367	0.02608	0.04954	0.03811	0.02931	0.05821	0.0454	0.0354	0.0537	0.04159	0.03221
4.35	0.0378	0.02907	0.02236	0.04401	0.03432	0.02676	0.04079	0.03159	0.02447	0.03382	0.02601	0.02001	0.03938	0.03071	0.02395	0.0365	0.02826	0.02189	0.04178	0.03214	0.02472	0.04864	0.03793	0.02958	0.04508	0.03492	0.02704
4.45	0.03188	0.02452	0.01886	0.03677	0.02868	0.02236	0.03424	0.02652	0.02054	0.02852	0.02194	0.01687	0.0329	0.02566	0.02001	0.03064	0.02373	0.01838	0.03524	0.0271	0.02084	0.04065	0.0317	0.02472	0.03785	0.02931	0.0227
4.55	0.02689	0.02068	0.0159	0.03073	0.02396	0.01869	0.02874	0.02226	0.01724	0.02406	0.0185	0.01423	0.02749	0.02144	0.01672	0.02572	0.01992	0.01543	0.02972	0.02286	0.01758	0.03396	0.02649	0.02065	0.03177	0.0246	0.01906
4.65	0.02267	0.01744	0.01341	0.02568	0.02002	0.01562	0.02413	0.01869	0.01447	0.02029	0.0156	0.012	0.02297	0.01792	0.01397	0.02159	0.01672	0.01295	0.02506	0.01927	0.01482	0.02838	0.02213	0.01726	0.02667	0.02065	0.016
4.75	0.01912	0.01471	0.01131	0.02146	0.01673	0.01305	0.02026	0.01569	0.01215	0.01711	0.01316	0.01012	0.0192	0.01497	0.01167	0.01812	0.01404	0.01087	0.02113	0.01625	0.0125	0.02371	0.01849	0.01442	0.02239	0.01734	0.01343
4.85	0.01613	0.0124	0.009539	0.01793	0.01398	0.0109	0.017	0.01317	0.0102	0.01443	0.0111	0.008535	0.01604	0.01251	0.009755	0.01521	0.01178	0.009125	0.01782	0.01371	0.01054	0.01982	0.01545	0.01205	0.01879	0.01456	0.01127
4.95	0.0136	0.01046	0.008045	0.01498	0.01168	0.009111	0.01427	0.01105	0.008561	0.01217	0.009359	0.007198	0.0134	0.01045	0.008152	0.01277	0.009891	0.00766	0.01503	0.01156	0.008892	0.01656	0.01291	0.01007	0.01578	0.01222	0.009463
5.05	0.01147	0.008821	0.006784	0.01252	0.009762	0.007613	0.01198	0.00928	0.007187	0.01026	0.007892	0.00607	0.0112	0.008735	0.006811	0.01072	0.008303	0.00643	0.01268	0.00975	0.007499	0.01384	0.01079	0.008414	0.01324	0.01026	0.007944
5.15	0.009672	0.007439	0.005722	0.01046	0.008157	0.006361	0.01006	0.00779	0.006033	0.008654	0.006656	0.005119	0.009359	0.007299	0.005692	0.009	0.00697	0.005398	0.01069	0.008222	0.006324	0.01156	0.009016	0.007031	0.01112	0.00861	0.006668
5.25	0.008157	0.006274	0.004825	0.008741	0.006816	0.005316	0.008444	0.00654	0.005065	0.007298	0.005613	0.004317	0.007821	0.006099	0.004756	0.007555	0.005851	0.004532	0.009015	0.006934	0.005333	0.009661	0.007534	0.005875	0.009333	0.007228	0.005598
5.35	0.006879	0.005291	0.004069	0.007304	0.005696	0.004442	0.007088	0.00549	0.004252	0.006155	0.004734	0.003641	0.006535	0.005096	0.003974	0.006342	0.004912	0.003804	0.007603	0.005848	0.004498	0.008073	0.006295	0.004909	0.007835	0.006068	0.004699
5.45	0.005801	0.004462	0.003432	0.006103	0.004759	0.003711	0.00595	0.004608	0.003569	0.005191	0.003992	0.003071	0.005461	0.004258	0.003321	0.005324	0.004123	0.003193	0.006412	0.004932	0.003793	0.006745	0.00526	0.004102	0.006577	0.005093	0.003945
5.55	0.004892	0.003763	0.002894	0.0051	0.003977	0.003101	0.004995	0.003869	0.002996	0.004377	0.003367	0.002589	0.004563	0.003558	0.002775	0.004469	0.003461	0.002681	0.005407	0.004159	0.003199	0.005637	0.004396	0.003428	0.005521	0.004276	0.003311
5.65	0.004126	0.003173	0.002441	0.004261	0.003323	0.002591	0.004193	0.003247	0.002515	0.003692	0.002839	0.002184	0.003813	0.002973	0.002319	0.003752	0.002906	0.00225	0.00456	0.003507	0.002698	0.00471	0.003673	0.002864	0.004635	0.003589	0.00278
5.75	0.00348	0.002676	0.002058	0.003561	0.002777	0.002165	0.00352	0.002726	0.002111	0.003113	0.002394	0.001842	0.003186	0.002485	0.001937	0.00315	0.002439	0.001889	0.003846	0.002958	0.002275	0.003936	0.003069	0.002393	0.003891	0.003013	0.002334
5.85	0.002934	0.002257	0.001736	0.002975	0.00232	0.001809	0.002955	0.002288	0.001772	0.002626	0.002019	0.001553	0.002662	0.002076	0.001619	0.002644	0.002048	0.001586	0.003243	0.002494	0.001919	0.003289	0.002565	0.002	0.003266	0.002529	0.001959
5.95	0.002475	0.001903	0.001464	0.002486	0.001939	0.001512	0.002481	0.001921	0.001488	0.002214	0.001703	0.00131	0.002225	0.001735	0.001353	0.002219	0.001719	0.001331	0.002735	0.002104	0.001618	0.002748	0.002143	0.001671	0.002742	0.002123	0.001644
6.05	0.002087	0.001605	0.001235	0.002078	0.00162	0.001263	0.002082	0.001613	0.001249	0.001867	0.001436	0.001105	0.001859	0.00145	0.00113	0.001863	0.001443	0.001117	0.002307	0.001774	0.001365	0.002296	0.001791	0.001396	0.002302	0.001782	0.00138
6.15	0.00176	0.001354	0.001041	0.001736	0.001354	0.001056	0.001748	0.001354	0.001048	0.001575	0.001211	0.0009316	0.001553	0.001211	0.0009446	0.001564	0.001211	0.0009381	0.001945	0.001496	0.001151	0.001919	0.001496	0.001167	0.001932	0.001496	0.001159
6.25	0.001484	0.001142	0.000878	0.001451	0.001131	0.0008822	0.001467	0.001136	0.0008801	0.001328	0.001021	0.0007856	0.001298	0.001012	0.0007893	0.001313	0.001017	0.0007875	0.001641	0.001262	0.0009705	0.001603	0.00125	0.000975	0.001622	0.001256	0.0009728
6.35	0.001252	0.0009628	0.0007405	0.001212	0.0009452	0.0007371	0.001232	0.000954	0.0007388	0.00112	0.0008614	0.0006625	0.001085	0.0008457	0.0006595	0.001102	0.0008536	0.0006611	0.001384	0.001064	0.0008184	0.00134	0.001045	0.0008147	0.001361	0.001054	0.0008166
6.45	0.001056	0.0008119	0.0006245	0.001013	0.0007899	0.000616	0.001034	0.0008008	0.0006202	0.0009445	0.0007265	0.0005587	0.0009062	0.0007067	0.0005511	0.0009252	0.0007165	0.0005549	0.001167	0.0008974	0.0006902	0.001119	0.000873	0.0006808	0.001143	0.0008851	0.0006855
6.55	0.0008903	0.0006847	0.0005266	0.0008463	0.00066	0.0005147	0.0008681	0.0006723	0.0005207	0.0007965	0.0006127	0.0004712	0.0007573	0.0005905	0.0004605	0.0007767	0.0006015	0.0004658	0.000984	0.0007568	0.0005821	0.0009354	0.0007295	0.0005689	0.0009594	0.000743	0.0005755
6.65	0.0007508	0.0005775	0.0004441	0.0007072	0.0005515	0.0004301	0.0007287	0.0005643	0.0004371	0.0006718	0.0005167	0.0003974	0.0006328	0.0004934	0.0003848	0.000652	0.0005049	0.0003911	0.0008298	0.0006382	0.0004909	0.0007816	0.0006096	0.0004753	0.0008054	0.0006238	0.0004831
6.75	0.0006332	0.000487	0.0003746	0.0005909	0.0004608	0.0003594	0.0006117	0.0004737	0.0003669	0.0005665	0.0004357	0.0003351	0.0005287	0.0004123	0.0003215	0.0005473	0.0004239	0.0003283	0.0006998	0.0005382	0.000414	0.0006531	0.0005093	0.0003972	0.0006761	0.0005236	0.0004055
6.85	0.000534	0.0004107	0.0003159	0.0004938	0.0003851	0.0003003	0.0005135	0.0003977	0.000308	0.0004778	0.0003675	0.0002826	0.0004418	0.0003445	0.0002687	0.0004595	0.0003558	0.0002756	0.0005902	0.0004539	0.0003491	0.0005458	0.0004256	0.0003319	0.0005676	0.0004396	0.0003404
6.95	0.00104	0.0003464	0.0002664	0.001015	0.0003218	0.0002509	0.001027	0.0003338	0.0002586	0.0009304	0.0003099	0.0002383	0.0009083	0.0002879	0.0002245	0.0009191	0.0002987	0.0002313	0.001149	0.0003828	0.0002944	0.001122	0.0003556	0.0002773	0.001135	0.000369	0.0002858
7.05	0.002389	0.0002921	0.0002247	0.002395	0.0002689	0.0002097	0.002392	0.0002803	0.000217	0.002137	0.0002613	0.000201	0.002143	0.0002406	0.0001876	0.00214	0.0002508	0.0001942	0.00264	0.0003228	0.0002483	0.002647	0.0002972	0.0002317	0.002644	0.0003098	0.0002399
7.15	0.002389	0.001191	0.0001895	0.002395	0.00119	0.0001752	0.002392	0.00119	0.0001822	0.002137	0.001066	0.0001695	0.002143	0.001064	0.0001568	0.00214	0.001065	0.000163	0.00264	0.001316	0.0002094	0.002647	0.001315	0.0001936	0.002644	0.001316	0.0002014
7.25	0.002389	0.001423	0.000369	0.002395	0.001427	0.0003602	0.002392	0.001425	0.0003645	0.002137	0.001273	0.0003301	0.002143	0.001277	0.0003223	0.00214	0.001275	0.0003261	0.00264	0.001573	0.0004078	0.002647	0.001577	0.0003981	0.002644	0.001575	0.0004028
7.35	0.002389	0.001423	0.0008476	0.002395	0.001427	0.0008499	0.002392	0.001425	0.0008488	0.002137	0.001273	0.0007584	0.002143	0.001277	0.0007604	0.00214	0.001275	0.0007594	0.00264	0.001573	0.0009368	0.002647	0.001577	0.0009393	0.002644	0.001575	0.0009381
7.45	0.001672	0.001423	0.0008476	0.001677	0.001427	0.0008499	0.001675	0.001425	0.0008488	0.001496	0.001273	0.0007584	0.0015	0.001277	0.0007604	0.001498	0.001275	0.0007594	0.001848	0.001573	0.0009368	0.001853	0.001577	0.0009393	0.001851	0.001575	0.0009381
7.55	0	0.001423	0.0008476	0	0.001427	0.0008499	0	0.001425	0.0008488	0	0.001273	0.0007584	0	0.001277	0.0007604	0	0.001275	0.0007594	0	0.001573	0.0009368	0	0.001577	0.0009393	0	0.001575	0.0009381
7.65	0	0.0002846	0.0008476	0	0.0002854	0.0008499	0	0.000285	0.0008488	0	0.0002546	0.0007584	0	0.0002553	0.0007604	0	0.000255	0.0007594	0	0.0003145	0.0009368	0	0.0003154	0.0009393	0	0.000315	0.0009381
7.75	0	0	0.0005933	0	0	0.0005949	0	0	0.0005941	0	0	0.0005309	0	0	0.0005323	0	0	0.0005316	0	0	0.0006558	0	0	0.0006575	0	0	0.0006567
South_Cinarcik	Weights /Earthquake Rates
Magnitude	0.0375	0.075	0.0375	0.0375	0.075	0.0375	0.05	0.1	0.05	0.01875	0.0375	0.01875	0.01875	0.0375	0.01875	0.025	0.05	0.025	0.01875	0.0375	0.01875	0.01875	0.0375	0.01875	0.025	0.05	0.025
4.05	0.01955	0.01493	0.01141	0.0171	0.01288	0.009703	0.02235	0.01731	0.0134	0.02607	0.01991	0.01521	0.0228	0.01717	0.01294	0.0298	0.02308	0.01787	0.03258	0.02489	0.01901	0.0285	0.02147	0.01617	0.03725	0.02885	0.02234
4.15	0.01656	0.01265	0.009664	0.01462	0.01101	0.008297	0.01876	0.01453	0.01125	0.02208	0.01687	0.01289	0.01949	0.01468	0.01106	0.02501	0.01937	0.015	0.02761	0.02109	0.01611	0.02437	0.01836	0.01383	0.03127	0.02422	0.01875
4.25	0.01403	0.01072	0.008187	0.0125	0.009417	0.007095	0.01575	0.0122	0.009446	0.01871	0.01429	0.01092	0.01667	0.01256	0.009459	0.021	0.01626	0.01259	0.02339	0.01786	0.01365	0.02083	0.0157	0.01182	0.02625	0.02033	0.01574
4.35	0.01189	0.009081	0.006937	0.01069	0.008052	0.006066	0.01322	0.01024	0.007929	0.01585	0.01211	0.009249	0.01425	0.01074	0.008088	0.01763	0.01365	0.01057	0.01982	0.01514	0.01156	0.01781	0.01342	0.01011	0.02203	0.01706	0.01322
4.45	0.01007	0.007694	0.005877	0.00914	0.006885	0.005187	0.0111	0.008595	0.006656	0.01343	0.01026	0.007836	0.01219	0.009181	0.006916	0.0148	0.01146	0.008875	0.01679	0.01282	0.009795	0.01523	0.01148	0.008645	0.0185	0.01432	0.01109
4.55	0.008534	0.006519	0.004979	0.007815	0.005887	0.004435	0.009316	0.007215	0.005588	0.01138	0.008691	0.006639	0.01042	0.00785	0.005914	0.01242	0.00962	0.00745	0.01422	0.01086	0.008298	0.01302	0.009812	0.007392	0.01553	0.01203	0.009313
4.65	0.00723	0.005523	0.004218	0.006682	0.005034	0.003793	0.007821	0.006057	0.004691	0.00964	0.007364	0.005625	0.00891	0.006712	0.005057	0.01043	0.008076	0.006254	0.01205	0.009204	0.007031	0.01114	0.00839	0.006321	0.01303	0.01009	0.007818
4.75	0.006126	0.004679	0.003574	0.005714	0.004305	0.003243	0.006565	0.005084	0.003938	0.008168	0.006239	0.004765	0.007618	0.005739	0.004324	0.008754	0.006779	0.00525	0.01021	0.007798	0.005957	0.009523	0.007174	0.005405	0.01094	0.008474	0.006563
4.85	0.00519	0.003964	0.003028	0.004886	0.003681	0.002773	0.005511	0.004268	0.003306	0.00692	0.005286	0.004037	0.006514	0.004908	0.003697	0.007348	0.005691	0.004407	0.00865	0.006607	0.005047	0.008143	0.006134	0.004621	0.009185	0.007114	0.005509
4.95	0.004397	0.003359	0.002565	0.004178	0.003147	0.002371	0.004626	0.003583	0.002775	0.005863	0.004478	0.00342	0.00557	0.004196	0.003161	0.006169	0.004777	0.0037	0.007328	0.005598	0.004276	0.006963	0.005245	0.003952	0.007711	0.005972	0.004625
5.05	0.003725	0.002845	0.002173	0.003572	0.002691	0.002027	0.003884	0.003008	0.002329	0.004967	0.003794	0.002898	0.004763	0.003588	0.002703	0.005178	0.00401	0.003106	0.006209	0.004742	0.003622	0.005954	0.004485	0.003379	0.006473	0.005013	0.003882
5.15	0.003156	0.002411	0.001841	0.003054	0.002301	0.001734	0.00326	0.002525	0.001955	0.004208	0.003214	0.002455	0.004073	0.003068	0.002311	0.004347	0.003367	0.002607	0.00526	0.004018	0.003069	0.005091	0.003835	0.002889	0.005434	0.004208	0.003259
5.25	0.002674	0.002042	0.00156	0.002612	0.001968	0.001482	0.002737	0.00212	0.001642	0.003565	0.002723	0.00208	0.003482	0.002623	0.001976	0.003649	0.002826	0.002189	0.004457	0.003404	0.0026	0.004353	0.003279	0.00247	0.004561	0.003533	0.002736
5.35	0.002265	0.00173	0.001322	0.002233	0.001682	0.001267	0.002297	0.001779	0.001378	0.003021	0.002307	0.001762	0.002978	0.002243	0.00169	0.003063	0.002372	0.001837	0.003776	0.002884	0.002203	0.003722	0.002804	0.002112	0.003829	0.002965	0.002297
5.45	0.001919	0.001466	0.00112	0.00191	0.001439	0.001084	0.001929	0.001494	0.001157	0.002559	0.001955	0.001493	0.002546	0.001918	0.001445	0.002571	0.001992	0.001542	0.003199	0.002443	0.001866	0.003183	0.002398	0.001806	0.003214	0.002489	0.001928
5.55	0.001626	0.001242	0.0009487	0.001633	0.00123	0.0009267	0.001619	0.001254	0.0009711	0.002168	0.001656	0.001265	0.002177	0.00164	0.001236	0.002159	0.001672	0.001295	0.00271	0.00207	0.001581	0.002721	0.00205	0.001544	0.002698	0.00209	0.001618
5.65	0.001378	0.001052	0.0008038	0.001396	0.001052	0.0007924	0.001359	0.001053	0.0008152	0.001837	0.001403	0.001072	0.001862	0.001402	0.001056	0.001812	0.001403	0.001087	0.002296	0.001754	0.00134	0.002327	0.001753	0.001321	0.002265	0.001754	0.001359
5.75	0.001167	0.0008916	0.000681	0.001194	0.0008993	0.0006775	0.001141	0.0008836	0.0006843	0.001556	0.001189	0.000908	0.001592	0.001199	0.0009034	0.001521	0.001178	0.0009124	0.001945	0.001486	0.001135	0.00199	0.001499	0.001129	0.001901	0.001473	0.00114
5.85	0.0009889	0.0007554	0.000577	0.001021	0.000769	0.0005793	0.0009577	0.0007417	0.0005744	0.001319	0.001007	0.0007693	0.001361	0.001025	0.0007724	0.001277	0.000989	0.0007659	0.001648	0.001259	0.0009616	0.001701	0.001282	0.0009656	0.001596	0.001236	0.0009574
5.95	0.0008378	0.00064	0.0004888	0.0008728	0.0006575	0.0004954	0.000804	0.0006226	0.0004822	0.001117	0.0008533	0.0006518	0.001164	0.0008767	0.0006605	0.001072	0.0008302	0.000643	0.001396	0.001067	0.0008147	0.001455	0.001096	0.0008256	0.00134	0.001038	0.0008037
6.05	0.0007098	0.0005422	0.0004141	0.0007463	0.0005622	0.0004236	0.0006749	0.0005227	0.0004048	0.0009464	0.0007229	0.0005522	0.0009951	0.0007497	0.0005648	0.0008999	0.0006969	0.0005397	0.001183	0.0009036	0.0006902	0.001244	0.0009371	0.000706	0.001125	0.0008711	0.0006747
6.15	0.0006014	0.0004594	0.0003509	0.0006382	0.0004808	0.0003622	0.0005666	0.0004388	0.0003398	0.0008018	0.0006125	0.0004678	0.0008509	0.000641	0.0004829	0.0007554	0.000585	0.0004531	0.001002	0.0007656	0.0005848	0.001064	0.0008013	0.0006036	0.0009443	0.0007313	0.0005664
6.25	0.0005095	0.0003892	0.0002973	0.0005457	0.0004111	0.0003097	0.0004756	0.0003683	0.0002853	0.0006793	0.0005189	0.0003964	0.0007276	0.0005481	0.0004129	0.0006341	0.0004911	0.0003803	0.0008492	0.0006486	0.0004954	0.0009094	0.0006851	0.0005162	0.0007927	0.0006139	0.0004754
6.35	0.0004317	0.0003297	0.0002519	0.0004666	0.0003515	0.0002648	0.0003992	0.0003092	0.0002395	0.0005756	0.0004396	0.0003358	0.0006221	0.0004687	0.0003531	0.0005323	0.0004123	0.0003193	0.0007194	0.0005495	0.0004198	0.0007776	0.0005858	0.0004413	0.0006654	0.0005153	0.0003991
6.45	0.0008187	0.0002794	0.0002134	0.0008404	0.0003006	0.0002264	0.0007987	0.0002596	0.000201	0.001092	0.0003725	0.0002845	0.001121	0.0004007	0.0003019	0.001065	0.0003461	0.000268	0.001364	0.0004656	0.0003556	0.001401	0.0005009	0.0003774	0.001331	0.0004326	0.000335
6.55	0.001855	0.0002367	0.0001808	0.001849	0.000257	0.0001936	0.00186	0.0002179	0.0001687	0.002473	0.0003156	0.000241	0.002465	0.0003427	0.0002581	0.00248	0.0002905	0.000225	0.003091	0.0003945	0.0003013	0.003081	0.0004283	0.0003227	0.0031	0.0003632	0.0002812
6.65	0.001855	0.0009266	0.0001532	0.001849	0.0009277	0.0001655	0.00186	0.0009255	0.0001417	0.002473	0.001235	0.0002042	0.002465	0.001237	0.0002207	0.00248	0.001234	0.0001889	0.003091	0.001544	0.0002553	0.003081	0.001546	0.0002759	0.0031	0.001542	0.0002361
6.75	0.001855	0.001105	0.0002905	0.001849	0.001101	0.0002982	0.00186	0.001108	0.0002834	0.002473	0.001473	0.0003873	0.002465	0.001468	0.0003976	0.00248	0.001477	0.0003778	0.003091	0.001841	0.0004841	0.003081	0.001835	0.000497	0.0031	0.001846	0.0004723
6.85	0.001855	0.001105	0.000658	0.001849	0.001101	0.000656	0.00186	0.001108	0.0006599	0.002473	0.001473	0.0008774	0.002465	0.001468	0.0008746	0.00248	0.001477	0.0008799	0.003091	0.001841	0.001097	0.003081	0.001835	0.001093	0.0031	0.001846	0.0011
6.95	0.001298	0.001105	0.000658	0.001294	0.001101	0.000656	0.001302	0.001108	0.0006599	0.001731	0.001473	0.0008774	0.001726	0.001468	0.0008746	0.001736	0.001477	0.0008799	0.002164	0.001841	0.001097	0.002157	0.001835	0.001093	0.00217	0.001846	0.0011
7.05	0	0.001105	0.000658	0	0.001101	0.000656	0	0.001108	0.0006599	0	0.001473	0.0008774	0	0.001468	0.0008746	0	0.001477	0.0008799	0	0.001841	0.001097	0	0.001835	0.001093	0	0.001846	0.0011
7.15	0	0.0002209	0.000658	0	0.0002202	0.000656	0	0.0002216	0.0006599	0	0.0002946	0.0008774	0	0.0002937	0.0008746	0	0.0002954	0.0008799	0	0.0003682	0.001097	0	0.0003671	0.001093	0	0.0003693	0.0011
7.25	0	0	0.0004606	0	0	0.0004592	0	0	0.0004619	0	0	0.0006142	0	0	0.0006122	0	0	0.0006159	0	0	0.0007677	0	0	0.0007653	0	0	0.0007699
Background Source		Weights /Earthquake Rates
Magnitude	0.25	0.5	0.25
4.05	0.4397	0.4379	0.4369
4.15	0.3649	0.3634	0.3626
4.25	0.3028	0.3016	0.3009
4.35	0.2513	0.2503	0.2497
4.45	0.2085	0.2077	0.2072
4.55	0.1731	0.1724	0.172
4.65	0.1436	0.143	0.1427
4.75	0.1192	0.1187	0.1184
4.85	0.0989	0.0985	0.09827
4.95	0.08207	0.08174	0.08155
5.05	0.06811	0.06783	0.06767
5.15	0.05652	0.05629	0.05616
5.25	0.0469	0.04671	0.0466
5.35	0.03892	0.03876	0.03867
5.45	0.0323	0.03217	0.03209
5.55	0.0268	0.02669	0.02663
5.65	0.02224	0.02215	0.0221
5.75	0.01846	0.01838	0.01834
5.85	0.01532	0.01526	0.01522
5.95	0.01271	0.01266	0.01263
6.05	0.01055	0.01051	0.01048
6.15	0.008754	0.008718	0.008698
6.25	0.007264	0.007235	0.007218
6.35	0.006028	0.006004	0.00599
6.45	0.005003	0.004982	0.004971
6.55	0	0.004134	0.004125
6.65	0	0.003431	0.003423
6.75	0	0.002847	0.002841
6.85	0	1.235e-08	0.002357
6.95	0	0	0.001956
7.05	0	0	0.001623
